# Supplementary material for: Relationship between serum uric acid and clustering of cardiovascular disease risk factors and renal disorders among Shanghai population: a multicentre and cross-sectional study
Source: PubMed Central journal article supplement — BMJ Open. 2019 Mar 1;9(3):e025453. doi: 10.1136/bmjopen-2018-025453 (PMC6429858; doi:10.1136/bmjopen-2018-025453), 2019-03-01
Supplement: bmjopen-2018-025453.draft_revisions.pdf [file bmjopen-2018-025453.draft_revisions.pdf]

# BMJ Open

BMJ Open is committed to open peer review. As part of this commitment we make the peer review history of every article we publish publicly available.

When an article is published we post the peer reviewers' comments and the authors' responses online. We also post the versions of the paper that were used during peer review. These are the versions that the peer review comments apply to.

The versions of the paper that follow are the versions that were submitted during the peer review process. They are not the versions of record or the final published versions. They should not be cited or distributed as the published version of this manuscript.

BMJ Open is an open access journal and the full, final, typeset and author-corrected version of record of the manuscript is available on our site with no access controls, subscription charges or pay-per-view fees (<http://bmjopen.bmj.com>).

If you have any questions on BMJ Open's open peer review process please email [editorial.bmjopen@bmj.com](mailto:editorial.bmjopen@bmj.com)

# BMJ Open

## The relationship between serum uric acid and clustering of cardiovascular disease risk factors, renal disorders among Shanghai population

|                               |                                                                                                                                                                                                                                                                                                                                                                                                                                                                                                                                                                                                                                                                                                                                                                                                                                                                                                                                                              |
|-------------------------------|--------------------------------------------------------------------------------------------------------------------------------------------------------------------------------------------------------------------------------------------------------------------------------------------------------------------------------------------------------------------------------------------------------------------------------------------------------------------------------------------------------------------------------------------------------------------------------------------------------------------------------------------------------------------------------------------------------------------------------------------------------------------------------------------------------------------------------------------------------------------------------------------------------------------------------------------------------------|
| Journal:                      | <i>BMJ Open</i>                                                                                                                                                                                                                                                                                                                                                                                                                                                                                                                                                                                                                                                                                                                                                                                                                                                                                                                                              |
| Manuscript ID                 | bmjopen-2018-025453                                                                                                                                                                                                                                                                                                                                                                                                                                                                                                                                                                                                                                                                                                                                                                                                                                                                                                                                          |
| Article Type:                 | Research                                                                                                                                                                                                                                                                                                                                                                                                                                                                                                                                                                                                                                                                                                                                                                                                                                                                                                                                                     |
| Date Submitted by the Author: | 25-Aug-2018                                                                                                                                                                                                                                                                                                                                                                                                                                                                                                                                                                                                                                                                                                                                                                                                                                                                                                                                                  |
| Complete List of Authors:     | <p>Tao, Min<br/>           Pi, Xiaoling; Department of Internal Medicine, Pudong New District Gongli Hospital<br/>           Ma, Xiaoyan; Department of Nephrology, Shanghai East Hospital, Tongji University School of Medicine<br/>           Shi, Yingfeng; Department of Nephrology, Shanghai East Hospital, Tongji University School of Medicine<br/>           Zhuang, Shougang<br/>           Zhang, Yuzhen; Key Laboratory of Arrhythmias of the Ministry of Education of China, Research Center for Translational Medicine, Shanghai East Hospital, Tongji University School of Medicine<br/>           Gu, Hongwei; Department of Nephrology, Shanghai East Hospital, Tongji University School of Medicine<br/>           Chi, Yongbin; Department of Medical Laboratory, Pudong New District Gongli Hospital<br/>           Liu, Na; Department of Nephrology, Shanghai East Hospital, Tongji University School of Medicine, Shanghai, China,</p> |
| Keywords:                     | Serum uric acid, CVD risk factors, renal disorders                                                                                                                                                                                                                                                                                                                                                                                                                                                                                                                                                                                                                                                                                                                                                                                                                                                                                                           |
|                               |                                                                                                                                                                                                                                                                                                                                                                                                                                                                                                                                                                                                                                                                                                                                                                                                                                                                                                                                                              |

SCHOLARONE™  
Manuscripts

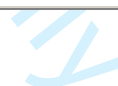

1  
2  
3 **The relationship between serum uric acid and clustering of cardiovascular disease risk factors,**  
4  
5  
6 **renal disorders among Shanghai population**  
7

8 Min Tao<sup>1\*</sup>, Xiaoling Pi<sup>2\*</sup>, Xiaoyan Ma<sup>1\*</sup>, Yingfeng Shi<sup>1</sup>, Shougang Zhuang<sup>1,3</sup>, Yuzhen Zhang<sup>4</sup>, Hongwei  
9  
10 Gu<sup>1</sup>, Yongbin Chi<sup>5</sup>, Na Liu<sup>1</sup>  
11  
12  
13  
14

15  
16 <sup>1</sup>Department of Nephrology, Shanghai East Hospital, Tongji University School of Medicine, Shanghai,  
17  
18 China;  
19

20 <sup>2</sup>Department of Internal Medicine, Pudong New District Gongli Hospital, Shanghai, China;  
21  
22

23 <sup>3</sup>Department of Medicine, Rhode Island Hospital and Brown University School of Medicine, Providence,  
24  
25 RI, USA  
26

27  
28 <sup>4</sup>Key Laboratory of Arrhythmias of the Ministry of Education of China, Research Center for Translational  
29  
30 Medicine, Shanghai East Hospital, Tongji University School of Medicine, Shanghai, 200120, China  
31

32  
33 <sup>5</sup>Department of Medical Laboratory, Pudong New District Gongli Hospital, Shanghai, China  
34  
35  
36  
37  
38  
39

40 \* Min Tao, Xiaoling Pi and Xiaoyan Ma contributed equally to this work.  
41  
42  
43  
44

45 **Corresponding author: Na Liu**, M.D., Ph.D., Department of Nephrology, Shanghai East Hospital,  
46  
47 Tongji University School of Medicine, 150 Jimo road, Pudong new district, Shanghai 200120,  
48  
49 China. **E-mail:** naliubrown@163.com.  
50  
51  
52  
53  
54  
55  
56  
57  
58  
59  
60

## ABSTRACT

**Objectives** To estimate the current prevalence of cardiovascular disease risk factors (CRFs) and renal disorders across serum uric acid (SUA) quartiles, and evaluate the relationships between SUA and CRFs, renal diseases in Shanghai population.

**Study design** Observational, cross-sectional study.

**Setting** Data were obtained from physical checkups of local residents at three hospitals in Shanghai.

**Participants** Residents were invited to take part in physical checkups at three hospitals and provided informed consents. Exclusion criteria were diseases that resemble cancer, hepatic disease and other coexisting illnesses including autoimmune kidney diseases, renal artery stenosis, individuals unable to provide complete information. There are 27176 individuals in our study.

**Primary and secondary outcome measures** Hyperuricemia was defined as serum uric acid  $\geq 7$  mg/dL in males and  $\geq 6$  mg/dL in females. The subjects were divided into gender-specific quartiles. We estimate the current prevalence of cardiovascular disease risk factors (CRFs) and renal disorders across serum uric acid (SUA) quartiles. The relationships between SUA and CRFs, renal disorders at different gender were evaluated with logistic regression analysis.

**Results:** There was a significant increase in the prevalence of major CRFs and renal diseases across SUA quartiles in separate analysis among men and women (all  $P$ -trend $<0.001$ ). After multiple adjustment, hyperuricemia positively connected with overweight/obesity, hypertension, dyslipidemia, renal insufficiency, albuminuria, acid urine, nephrolithiasis, but negatively connected with diabetes mellitus and alkaline urine (all  $P<0.05$ ). Women had a stronger association between hyperuricemia and clustered CVD (cardiovascular disease) risk factors, CKD than men.

1  
2  
3 **Conclusions:** In Shanghai population, concomitant with the elevated level of serum uric acid, the  
4 prevalence rate of CRFs and renal diseases was rising. Hyperuricemia was significantly associated with  
5  
6 CVD risk factors and renal disorders. Therefore, target inhibition of SUA level may have potential to  
7  
8 become an effective therapy in alleviating risks of CVDs and renal disorders, especially in females.  
9  
10  
11

12  
13 **KEY WORDS:** Serum uric acid, CVD risk factors, renal disorders  
14  
15

## 16 17 18 **ARTICLE SUMMARY**

### 19 20 **Article focus**

- 21 ● The current prevalence of cardiovascular disease risk factors (CRFs) and renal diseases across serum  
22 uric acid (SUA) quartiles.
- 23 ● The relationships between SUA and CRFs, renal disorders in Shanghai population.  
24  
25  
26  
27  
28  
29

### 30 31 **Key messages**

- 32 ● In Shanghai population, concomitant with the elevated level of serum uric acid, the prevalence rate of  
33 CRFs and renal diseases was rising.  
34  
35  
36  
37 ● Hyperuricemia was significantly associated with CVD risk factors and renal disorders, especially in  
38 females.  
39  
40  
41  
42

### 43 44 **Strengths and limitations of this study**

- 45 ● We conducted a multi-center study with large sample size which ensured sufficient power in  
46 obtaining the accurate prevalent rate of cardiovascular disease risk factors (CRFs) and renal diseases  
47 and analyzing the relationship between SUA and CRFs, renal disorders across SUA quartiles.  
48  
49  
50  
51 ● The relationship was analyzed in both sexes and we got a solid conclusion about the differences  
52 between men and women.  
53  
54  
55  
56  
57  
58  
59  
60

- It was a cross-section study and the results could not establish causative relationships between hyperuricemia and CRFs clustering and renal diseases. Future follow-up studies are required for more accurate evaluation of these relationships.
- The data were from three medical centers' databases that lacks details in smoking, drinking, lifestyles and thus this might affect the deviations of some clinical outcomes.

## INTRODUCTION

Uric acid (UA) is the final degradation product of purine metabolism in the liver, muscles and intestines<sup>1</sup>. A high level of serum uric acid (SUA) is correlated with multiple disorders such as metabolic syndrome, cardiovascular disease as well as kidney diseases<sup>2-6</sup>. The association between hyperuricemia and CVD risk factors has been widely focused since the last century<sup>7</sup>. There are various risk factors involved in CVDs, including age, sex, obesity, hypertension, diabetes mellitus, dyslipidemia, family history, smoking, depression and so on<sup>8-12</sup>. Numerous indexes of CVDs risk factors were closely associated with increased serum uric acid, such as body mass index (BMI), cholesterol, triglyceride, low-density lipoprotein (LDL), and high-density lipoprotein (HDL), systolic blood pressure (SBP), diastolic blood pressure (DBP), fasting plasma glucose (FPG)<sup>5 13-20</sup>. However, the relationship between hyperuricemia and cardiovascular disease risk factors (CRFs) at different gender of Shanghai population has not been well studied. And the data from multiple clinical centers in China are extremely limited. In this study, we evaluated the prevalence of major CRFs (obesity, hypertension, diabetes mellitus, dyslipidemia) across SUA quartiles and analyzed the association of these factors with SUA level respectively in both men and women.

It has been documented that 70% of the daily UA production is excreted by the kidney<sup>21</sup>. UA tends to crystalize in low urine pH. Hyperuricemia reduces urine pH, and increases the risk of formation of

1  
2  
3 urate stones<sup>22</sup>. Although early clinical studies did not find the association of UA with renal abnormalities  
4  
5  
6<sup>23-27</sup>, recent research indicated that serum uric acid level could predict the development of albuminuria<sup>28</sup>.

7  
8 A prospective study demonstrated that high serum uric acid level is an independent risk factor for  
9  
10 estimated glomerular filtrate rate (eGFR) decline<sup>29</sup>. However, whether UA is a cause or an association to  
11  
12 renal diseases is a question that still waits for further investigations. Thus, we assessed the prevalence of  
13  
14 renal diseases across SUA quartiles, and the relationship between serum uric acid and renal disorders in  
15  
16 Shanghai population.  
17  
18

## 19 20 **METHODS**

### 21 22 **Study population**

23  
24 The permanent residents aged between 16-98 years who participated in the health checkups during the  
25  
26 period from January 2015 and December 2015 of three medical centers Shanghai East Hospital Affiliated  
27  
28 to Tongji University School of Medicine, Pudong New District Gongli Hospital and Baoshan Branch of  
29  
30 Shanghai First People's Hospital were invited in the study. After excluding subjects with incomplete data,  
31  
32 cancer, hepatic disease or other coexisting illnesses including autoimmune kidney diseases, renal artery  
33  
34 stenosis, 27176 participants were enrolled in our study.  
35  
36  
37  
38

### 39 40 **The primary outcomes**

41  
42 Hyperuricemia was defined as serum uric acid  $\geq 7$  mg/dL in males and  $\geq 6$  mg/dL in females or current use  
43  
44 of uric acid (UA)-lowering drugs<sup>30</sup>. SUA was determined using the uricase-peroxidase method.  
45  
46

### 47 48 **Study definitions**

49  
50 Body mass index (BMI) was calculated as weight in kilograms divided by height in squared meters.  
51  
52 According to WHO guidelines for the Asian Pacific population, normal weight was defined as  $18.5 \leq \text{BMI}$   
53  
54  $< 24.0$  kg/m<sup>2</sup>, overweight was defined as  $24.0 \leq \text{BMI} < 28.0$  kg/m<sup>2</sup>, obesity was defined as  $\text{BMI} \geq 28.0$   
55  
56  
57  
58  
59  
60

1  
2  
3 kg/m<sup>2</sup>, underweight was defined as BMI <18.5 kg/m<sup>2</sup> <sup>31</sup>. Blood pressure measurements were taken  
4  
5 according to the Joint National Committee VII criteria (JNC VII)<sup>32</sup>. Normal BP was defined as having  
6  
7 SBP<120 mmHg and DBP<80 mmHg. Pre-hypertension was defined as having SBP of 120–139 mmHg  
8  
9 and/or DBP of 80–89 mmHg. Grade 1 hypertension was defined as having SBP of 140–159 mmHg  
10  
11 and/or DBP of 90–99 mmHg. Grade 2 or grade 3 hypertension was defined as SBP ≥160 mmHg and/or  
12  
13 DBP ≥100 mmHg<sup>32</sup>. According to the Chinese adult dyslipidemia prevention guide (2007 edition),  
14  
15 individuals with a fasting TC ≥6.22 mmol/L, TG ≥2.26 mmol/L, HDL-C<1.04 mmol/L, and/or  
16  
17 LDL-C>4.14 mmol/L, or currently undergoing pharmacologic treatment were defined as the dyslipidemia  
18  
19 <sup>33</sup>. T2D was defined based on World Health Organization (WHO) 1999 diagnostic criteria as fasting plasma  
20  
21 glucose ≥7.0mmol/l or 2-h plasma glucose ≥11.1mmol/l, impaired fasting glucose (IFG) was defined as  
22  
23 6.1 mmol/l ≤ FPG < 7.0 mmol/l, and normal condition was defined as FPG <6.1 mmol/l<sup>34</sup>. The eGFR was  
24  
25 calculated using Modification of Diet in Renal Disease (MDRD) formula <sup>35</sup>: 186×[serum creatinine (mg/  
26  
27 dl)]-1.154×(age)-0.203×[0.742 (if female)]. According to the Kidney Disease Outcomes Quality Initiative  
28  
29 (KDOQI) clinical practice guideline, estimated glomerular filtration rate (eGFR) <60 mL/min/1.73 m<sup>2</sup>,  
30  
31 proteinuria and hematuria were defined as markers of CKD<sup>36</sup>. Urine proteinuria were recorded as negative  
32  
33 (-), trace, 1+, 2+ and 3+. Albuminuria was defined as ≥1+.

### 44 45 **Data collection**

46  
47 The subjects participating in the study attended to the medical center in the morning after overnight  
48  
49 fasting for at least 12 hours. After 5 minutes resting, sitting blood pressure was measured in right arm by  
50  
51 a trained medical staff using an electronic blood pressure monitor. The resting BP was measured three  
52  
53 times with five minutes intervals between them, and then the averages were calculated, which were used  
54  
55  
56  
57  
58  
59  
60



1  
2  
3 for further analysis. Blood samples were obtained on their arrival at the medical center and fasting  
4  
5 glucose (FPG) were measured by the hexokinase method, total cholesterol, low-density  
6  
7 lipoprotein-cholesterol (LDL-C), high-density lipoprotein-cholesterol (HDL-C), triglyceride, blood urea  
8  
9 nitrogen (BUN), creatinine, serum uric acid were measured in an automated bio-analyzer (Hitachi, Tokyo,  
10  
11 Japan). Midstream urine specimen was collected for urinary analysis by the dipstick method. Urine pH  
12  
13 and proteinuria were recorded as categorical data.  
14  
15  
16

17  
18 After blood and urine sampling, basic characteristics and medical history were collected by medical  
19  
20 staff. Anthropometric measurements including height and body weight were obtained according to a  
21  
22 standardized protocol. Renal ultrasonography scanning was performed and measured by an experienced  
23  
24 radiologist using GE LOGIQ P5 scanner (GE Healthcare, Milwaukee, SUA) who was blinded to the  
25  
26 subjects' medical information.  
27  
28  
29  
30  
31

### 32 **Patient and public involvement**

33  
34 No patient was involved in the design or conduct of the study, but the results of the study will be shared  
35  
36 to patients coming for follow-up.  
37  
38  
39

### 40 **Statistical analysis**

41  
42 We divided the subjects into gender-specific quartiles [males (M): Q1 ≤ 4.9, Q2: 5.0-5.9, Q3: 6.0-6.9, Q4  
43  
44 ≥ 7.0 mg/dL; females (F): Q1 ≤ 3.9, Q2: 4.0-4.9, Q3: 5.0-5.9, Q4 ≥ 6.0mg/dL] according to serum uric  
45  
46 acid level. Continuous variables with a normal distribution were presented as the mean ± standard  
47  
48 deviation. Categorical variables were described by frequency and percentage. Analysis of variance  
49  
50 (ANOVA) was used to calculate the differences between continuous variables. Chi-square test was used  
51  
52 for comparisons of categorical variables among groups. Pearson's correlation test was used to assess the  
53  
54  
55  
56  
57  
58  
59

1  
2  
3 association between serum UA level and various clinical parameters. Multivariable logistic regression  
4 analysis (unadjusted and full-adjusted) was used to calculate the odds ratio for hyperuricemia according  
5 to different status of clinical parameters. Furthermore, multivariable logistic regression analysis (multiple  
6 adjusted models) was used to examine the association between related diseases and the SUA categories of  
7 Q2 or greater compared to the lowest SUA category. The association between hyperuricemia and  
8 clustered CVD risk factors had been calculated. Statistical analyses were performed by IBM SPSS  
9 statistics version 20.0 (SPSS, Chicago, IL, USA). Statistical significance was set at *P*-values of <0.05.

## 20 RESULTS

### 23 Clinical characteristics of participants in quartiles of serum uric acid level.

24  
25 A total of 27,176 participants with mean age  $48.88 \pm 15.48$  years, and 15300 (56.3%) men and 11876  
26 (43.7%) women completed in the study. The prevalence rates of hyperuricemia of men and women were  
27 22.3 % (95% confidence intervals 20.9–23.7%) and 11.1% (9.4–12.8%), respectively. Female individuals  
28 with higher level of SUA were older than the age of males. With increasing quartiles of SUA, participants  
29 had more CVDs risk factors (obesity, hypertension, dyslipidemia) and renal diseases (chronic kidney  
30 disease, nephrolithiasis), as well as elevated levels of body mass index, systolic blood pressure, diastolic  
31 blood pressure, total cholesterol, triglyceride, low density lipoprotein cholesterol, creatinine, blood urea  
32 nitrogen (BUN), and decreased levels of high density lipoprotein cholesterol, estimated glomerular  
33 filtration rate in both men and women (Table 1, all *P* values for trend <0.001).

### 50 The prevalence of CVD risk factors, renal diseases in quartiles of serum uric acid level

51  
52 As demonstrated in Figure 1, there was a significant increase in the prevalence of cardiovascular disease  
53 risk factors and renal disorders across SUA quartiles in men and women (all *P* value for trend <0.001). In  
54  
55  
56  
57  
58  
59

1  
2  
3 the male hyperuricemia individuals, the prevalence rates of obesity, hypertension, diabetes mellitus,  
4  
5  
6 dyslipidemia, chronic kidney disease and nephrolithiasis were 23.8% (95% CI, 20.9-26.7%), 35.7%  
7  
8 (33.0-38.4%), 4.9% (1.6-8.2%), 54.3% (52.0-56.6%), 7.0% (3.8-10.2%) and 18.6% (15.6-21.6%)  
9  
10 respectively. In the female hyperuricemia individuals, the prevalence rates of obesity, hypertension,  
11  
12  
13 diabetes mellitus, dyslipidemia, chronic kidney disease and nephrolithiasis were 23.8% (19.1-28.5%),  
14  
15 43.2% (39.1-47.3%), 10.0% (4.9-15.1%), 45.8% (41.8-49.8%), 12.9% (7.9-17.9%) and 16.9%  
16  
17 (12.0-21.8%) respectively.  
18  
19  
20  
21  
22

### 23 **The correlation between serum uric acid and various clinical parameters**

24  
25 We used Pearson's correlation analysis to investigate the relationships and the results were shown in  
26  
27 Table 2. In men, the level of serum uric acid was positively correlated with BMI, SBP, DBP, TC, TG,  
28  
29 LDL-C, and negatively correlated with age, FPG, HDL-C and eGFR (all  $P$  values<0.001). In women, the  
30  
31 level of serum uric acid was positively correlated with age, BMI, SBP, DBP, FPG, TC, TG, LDL-C, and  
32  
33 negatively correlated with HDL-C and eGFR (all  $P$  values<0.001).  
34  
35  
36  
37  
38  
39

### 40 **The association between hyperuricemia and the clinical outcome**

41  
42 Multivariable logistic regression models (unadjusted and full-adjusted) were analyzed and the results  
43  
44 were shown in Table 3 with the odds ratio for hyperuricemia according to different clinical outcome. We  
45  
46 found that after adjustment for confounders, increased levels of BMI, BP, triglyceride, LDL-C,  
47  
48 albuminuria all are positively related to increased odds ratio of hyperuricemia. Renal insufficiency, acid  
49  
50 urine, nephrolithiasis also positively correlated with hyperuricemia, however, FPG and alkaline urine  
51  
52 negatively correlated with hyperuricemia in both gender (all  $P$  values<0.05). These results suggested that  
53  
54  
55  
56  
57  
58  
59  
60

1  
2  
3 the individuals with overweight/obesity, hypertension, dyslipidemia, renal insufficiency, massive  
4 albuminuria, acid urine, nephrolithiasis were more susceptible to hyperuricemia in both men and women.  
5  
6  
7  
8  
9

### 10 **The relationship between different levels of serum uric acid and CVDs risk factors, renal disorders**

11  
12 Multivariable logistic regression analysis (multiple adjusted models) was studied and the results were  
13 shown in Table 4. The odd ratio for obesity, hypertension, diabetes mellitus, dyslipidemia, chronic kidney  
14 disease, nephrolithiasis in the highest SUA quartile was 3.115 (95% CI 2.604–3.727,  $P < 0.001$ , model 3),  
15 1.290 (95% CI 1.136–1.465,  $P < 0.001$ , model 3), 0.205 (95% CI 0.165–0.255,  $P < 0.001$ , model 3), 2.503  
16 (95% CI 2.226–2.815,  $P < 0.001$ , model 3), 6.962 (95% CI 4.921–9.851,  $P < 0.001$ , model 3), 1.480 (95%  
17 CI 1.272–1.722,  $P < 0.001$ , model 3) compared with that in the lowest SUA quartile, respectively, in men.  
18  
19  
20  
21  
22  
23  
24  
25  
26  
27

28 The data in table 5 were multivariable logistic regression analysis in women and the odd ratio for  
29 obesity, hypertension, diabetes mellitus, dyslipidemia, chronic kidney disease, nephrolithiasis in the  
30 highest SUA quartile was 3.755 (95% CI 2.956–4.769,  $P < 0.001$ , model 3), 1.287 (95% CI 1.075–1.539,  
31  $P = 0.006$ , model 3), 0.514 (95% CI 0.377–0.701,  $P < 0.001$ , model 3), 3.675 (95% CI 3.114–4.336,  $P$   
32  $< 0.001$ , model 3), 11.508 (95% CI 7.242–18.288,  $P < 0.001$ , model 3), 1.239 (95% CI 1.008–1.522,  $P$   
33  $= 0.042$ , model 3) compared with that in the lowest SUA quartile, respectively.  
34  
35  
36  
37  
38  
39  
40  
41  
42

43 From multivariable logistic regression analysis in men and women we concluded that hyperuricemia  
44 positively correlated with obesity, hypertension, dyslipidemia, chronic kidney disease, nephrolithiasis, but  
45 negatively correlated with diabetes mellitus (all  $P < 0.05$ ) in both gender. Furthermore, females had  
46 stronger association between hyperuricemia and chronic kidney disease than males.  
47  
48  
49  
50  
51  
52  
53  
54

### 55 **The association between hyperuricemia and clustered CVD risk factors.**

1  
2  
3  
4  
5  
6  
7  
8  
9  
10  
11  
12  
13  
14  
15  
16  
17  
18  
19  
20  
21  
22  
23  
24  
25  
26  
27  
28  
29  
30  
31  
32  
33  
34  
35  
36  
37  
38  
39  
40  
41  
42  
43  
44  
45  
46  
47  
48  
49  
50  
51  
52  
53  
54  
55  
56  
57  
58  
59  
60

Multivariable logistic regression was analyzed for hyperuricemia and clustered CVD risk factors, the results were shown in Table 6. After adjustment for age, compared with the group of zero CVD risk factor reference group, the odd ratio for group of  $\geq 3$  CVD risk factors was 3.804 (95% CI 3.252–4.450,  $P < 0.001$ ), 6.265 (95% CI 4.945–7.938,  $P < 0.001$ ) in men and women, respectively. The individuals with more CVD risk factors were associated with the higher ORs of hyperuricemia both in men and women ( $P$  for trend  $< 0.001$ ). Furthermore, females had a stronger association of hyperuricemia with clustered CVD risk factors than males.

## DISCUSSION

In present study, we found that increasing prevalence of CVD risk factors and renal disorders was predominantly associated with increased SUA level in Shanghai population. Moreover, our results demonstrated that the level of uric acid correlated negatively with age in men, but positively with the age in women. The gender-related differences between serum uric acid level and age could be resulted from sex hormones<sup>37</sup>. One of the interesting findings in our investigation was that the higher level of SUA was positively correlated with the higher prevalence rates of diabetes mellitus in women, but inversely correlated with that in men. Further, the Pearson's correlation analysis demonstrated that the level of SUA positively correlated with fasting plasma glucose in women, but negatively in men, which may be due to the differences in lifestyles, occupations and sex hormones between men and women. However, multivariable logistic regression analysis after adjustment of confounding factors showed inverse association of serum uric acid with diabetes mellitus in both men and women, and this is probably due to the presence of high level of blood glucose which promotes renal excretion of serum uric acid. It has been indicated that hyperglycaemia worsens the function of beta cells and deteriorates glycemic control, which

1  
2  
3 gradually elevates the rate of renal glomerular filtration.<sup>38</sup>The hyperfiltration due to multiple kidney  
4 disorders will lead to increase of the excretion of uric acid, and it will be more susceptible to diabetic  
5 nephropathy with decreasing eGFR<sup>39</sup>.  
6  
7  
8  
9

10 Based on our data, hyperuricemia had a remarkable association with cardiovascular disease risk  
11 factors and renal disorders. The more CVD risk factors individuals had, the higher ORs of hyperuricemia  
12 were observed in both genders. There were numerous mechanisms involved in the close association  
13 between serum uric acid and CVDs<sup>20 40-42</sup> Uric acid stimulates platelet-derived growth factor receptor $\beta$   
14 (PDGFR $\beta$ ) phosphorylation, leading to vascular smooth muscle cell (VSMC) proliferation<sup>40</sup>. Uric acid  
15 increases oxidative stress and stimulates the activation of renin-angiotensin system, resulting in the  
16 senescence and apoptosis of human umbilical vein endothelial cells (HUVECs)<sup>41</sup>. Uric acid also can  
17 cause mitochondrial alterations and decreased intracellular ATP production and subsequently result in  
18 endothelial dysfunction in human aortic endothelial cells (HAECs)<sup>42</sup>. A large quantity of animal  
19 experiments and human epidemiological documents indicated that SUA-lowering treatment was beneficial  
20 for cardiovascular diseases<sup>20 43-45</sup>.  
21  
22  
23  
24  
25  
26  
27  
28  
29  
30  
31  
32  
33  
34  
35  
36

37 On the other hand, the related mechanisms in the link between hyperuricemia and chronic kidney  
38 disease (CKD) were not well investigated. It was demonstrated that 70% of urate eliminated occurs in the  
39 kidneys, and decreased eGFR would result in elevated levels of SUA<sup>46</sup>. However, uric acid could induce  
40 oxidative stress, trigger activation of RAAS and inflammation, cause endothelial dysfunction, and thus  
41 subsequently lead to decline of eGFR<sup>42 47 48</sup>. The persistent high level of SUA predicts the high risk of  
42 developing CKD<sup>49</sup>. There was a marked association of SUA with albuminuria in patients with renal  
43 insufficiency<sup>50</sup>. Our study were in consistent with many prospective studies<sup>29 51 52</sup>, showing that SUA is  
44 a significant risk factor for CKD and proteinuria, which is independent of confounders of CRFs. We  
45  
46  
47  
48  
49  
50  
51  
52  
53  
54  
55  
56  
57  
58  
59  
60

1  
2  
3 further demonstrated that hyperuricemia significantly correlated with acid urine and nephrolithiasis,  
4  
5  
6 which was confirmed by the prevalence rates of chronic kidney disease and nephrolithiasis across the  
7  
8 SUA levels.  
9

## 10 **CONCLUSION**

11  
12  
13 In summary, our data demonstrated that the increasing prevalent rate of CRFs and renal disorders were  
14  
15 significantly correlated with the elevated level of serum uric acid. Hyperuricemia was remarkably linked  
16  
17 with CVD-related risk factors and kidney diseases. Furthermore, a close correlation between  
18  
19 hyperuricemia and clustered CVD risk factors, CKD was observed in females than in males. Thus,  
20  
21 decreasing SUA level may become a potential therapeutic treatment in preventing or delaying the  
22  
23 multiple risks of CVDs and renal diseases, especially in women.  
24  
25  
26  
27  
28  
29

30 **Acknowledgements** The authors appreciate all the participants and their families. They also thank the  
31  
32 members of the study team from Shanghai East Hospital Affiliated to Tongji University School of  
33  
34 Medicine, Pudong New District Gongli Hospital and Baoshan Branch of Shanghai First People's Hospital  
35  
36 for their assistance in completing this project.  
37  
38  
39

40 **Author Contributions** M.T., N.L., S.Z., Y.S. and Y.Z. performed the statistical analysis and wrote the  
41  
42 manuscript; M.T., X.M., X.P., Y.C., H.G. and Y.S. participated in the data collection; M.T., N.L., S.Z.  
43  
44 and Y.Z. contributed to discussion; M.T., and N.L. participated in the design of the study and edited the  
45  
46 manuscript. All authors have read and approved the final manuscript. The corresponding author had full  
47  
48 access to all the data in the study and had final responsibility for the decision to submit for publication.  
49  
50  
51

## 52 **Funding**

53  
54  
55 This study was also supported by the National Nature Science Foundation of China grants (81670690,  
56  
57  
58  
59  
60

1  
2  
3 81470991 and 81200492 to N.L., 81670623, 81470920 and 81270778 to S.Z.), US National Institutes of  
4  
5 Health (2R01DK08506505A1 to S.Z.), Shanghai Health Bureau grant (20134464 to X.P.) and the Key  
6  
7 Discipline Construction Project of Pudong Health Bureau of Shanghai (PWZxk2017-05 to N.L.).  
8  
9

10 **Competing interests** None declared.

11  
12  
13 **Patient consent** Obtained.

14  
15  
16 **Ethics approval and consent to participate**

17  
18 This study was approved by the Human Research Ethics Committee of Shanghai East Hospital Affiliated to  
19  
20 Tongji University School of Medicine, the Human Research Ethics Committee of Pudong New District  
21  
22 Gongli Hospital and the Human Research Ethics Committee of Baoshan Branch of Shanghai First People's  
23  
24 Hospital. All methods were performed in compliance with Good Clinical Practice (GCP) guidelines and the  
25  
26 Declaration of Helsinki. Written informed consent was obtained from each participant before data  
27  
28 collection.  
29  
30  
31

32  
33 **Provenance and peer review** Not commissioned; externally peer reviewed.

34  
35 **Data sharing statement** The data sets generated and analysed during the current study are available from  
36  
37 the corresponding author upon reasonable request.  
38  
39

40 **Open Access** This is an Open Access article distributed in accordance with the Creative Commons  
41  
42 Attribution Non Commercial (CC BY-NC 4.0) license, which permits others to distribute, remix, adapt,  
43  
44 build upon this work non-commercially, and license their derivative works on different terms, provided the  
45  
46 original work is properly cited and the use is non-commercial.  
47  
48

49  
50 See: <http://creativecommons.org/licenses/by-nc/4.0/>

51  
52 © Article author(s) (or their employer(s) unless otherwise stated in the text of the article) 2018. All rights  
53  
54 reserved. No commercial use is permitted unless otherwise expressly granted.  
55  
56  
57  
58  
59  
60



**REFERENCES**

1. Hediger MA, Johnson RJ, Miyazaki H, et al. Molecular physiology of urate transport. *Physiology (Bethesda, Md)* 2005;20:125-33. doi: 10.1152/physiol.00039.2004 [published Online First: 2005/03/18]
2. Johnson RJ, Kang DH, Feig D, et al. Is there a pathogenetic role for uric acid in hypertension and cardiovascular and renal disease? *Hypertension (Dallas, Tex : 1979)* 2003;41(6):1183-90. doi: 10.1161/01.hyp.0000069700.62727.c5 [published Online First: 2003/04/23]
3. Dehghan A, van Hoek M, Sijbrands EJ, et al. High serum uric acid as a novel risk factor for type 2 diabetes. *Diabetes care* 2008;31(2):361-2. doi: 10.2337/dc07-1276 [published Online First: 2007/11/06]
4. Holme I, Aastveit AH, Hammar N, et al. Uric acid and risk of myocardial infarction, stroke and congestive heart failure in 417,734 men and women in the Apolipoprotein MOrtality RISk study (AMORIS). *Journal of internal medicine* 2009;266(6):558-70. doi: 10.1111/j.1365-2796.2009.02133.x [published Online First: 2009/07/01]
5. Verdecchia P, Schillaci G, Reboldi G, et al. Relation between serum uric acid and risk of cardiovascular disease in essential hypertension. The PIUMA study. *Hypertension (Dallas, Tex : 1979)* 2000;36(6):1072-8. [published Online First: 2000/01/11]
6. Bergamini C, Cicoira M, Rossi A, et al. Oxidative stress and hyperuricaemia: pathophysiology, clinical relevance, and therapeutic implications in chronic heart failure. *European journal of heart failure* 2009;11(5):444-52. doi: 10.1093/eurjhf/hfp042 [published Online First: 2009/04/07]

- 1  
2  
3  
4 7. Gertler MM, Garn SM, Levine SA. Serum uric acid in relation to age and physique in health and in  
5  
6 coronary heart disease. *Annals of internal medicine* 1951;34(6):1421-31. [published Online First:  
7  
8 1951/06/01]  
9
- 10  
11 8. Banerjee A. A review of family history of cardiovascular disease: risk factor and research tool.  
12  
13 *International journal of clinical practice* 2012;66(6):536-43. doi:  
14  
15 10.1111/j.1742-1241.2012.02908.x [published Online First: 2012/05/23]  
16  
17
- 18 9. Gomez-Puerta JA, Feldman CH, Alarcon GS, et al. Racial and Ethnic Differences in Mortality and  
19  
20 Cardiovascular Events Among Patients With End-Stage Renal Disease Due to Lupus Nephritis.  
21  
22 *Arthritis care & research* 2015;67(10):1453-62. doi: 10.1002/acr.22562 [published Online First:  
23  
24 2015/01/28]  
25  
26
- 27  
28 10. Quarells RC, Liu J, Davis SK. Social determinants of cardiovascular disease risk factor presence  
29  
30 among rural and urban Black and White men. *Journal of men's health* 2012;9(2):120-26. doi:  
31  
32 10.1016/j.jomh.2012.03.004 [published Online First: 2012/08/21]  
33  
34
- 35 11. Song YK, Lee KK, Kim HR, et al. Job demand and cardiovascular disease risk factor in white-collar  
36  
37 workers. *Industrial health* 2010;48(1):12-7. [published Online First: 2010/02/18]  
38  
39
- 40 12. Suls J, Bunde J. Anger, anxiety, and depression as risk factors for cardiovascular disease: the  
41  
42 problems and implications of overlapping affective dispositions. *Psychological bulletin*  
43  
44 2005;131(2):260-300. doi: 10.1037/0033-2909.131.2.260 [published Online First: 2005/03/03]  
45  
46
- 47 13. Kim SY, Guevara JP, Kim KM, et al. Hyperuricemia and coronary heart disease: a systematic review  
48  
49 and meta-analysis. *Arthritis care & research* 2010;62(2):170-80. doi: 10.1002/acr.20065  
50  
51 [published Online First: 2010/03/02]  
52  
53  
54  
55  
56  
57  
58  
59  
60

- 1  
2  
3  
4 14. Agamah ES, Srinivasan SR, Webber LS, et al. Serum uric acid and its relation to cardiovascular  
5  
6 disease risk factors in children and young adults from a biracial community: the Bogalusa Heart  
7  
8 Study. *The Journal of laboratory and clinical medicine* 1991;118(3):241-9. [published Online  
9  
10 First: 1991/09/01]  
11  
12
- 13 15. Lee J, Sparrow D, Vokonas PS, et al. Uric acid and coronary heart disease risk: evidence for a role of  
14  
15 uric acid in the obesity-insulin resistance syndrome. The Normative Aging Study. *American*  
16  
17 *journal of epidemiology* 1995;142(3):288-94. [published Online First: 1995/08/01]  
18  
19  
20
- 21 16. Bonora E, Targher G, Zenere MB, et al. Relationship of uric acid concentration to cardiovascular risk  
22  
23 factors in young men. Role of obesity and central fat distribution. The Verona Young Men  
24  
25 Atherosclerosis Risk Factors Study. *International journal of obesity and related metabolic*  
26  
27 *disorders : journal of the International Association for the Study of Obesity* 1996;20(11):975-80.  
28  
29 [published Online First: 1996/11/01]  
30  
31  
32
- 33 17. Wannamethee SG, Shaper AG, Whincup PH. Serum urate and the risk of major coronary heart  
34  
35 disease events. *Heart (British Cardiac Society)* 1997;78(2):147-53. [published Online First:  
36  
37 1997/08/01]  
38  
39
- 40 18. Culleton BF, Larson MG, Kannel WB, et al. Serum uric acid and risk for cardiovascular disease and  
41  
42 death: the Framingham Heart Study. *Annals of internal medicine* 1999;131(1):7-13. [published  
43  
44 Online First: 1999/07/03]  
45  
46
- 47 19. Feig DI, Mazzali M, Kang DH, et al. Serum uric acid: a risk factor and a target for treatment? *Journal*  
48  
49 *of the American Society of Nephrology : JASN* 2006;17(4 Suppl 2):S69-73. doi:  
50  
51 10.1681/asn.2005121331 [published Online First: 2006/03/28]  
52  
53  
54  
55  
56  
57  
58  
59  
60

- 1  
2  
3  
4 20. Strazzullo P, Puig JG. Uric acid and oxidative stress: relative impact on cardiovascular risk? *Nutrition,*  
5  
6 *metabolism, and cardiovascular diseases : NMCD* 2007;17(6):409-14. doi:  
7  
8 10.1016/j.numecd.2007.02.011 [published Online First: 2007/07/24]  
9  
10  
11 21. Maesaka JK, Fishbane S. Regulation of renal urate excretion: a critical review. *American journal of*  
12  
13 *kidney diseases : the official journal of the National Kidney Foundation* 1998;32(6):917-33.  
14  
15 [published Online First: 1998/12/18]  
16  
17  
18 22. DiBianco JM, Jarrett TW, Mufarrrij P. Metabolic Syndrome and Nephrolithiasis Risk: Should the  
19  
20 Medical Management of Nephrolithiasis Include the Treatment of Metabolic Syndrome? *Reviews*  
21  
22 *in urology* 2015;17(3):117-28. [published Online First: 2015/11/07]  
23  
24  
25 23. Champion EW, Glynn RJ, DeLabry LO. Asymptomatic hyperuricemia. Risks and consequences in the  
26  
27 Normative Aging Study. *The American journal of medicine* 1987;82(3):421-6. [published Online  
28  
29 First: 1987/03/01]  
30  
31  
32  
33 24. Langford HG, Blafox MD, Borhani NO, et al. Is thiazide-produced uric acid elevation harmful?  
34  
35 Analysis of data from the Hypertension Detection and Follow-up Program. *Archives of internal*  
36  
37 *medicine* 1987;147(4):645-9. [published Online First: 1987/04/01]  
38  
39  
40 25. Hall AP, Barry PE, Dawber TR, et al. Epidemiology of gout and hyperuricemia. A long-term  
41  
42 population study. *The American journal of medicine* 1967;42(1):27-37. [published Online First:  
43  
44 1967/01/01]  
45  
46  
47 26. Fessel WJ. Renal outcomes of gout and hyperuricemia. *The American journal of medicine*  
48  
49 1979;67(1):74-82. [published Online First: 1979/07/01]  
50  
51  
52 27. Liang MH, Fries JF. Asymptomatic hyperuricemia: the case for conservative management. *Annals of*  
53  
54 *internal medicine* 1978;88(5):666-70. [published Online First: 1978/05/01]  
55  
56  
57  
58  
59  
60

- 1  
2  
3  
4 28. Jalal DI, Rivard CJ, Johnson RJ, et al. Serum uric acid levels predict the development of albuminuria  
5  
6 over 6 years in patients with type 1 diabetes: findings from the Coronary Artery Calcification in  
7  
8 Type 1 Diabetes study. *Nephrology, dialysis, transplantation : official publication of the*  
9  
10 *European Dialysis and Transplant Association - European Renal Association* 2010;25(6):1865-9.  
11  
12 doi: 10.1093/ndt/gfp740 [published Online First: 2010/01/13]  
13  
14  
15  
16 29. Bellomo G, Venanzi S, Verdura C, et al. Association of uric acid with change in kidney function in  
17  
18 healthy normotensive individuals. *American journal of kidney diseases : the official journal of the*  
19  
20 *National Kidney Foundation* 2010;56(2):264-72. doi: 10.1053/j.ajkd.2010.01.019 [published  
21  
22 Online First: 2010/04/14]  
23  
24  
25  
26 30. Becker MA, Schumacher HR, Jr., Wortmann RL, et al. Febuxostat compared with allopurinol in  
27  
28 patients with hyperuricemia and gout. *The New England journal of medicine*  
29  
30 2005;353(23):2450-61. doi: 10.1056/NEJMoa050373 [published Online First: 2005/12/13]  
31  
32  
33 31. Appropriate body-mass index for Asian populations and its implications for policy and intervention  
34  
35 strategies. *Lancet (London, England)* 2004;363(9403):157-63. doi:  
36  
37 10.1016/s0140-6736(03)15268-3 [published Online First: 2004/01/17]  
38  
39  
40 32. National High Blood Pressure Education P. The Seventh Report of the Joint National Committee on  
41  
42 Prevention, Detection, Evaluation, and Treatment of High Blood Pressure. Bethesda (MD):  
43  
44 National Heart, Lung, and Blood Institute (US) 2004.  
45  
46  
47 33. [Chinese guidelines on prevention and treatment of dyslipidemia in adults]. *Zhonghua xin xue guan*  
48  
49 *bing za zhi* 2007;35(5):390-419. [published Online First: 2007/08/23]  
50  
51  
52 34. Alberti KG, Zimmet PZ. Definition, diagnosis and classification of diabetes mellitus and its  
53  
54 complications. Part 1: diagnosis and classification of diabetes mellitus provisional report of a  
55  
56  
57  
58  
59  
60

- 1  
2  
3 WHO consultation. *Diabetic medicine : a journal of the British Diabetic Association*  
4  
5 1998;15(7):539-53. doi: 10.1002/(sici)1096-9136(199807)15:7<539::aid-dia668>3.0.co;2-s  
6  
7 [published Online First: 1998/08/01]  
8  
9
- 10 35. Levey AS, Bosch JP, Lewis JB, et al. A more accurate method to estimate glomerular filtration rate  
11  
12 from serum creatinine: a new prediction equation. Modification of Diet in Renal Disease Study  
13  
14 Group. *Annals of internal medicine* 1999;130(6):461-70. [published Online First: 1999/03/13]  
15  
16
- 17 36. K/DOQI clinical practice guidelines for chronic kidney disease: evaluation, classification, and  
18  
19 stratification. *American journal of kidney diseases : the official journal of the National Kidney*  
20  
21 *Foundation* 2002;39(2 Suppl 1):S1-266. [published Online First: 2002/03/21]  
22  
23
- 24 37. Sekine T, Miyazaki H, Endou H. Molecular physiology of renal organic anion transporters. *American*  
25  
26 *journal of physiology Renal physiology* 2006;290(2):F251-61. doi: 10.1152/ajprenal.00439.2004  
27  
28 [published Online First: 2006/01/13]  
29  
30
- 31 38. Li Q, Yang Z, Lu B, et al. Serum uric acid level and its association with metabolic syndrome and  
32  
33 carotid atherosclerosis in patients with type 2 diabetes. *Cardiovascular diabetology* 2011;10:72.  
34  
35 doi: 10.1186/1475-2840-10-72 [published Online First: 2011/08/06]  
36  
37
- 38 39. Lytvyn Y, Skrtic M, Yang GK, et al. Glycosuria-mediated urinary uric acid excretion in patients with  
39  
40 uncomplicated type 1 diabetes mellitus. *American journal of physiology Renal physiology*  
41  
42 2015;308(2):F77-83. doi: 10.1152/ajprenal.00555.2014 [published Online First: 2014/11/08]  
43  
44
- 45 40. Kirca M, Oguz N, Cetin A, et al. Uric acid stimulates proliferative pathways in vascular smooth  
46  
47 muscle cells through the activation of p38 MAPK, p44/42 MAPK and PDGFRbeta. *Journal of*  
48  
49 *receptor and signal transduction research* 2017;37(2):167-73. doi:  
50  
51 10.1080/10799893.2016.1203941 [published Online First: 2016/07/13]  
52  
53  
54  
55  
56  
57  
58  
59  
60

- 1  
2  
3  
4 41. Yu MA, Sanchez-Lozada LG, Johnson RJ, et al. Oxidative stress with an activation of the  
5  
6 renin-angiotensin system in human vascular endothelial cells as a novel mechanism of uric  
7  
8 acid-induced endothelial dysfunction. *Journal of hypertension* 2010;28(6):1234-42. [published  
9  
10 Online First: 2010/05/21]  
11  
12
- 13 42. Sanchez-Lozada LG, Lanasma MA, Cristobal-Garcia M, et al. Uric acid-induced endothelial  
14  
15 dysfunction is associated with mitochondrial alterations and decreased intracellular ATP  
16  
17 concentrations. *Nephron Experimental nephrology* 2012;121(3-4):e71-8. doi: 10.1159/000345509  
18  
19 [published Online First: 2012/12/14]  
20  
21  
22
- 23 43. Baker JF, Krishnan E, Chen L, et al. Serum uric acid and cardiovascular disease: recent developments,  
24  
25 and where do they leave us? *The American journal of medicine* 2005;118(8):816-26. doi:  
26  
27 10.1016/j.amjmed.2005.03.043 [published Online First: 2005/08/09]  
28  
29
- 30 44. Hoiegggen A, Alderman MH, Kjeldsen SE, et al. The impact of serum uric acid on cardiovascular  
31  
32 outcomes in the LIFE study. *Kidney international* 2004;65(3):1041-9. doi:  
33  
34 10.1111/j.1523-1755.2004.00484.x [published Online First: 2004/02/12]  
35  
36  
37
- 38 45. Smit FE, Dohmen PM. Cardiovascular tissue engineering: where we come from and where are we  
39  
40 now? *Medical science monitor basic research* 2015;21:1-3. doi: 10.12659/msmbr.893546  
41  
42 [published Online First: 2015/01/28]  
43  
44
- 45 46. Marangella M. Uric acid elimination in the urine. Pathophysiological implications. *Contributions to*  
46  
47 *nephrology* 2005;147:132-48. doi: 10.1159/000082551 [published Online First: 2004/12/18]  
48  
49
- 50 47. Zhou Y, Fang L, Jiang L, et al. Uric acid induces renal inflammation via activating tubular  
51  
52 NF-kappaB signaling pathway. *PloS one* 2012;7(6):e39738. doi: 10.1371/journal.pone.0039738  
53  
54 [published Online First: 2012/07/05]  
55  
56  
57  
58  
59  
60

- 1  
2  
3  
4 48. Corry DB, Eslami P, Yamamoto K, et al. Uric acid stimulates vascular smooth muscle cell  
5  
6 proliferation and oxidative stress via the vascular renin-angiotensin system. *Journal of*  
7  
8 *hypertension* 2008;26(2):269-75. doi: 10.1097/HJH.0b013e3282f240bf [published Online First:  
9  
10 2008/01/15]  
11  
12
- 13 49. Chou YC, Kuan JC, Yang T, et al. Elevated uric acid level as a significant predictor of chronic kidney  
14  
15 disease: a cohort study with repeated measurements. *Journal of nephrology* 2015;28(4):457-62.  
16  
17 doi: 10.1007/s40620-014-0158-9 [published Online First: 2014/11/21]  
18  
19
- 20 50. De Cosmo S, Viazzi F, Pacilli A, et al. Serum Uric Acid and Risk of CKD in Type 2 Diabetes.  
21  
22 *Clinical journal of the American Society of Nephrology : CJASN* 2015;10(11):1921-9. doi:  
23  
24 10.2215/cjn.03140315 [published Online First: 2015/09/06]  
25  
26  
27
- 28 51. Takae K, Nagata M, Hata J, et al. Serum Uric Acid as a Risk Factor for Chronic Kidney Disease in a  
29  
30 Japanese Community- The Hisayama Study. *Circulation journal : official journal of the Japanese*  
31  
32 *Circulation Society* 2016;80(8):1857-62. doi: 10.1253/circj.CJ-16-0030 [published Online First:  
33  
34 2016/06/21]  
35  
36  
37
- 38 52. Li L, Yang C, Zhao Y, et al. Is hyperuricemia an independent risk factor for new-onset chronic kidney  
39  
40 disease?: A systematic review and meta-analysis based on observational cohort studies. *BMC*  
41  
42 *nephrology* 2014;15:122. doi: 10.1186/1471-2369-15-122 [published Online First: 2014/07/30]  
43  
44  
45  
46  
47  
48  
49  
50  
51  
52  
53  
54  
55  
56  
57  
58  
59  
60



**Figure legend**

Figure 1. Prevalence of major CVD risk factors, renal diseases in different levels of serum uric acid.

Prevalence of obesity(A), hypertension(B), diabetes mellitus(C), dyslipidemia(D), chronic kidney disease (E) and nephrolithiasis(F) in different levels of serum uric acid. The gender-specific quartiles of uric acid (mg/dL), Q1:males (M)  $\leq 4.9$ , females (F)  $\leq 3.9$ ; Q2: M 5.0-5.9, F 4.0-4.9; Q3: M 6.0-6.9, F 5.0-5.9; Q4: M  $\geq 7.0$ , F  $\geq 6.0$ .

For peer review only

**Table 1.** Clinical characteristics of participants in quartiles of serum uric acid level.

|                                     | Men (n=15300)   |                    |                    |                 |                      | Women (n=11876) |                    |                    |                 |                      |
|-------------------------------------|-----------------|--------------------|--------------------|-----------------|----------------------|-----------------|--------------------|--------------------|-----------------|----------------------|
|                                     | Q1<br>≤4.9mg/dl | Q2<br>5.0-5.9mg/dl | Q3<br>6.0-6.9mg/dl | Q4<br>≥7.0mg/dl | P-value<br>for trend | Q1<br>≤3.9mg/dl | Q2<br>4.0-4.9mg/dl | Q3<br>5.0-5.9mg/dl | Q4<br>≥6.0mg/dl | P-value<br>for trend |
| N(%)                                | 2929(19.1%)     | 4720(30.8%)        | 4236(27.7%)        | 3415(22.3%)     | -                    | 3355(28.3%)     | 4553(38.3%)        | 2645(22.3%)        | 1323(11.1%)     | -                    |
| Comorbidities                       |                 |                    |                    |                 |                      |                 |                    |                    |                 |                      |
| Obesity (n, %)                      | 194(6.6%)       | 450(9.5%)          | 620(14.6%)         | 814(23.8%)      | < 0.001              | 133(4.0%)       | 364(8.0%)          | 380(14.4%)         | 315(23.8%)      | < 0.001              |
| Hypertension (n, %)                 | 809(27.6%)      | 1215(25.7%)        | 1289(30.4%)        | 1220(35.7%)     | < 0.001              | 554(16.5%)      | 1013(22.2%)        | 785(29.7%)         | 572(43.2%)      | < 0.001              |
| Diabetes mellitus (n, %)            | 351(12.0%)      | 306(6.5%)          | 224(5.3%)          | 168(4.9%)       | < 0.001              | 125(3.7%)       | 170(3.7%)          | 154(5.8%)          | 132(10.0%)      | < 0.001              |
| Dyslipidemia (n, %)                 | 735(25.1%)      | 1567(33.2%)        | 1732(40.9%)        | 1854(54.3%)     | < 0.001              | 394(11.7%)      | 866(19.0%)         | 782(29.6%)         | 606(45.8%)      | < 0.001              |
| Chronic kidney disease (n, %)       | 48(1.6%)        | 114(2.4%)          | 138(3.3%)          | 238(7.0%)       | < 0.001              | 25(0.7%)        | 78(1.7%)           | 105(4.0%)          | 171(12.9%)      | < 0.001              |
| Nephrolithiasis (n, %)              | 384(13.1%)      | 717(15.2%)         | 653(15.4%)         | 634(18.6%)      | < 0.001              | 368(11.0%)      | 484(10.6%)         | 372(14.1%)         | 224(16.9%)      | < 0.001              |
| Biochemical variables               |                 |                    |                    |                 |                      |                 |                    |                    |                 |                      |
| Age                                 | 50.08±15.49     | 48.00±15.57        | 47.24±15.62        | 47.31±15.76     | < 0.001              | 46.78±14.02     | 48.79±14.88        | 52.14±15.44        | 57.79±15.34     | < 0.001              |
| BMI (kg/m <sup>2</sup> )            | 23.29±3.06      | 24.11±3.07         | 24.81±3.14         | 25.96±3.25      | < 0.001              | 22.14±3.00      | 23.10±3.31         | 24.32±3.53         | 25.66±3.93      | < 0.001              |
| SBP (mmHg)                          | 126.61±18.21    | 126.22±17.42       | 127.70±18.10       | 130.24±18.18    | < 0.001              | 120.26±18.26    | 123.37±19.28       | 128.36±20.48       | 135.02±21.25    | < 0.001              |
| DBP (mmHg)                          | 78.98±11.54     | 78.74±11.09        | 80.16±11.82        | 81.71±11.85     | < 0.001              | 73.23±10.52     | 74.98±10.99        | 77.16±11.25        | 79.02±11.87     | < 0.001              |
| FPG (mmol/L)                        | 5.65±1.87       | 5.36±1.35          | 5.33±1.21          | 5.33±1.07       | < 0.001              | 5.08±1.22       | 5.12±1.12          | 5.29±1.22          | 5.57±1.28       | < 0.001              |
| TC (mmol/L)                         | 4.52±0.88       | 4.58±0.86          | 4.71±0.89          | 4.87±0.91       | < 0.001              | 4.64±0.91       | 4.82±0.93          | 5.00±0.94          | 5.17±1.04       | < 0.001              |
| TG (mmol/L)                         | 1.28±1.27       | 1.45±1.14          | 1.72±1.46          | 2.14±1.71       | < 0.001              | 0.96±0.59       | 1.19±0.76          | 1.46±0.98          | 1.97±1.61       | < 0.001              |
| HDL-C (mmol/L)                      | 1.32±0.31       | 1.25±0.28          | 1.22±0.28          | 1.17±0.26       | < 0.001              | 1.59±0.35       | 1.50±0.34          | 1.42±0.32          | 1.31±0.31       | < 0.001              |
| LDL-C (mmol/L)                      | 2.77±0.76       | 2.88±0.76          | 2.95±0.77          | 3.04±0.81       | < 0.001              | 2.71±0.77       | 2.89±0.79          | 3.07±0.81          | 3.11±0.86       | < 0.001              |
| eGFR (ml/(min*1.73m <sup>2</sup> )) | 92.46±20.66     | 89.41±19.32        | 87.74±19.50        | 84.85±20.04     | < 0.001              | 100.14±23.03    | 97.08±23.89        | 93.16±23.98        | 85.54±25.15     | < 0.001              |
| Cr (umol / L)                       | 80.90±18.37     | 83.61±14.59        | 85.39±14.70        | 88.94±22.63     | < 0.001              | 62.18±10.80     | 63.83±12.03        | 65.68±13.25        | 71.34±28.69     | < 0.001              |
| BUN (mmol/L)                        | 5.19±1.31       | 5.26±1.22          | 5.31±1.25          | 5.43±1.56       | < 0.001              | 4.57±1.20       | 4.84±1.23          | 5.11±1.27          | 5.55±1.82       | < 0.001              |

Date are expressed as the mean±SE, percentages. Abbreviations: BMI: body mass index, SBP: systolic blood pressure, DBP: diastolic blood pressure, FPG: fasting plasma glucose, TC: total cholesterol, TG: triglyceride, HDL-C: high density lipoprotein cholesterol, LDL-C: low density lipoprotein cholesterol, eGFR: estimated glomerular filtration rate. Cr: creatinine, BUN: blood urea nitrogen.

**Table 2.** Correlation coefficients between serum uric acid and various parameters.

| Variable                            | Men    |         | Women  |         | Total  |         |
|-------------------------------------|--------|---------|--------|---------|--------|---------|
|                                     | r      | P-value | r      | P-value | r      | P-value |
| Age                                 | -0.059 | < 0.001 | 0.227  | < 0.001 | 0.014  | 0.020   |
| BMI (kg/m <sup>2</sup> )            | 0.289  | < 0.001 | 0.327  | < 0.001 | 0.343  | < 0.001 |
| SBP (mmHg)                          | 0.075  | < 0.001 | 0.234  | < 0.001 | 0.158  | < 0.001 |
| DBP (mmHg)                          | 0.091  | < 0.001 | 0.166  | < 0.001 | 0.197  | < 0.001 |
| FPG (mmol/L)                        | -0.072 | < 0.001 | 0.124  | < 0.001 | 0.039  | < 0.001 |
| TC (mmol/L)                         | 0.148  | < 0.001 | 0.185  | < 0.001 | 0.091  | < 0.001 |
| TG (mmol/L)                         | 0.221  | < 0.001 | 0.326  | < 0.001 | 0.290  | < 0.001 |
| HDL-C (mmol/L)                      | -0.177 | < 0.001 | -0.263 | < 0.001 | -0.357 | < 0.001 |
| LDL-C (mmol/L)                      | 0.120  | < 0.001 | 0.181  | < 0.001 | 0.127  | < 0.001 |
| eGFR (ml/(min*1.73m <sup>2</sup> )) | -0.140 | < 0.001 | -0.194 | < 0.001 | -0.219 | < 0.001 |

Abbreviations: BMI: body mass index, SBP: systolic blood pressure, DBP: diastolic blood pressure, FPG: fasting plasma glucose, TC: total cholesterol, TG: triglyceride, HDL-C: high density lipoprotein cholesterol, LDL-C: low density lipoprotein cholesterol, eGFR: estimated glomerular filtration rate.

**Table 3.** The odds ratio for hyperuricemia according to different status of parameters of men and women.

|                                     | Men                 |         |                     |         | Women                 |         |                     |         |
|-------------------------------------|---------------------|---------|---------------------|---------|-----------------------|---------|---------------------|---------|
|                                     | Unadjusted          |         | Full-adjusted       |         | Unadjusted            |         | Full-adjusted       |         |
|                                     | OR (95%CI)          | P-value | OR (95%CI)          | P-value | OR (95%CI)            | P-value | OR (95%CI)          | P-value |
| BMI (kg/m <sup>2</sup> )            |                     |         |                     |         |                       |         |                     |         |
| 18.5 ≤BMI<24.0 (Ref.)               |                     |         |                     |         |                       |         |                     |         |
| BMI<18.5                            | 0.502 (0.337-0.747) | 0.001   | 0.558 (0.374-0.835) | 0.004   | 0.502 (0.322-0.784)   | 0.002   | 0.636 (0.403-1.005) | 0.052   |
| 24.0≤BMI<28.0                       | 2.165 (1.978-2.368) | < 0.001 | 1.878 (1.707-2.065) | < 0.001 | 2.732 (2.392-3.121)   | < 0.001 | 1.906 (1.649-2.203) | < 0.001 |
| BMI≥28.0                            | 3.972 (2.548-4.448) | < 0.001 | 3.102 (2.745-3.507) | < 0.001 | 5.077 (4.323-5.962)   | < 0.001 | 3.126 (2.611-3.743) | < 0.001 |
| Blood pressure (mmHg)               |                     |         |                     |         |                       |         |                     |         |
| Normotensive (Ref.)                 |                     |         |                     |         |                       |         |                     |         |
| Pre-HT                              | 1.304 (1.185-1.436) | < 0.001 | 1.138 (1.028-1.260) | 0.013   | 1.958 (1.682-2.280)   | < 0.001 | 1.129 (0.953-1.337) | 0.159   |
| Grade1 HT                           | 1.663 (1.493-1.853) | < 0.001 | 1.350 (1.195-1.525) | < 0.001 | 3.321 (2.825-3.903)   | < 0.001 | 1.328 (1.094-1.612) | 0.004   |
| Grade2/3 HT                         | 1.716 (1.491-1.976) | < 0.001 | 1.393 (1.186-1.635) | < 0.001 | 4.887 (4.018-5.945)   | < 0.001 | 1.480 (1.162-1.885) | 0.002   |
| FPG (mmol/L)                        |                     |         |                     |         |                       |         |                     |         |
| FPG<6.1 (Ref.)                      |                     |         |                     |         |                       |         |                     |         |
| 6.1≤FPG<7                           | 1.188 (1.026-1.375) | 0.021   | 0.921 (0.785-1.081) | 0.313   | 2.612 (2.126-3.209)   | < 0.001 | 1.221 (0.972-1.535) | 0.087   |
| FPG≥7                               | 0.655 (0.552-0.776) | < 0.001 | 0.410 (0.340-0.495) | < 0.001 | 2.673 (2.179-3.278)   | < 0.001 | 0.793 (0.624-1.009) | 0.059   |
| Cholesterol (mmol/L)                |                     |         |                     |         |                       |         |                     |         |
| TC≤6.22 (Ref.)                      |                     |         |                     |         |                       |         |                     |         |
| TC>6.22                             | 1.885 (1.610-2.207) | < 0.001 | 1.072 (0.874-1.315) | 0.502   | 2.044 (1.722-2.426)   | < 0.001 | 1.070 (0.835-1.372) | 0.591   |
| Triglyceride (mmol/L)               |                     |         |                     |         |                       |         |                     |         |
| TG≤2.26 (Ref.)                      |                     |         |                     |         |                       |         |                     |         |
| TG>2.26                             | 2.881 (2.636-3.148) | < 0.001 | 2.242 (2.029-2.477) | < 0.001 | 4.603 (4.994-5.305)   | < 0.001 | 2.513 (2.129-2.967) | < 0.001 |
| HDL-C (mmol/L)                      |                     |         |                     |         |                       |         |                     |         |
| HDL-C≥1.04 (Ref.)                   |                     |         |                     |         |                       |         |                     |         |
| HDL-C<1.04                          | 1.651 (1.519-1.795) | < 0.001 | 1.097 (0.999-1.205) | 0.054   | 3.404 (2.898-3.999)   | < 0.001 | 1.929 (1.601-2.324) | < 0.001 |
| LDL-C (mmol/L)                      |                     |         |                     |         |                       |         |                     |         |
| LDL-C≤4.14 (Ref.)                   |                     |         |                     |         |                       |         |                     |         |
| LDL-C>4.14                          | 1.737 (1.506-2.003) | < 0.001 | 1.522 (1.271-1.822) | < 0.001 | 1.871 (1.556-2.251)   | < 0.001 | 1.299 (1.002-1.686) | 0.049   |
| eGFR (ml/(min*1.73m <sup>2</sup> )) |                     |         |                     |         |                       |         |                     |         |
| eGFR≥90 (Ref.)                      |                     |         |                     |         |                       |         |                     |         |
| 60≤eGFR<89                          | 1.175 (1.084-1.273) | < 0.001 | 1.351 (1.235-1.477) | < 0.001 | 1.672 (1.479-1.891)   | < 0.001 | 1.580 (1.377-1.814) | < 0.001 |
| eGFR≤59                             | 3.185 (2.657-3.818) | < 0.001 | 4.461 (3.621-5.496) | < 0.001 | 9.569 (7.633-11.949)  | < 0.001 | 6.453 (4.982-8.356) | < 0.001 |
| Albuminuria                         |                     |         |                     |         |                       |         |                     |         |
| -/+ (Ref.)                          |                     |         |                     |         |                       |         |                     |         |
| +                                   | 1.256 (0.888-1.775) | 0.198   | 0.899 (0.615-1.314) | 0.584   | 6.020 (3.995-9.072)   | < 0.001 | 2.899 (1.791-4.694) | < 0.001 |
| ++                                  | 2.123 (1.464-3.078) | < 0.001 | 1.392 (0.923-2.100) | 0.115   | 3.203 (1.882-5.449)   | < 0.001 | 1.521 (0.824-2.807) | 0.180   |
| +++                                 | 3.166 (1.990-5.036) | < 0.001 | 2.335 (1.393-3.913) | 0.001   | 10.837 (6.108-19.225) | < 0.001 | 4.634 (2.399-8.953) | < 0.001 |
| Urinary pH                          |                     |         |                     |         |                       |         |                     |         |
| 6≤pH≤7 (Ref.)                       |                     |         |                     |         |                       |         |                     |         |
| pH<6                                | 1.490 (1.375-1.615) | < 0.001 | 1.602 (1.464-1.752) | < 0.001 | 2.108 (1.875-2.371)   | < 0.001 | 1.839 (1.613-2.098) | < 0.001 |
| pH>7                                | 0.534 (0.415-0.688) | < 0.001 | 0.581 (0.447-0.754) | < 0.001 | 0.653 (0.466-0.915)   | 0.013   | 0.741 (0.521-1.053) | 0.094   |
| Nephrolithiasis                     |                     |         |                     |         |                       |         |                     |         |
| No (Ref.)                           |                     |         |                     |         |                       |         |                     |         |
| Yes                                 | 1.317 (1.191-1.455) | < 0.001 | 1.250 (1.121-1.392) | < 0.001 | 1.553 (1.330-1.815)   | < 0.001 | 1.214 (1.021-1.443) | 0.028   |

Abbreviations: BMI: body mass index, FPG: fasting plasma glucose, TC: total cholesterol, TG: triglyceride, HDL-C: high density lipoprotein cholesterol, LDL-C: low density lipoprotein cholesterol, eGFR: estimated glomerular filtration rate. Blood pressure (mmHg): normotensive: SBP<120 and DBP<80; pre-HT: SBP of 120-139 and/or DBP of 80-89; Grade1 HT: SBP of 140-159 and/or DBP of 90-99; Grade2/3 HT: SBP≥160 and/or DBP≥100

**Table 4.** The association between SUA and Obesity, hypertension, Diabetes mellitus, Dyslipidemia, CKD, Nephrolithiasis in men.

|                        | Q1      | Q2    |             |         | Q3    |             |         | Q4    |             |         |
|------------------------|---------|-------|-------------|---------|-------|-------------|---------|-------|-------------|---------|
|                        | -       | OR    | 95%CI       | P-value | OR    | 95%CI       | P-value | OR    | 95%CI       | P-value |
| Obesity                |         |       |             |         |       |             |         |       |             |         |
| Model1                 | 1(Ref.) | 1.487 | 1.248-1.772 | < 0.001 | 2.420 | 2.044-2.866 | < 0.001 | 4.418 | 3.743-5.214 | < 0.001 |
| Model2 <sup>a</sup>    | 1(Ref.) | 1.355 | 1.130-1.625 | 0.001   | 1.955 | 1.637-2.334 | < 0.001 | 3.102 | 2.600-3.701 | < 0.001 |
| Model3 <sup>1</sup>    | 1(Ref.) | 1.362 | 1.135-1.635 | 0.001   | 1.971 | 1.649-2.356 | < 0.001 | 3.115 | 2.604-3.727 | < 0.001 |
| Hypertension           |         |       |             |         |       |             |         |       |             |         |
| Model1                 | 1(Ref.) | 0.999 | 0.895-1.115 | 0.981   | 1.351 | 1.209-1.509 | < 0.001 | 1.769 | 1.577-1.983 | < 0.001 |
| Model2 <sup>b</sup>    | 1(Ref.) | 0.934 | 0.832-1.048 | 0.246   | 1.146 | 1.019-1.289 | 0.023   | 1.266 | 1.118-1.434 | < 0.001 |
| Model3 <sup>2</sup>    | 1(Ref.) | 0.940 | 0.838-1.056 | 0.298   | 1.164 | 1.034-1.310 | 0.012   | 1.290 | 1.136-1.465 | < 0.001 |
| Diabetes mellitus      |         |       |             |         |       |             |         |       |             |         |
| Model1                 | 1(Ref.) | 0.539 | 0.457-0.636 | < 0.001 | 0.445 | 0.372-0.531 | < 0.001 | 0.407 | 0.335-0.495 | < 0.001 |
| Model2 <sup>c</sup>    | 1(Ref.) | 0.434 | 0.366-0.516 | < 0.001 | 0.289 | 0.239-0.349 | < 0.001 | 0.210 | 0.170-0.259 | < 0.001 |
| Model3 <sup>3</sup>    | 1(Ref.) | 0.442 | 0.371-0.526 | < 0.001 | 0.293 | 0.241-0.356 | < 0.001 | 0.205 | 0.165-0.255 | < 0.001 |
| Dyslipidemia           |         |       |             |         |       |             |         |       |             |         |
| Model1                 | 1(Ref.) | 1.510 | 1.361-1.674 | < 0.001 | 2.116 | 1.907-2.348 | < 0.001 | 3.639 | 3.267-4.053 | < 0.001 |
| Model2 <sup>d</sup>    | 1(Ref.) | 1.428 | 1.282-1.592 | < 0.001 | 1.812 | 1.624-2.023 | < 0.001 | 2.675 | 2.385-3.002 | < 0.001 |
| Model3 <sup>4</sup>    | 1(Ref.) | 1.408 | 1.262-1.570 | < 0.001 | 1.755 | 1.571-1.961 | < 0.001 | 2.503 | 2.226-2.815 | < 0.001 |
| Chronic kidney disease |         |       |             |         |       |             |         |       |             |         |
| Model1                 | 1(Ref.) | 1.698 | 1.199-2.404 | 0.003   | 2.458 | 1.749-3.454 | < 0.001 | 5.883 | 4.254-8.136 | < 0.001 |
| Model2 <sup>e</sup>    | 1(Ref.) | 1.895 | 1.329-2.700 | < 0.001 | 2.745 | 1.935-3.896 | < 0.001 | 6.800 | 4.829-9.576 | < 0.001 |
| Model3 <sup>5</sup>    | 1(Ref.) | 1.894 | 1.325-2.707 | < 0.001 | 2.795 | 1.966-3.975 | < 0.001 | 6.962 | 4.921-9.851 | < 0.001 |
| Nephrolithiasis        |         |       |             |         |       |             |         |       |             |         |
| Model1                 | 1(Ref.) | 1.248 | 1.090-1.428 | 0.001   | 1.292 | 1.126-1.482 | < 0.001 | 1.619 | 1.409-1.861 | < 0.001 |
| Model2 <sup>f</sup>    | 1(Ref.) | 1.163 | 1.015-1.334 | 0.030   | 1.150 | 0.999-1.324 | 0.052   | 1.346 | 1.162-1.560 | < 0.001 |
| Model3 <sup>6</sup>    | 1(Ref.) | 1.225 | 1.067-1.406 | 0.004   | 1.229 | 1.065-1.418 | 0.005   | 1.480 | 1.272-1.722 | < 0.001 |

Model 1: adjusted for age

<sup>a</sup>Model 2: adjusted for variables included in model1 and SBP, DBP, FPG, TC, TG, HDL-C, LDL-C; <sup>b</sup>Model2: adjusted for variables included in model1 and BMI, FPG, TC, TG, HDL-C, LDL-C; <sup>c</sup>Model2: adjusted for variables included in model1 and BMI, SBP, DBP, FPG; <sup>d</sup>Model2: adjusted for variables included in model1 and BMI, SBP, DBP, FPG, TC, TG, HDL-C, LDL-C; <sup>e</sup>Model2: adjusted for variables included in model1 and BMI, SBP, DBP, FPG, TC, TG, HDL-C, LDL-C; <sup>f</sup>Model2: adjusted for variables included in model1 and BMI, SBP, DBP, FPG, TC, TG, HDL-C, LDL-C.

<sup>1</sup>Model 3: adjusted for variables included in model2<sup>a</sup> and eGFR, urine Ph, albuminuria, nephrolithiasis; <sup>2</sup>Model 3: adjusted for variables included in model2<sup>b</sup> and eGFR, urine Ph, albuminuria, nephrolithiasis; <sup>3</sup>Model 3: adjusted for variables included in model2<sup>c</sup> and eGFR, urine Ph, albuminuria, nephrolithiasis; <sup>4</sup>Model 3: adjusted for variables included in model2<sup>d</sup> and eGFR, urine Ph, albuminuria, nephrolithiasis; <sup>5</sup>Model 3: adjusted for variables included in model2<sup>e</sup> and urine Ph, albuminuria, nephrolithiasis; <sup>6</sup>Model 3: adjusted for variables included in model2<sup>f</sup> and eGFR, urine Ph, albuminuria.

Abbreviations: BMI: body mass index, SBP: systolic blood pressure, DBP: diastolic blood pressure, FPG: fasting plasma glucose, TC: total cholesterol, TG: triglyceride, HDL-C: high density lipoprotein cholesterol, LDL-C: low density lipoprotein cholesterol, eGFR: estimated glomerular filtration rate.

**Table 5.** The association between SUA and Obesity, hypertension, Diabetes mellitus, Dyslipidemia, CKD, Nephrolithiasis in women.

|                        | Q1      | Q2    |             |         | Q3    |             |         | Q4     |              |         |
|------------------------|---------|-------|-------------|---------|-------|-------------|---------|--------|--------------|---------|
|                        | -       | OR    | 95%CI       | P-value | OR    | 95%CI       | P-value | OR     | 95%CI        | P-value |
| Obesity                |         |       |             |         |       |             |         |        |              |         |
| Model1                 | 1(Ref.) | 2.000 | 1.630-2.455 | < 0.001 | 3.568 | 2.902-4.387 | < 0.001 | 5.837  | 4.687-7.269  | < 0.001 |
| Model2 <sup>a</sup>    | 1(Ref.) | 1.652 | 1.338-2.041 | < 0.001 | 2.453 | 1.976-3.045 | < 0.001 | 3.560  | 2.818-4.497  | < 0.001 |
| Model3 <sup>1</sup>    | 1(Ref.) | 1.679 | 1.358-2.076 | < 0.001 | 2.498 | 2.008-3.107 | < 0.001 | 3.755  | 2.956-4.769  | < 0.001 |
| Hypertension           |         |       |             |         |       |             |         |        |              |         |
| Model1                 | 1(Ref.) | 1.285 | 1.133-1.457 | < 0.001 | 1.565 | 1.365-1.794 | < 0.001 | 2.109  | 1.799-2.472  | < 0.001 |
| Model2 <sup>b</sup>    | 1(Ref.) | 1.110 | 0.972-1.267 | 0.123   | 1.120 | 0.967-1.298 | 0.130   | 1.244  | 1.045-1.480  | 0.014   |
| Model3 <sup>2</sup>    | 1(Ref.) | 1.127 | 0.987-1.287 | 0.078   | 1.161 | 1.001-1.347 | 0.049   | 1.287  | 1.075-1.539  | 0.006   |
| Diabetes mellitus      |         |       |             |         |       |             |         |        |              |         |
| Model1                 | 1(Ref.) | 0.868 | 0.683-1.104 | 0.249   | 1.146 | 0.893-1.469 | 0.284   | 1.536  | 1.178-2.004  | 0.002   |
| Model2 <sup>c</sup>    | 1(Ref.) | 0.614 | 0.477-0.791 | < 0.001 | 0.609 | 0.466-0.797 | < 0.001 | 0.588  | 0.437-0.791  | < 0.001 |
| Model3 <sup>3</sup>    | 1(Ref.) | 0.596 | 0.462-0.770 | < 0.001 | 0.566 | 0.431-0.744 | < 0.001 | 0.514  | 0.377-0.701  | < 0.001 |
| Dyslipidemia           |         |       |             |         |       |             |         |        |              |         |
| Model1                 | 1(Ref.) | 1.670 | 1.466-1.903 | < 0.001 | 2.735 | 2.385-3.136 | < 0.001 | 4.761  | 4.075-5.561  | < 0.001 |
| Model2 <sup>d</sup>    | 1(Ref.) | 1.583 | 1.386-1.809 | < 0.001 | 2.385 | 2.071-2.747 | < 0.001 | 3.836  | 3.265-4.508  | < 0.001 |
| Model3 <sup>4</sup>    | 1(Ref.) | 1.575 | 1.378-1.800 | < 0.001 | 2.318 | 2.010-2.673 | < 0.001 | 3.675  | 3.114-4.336  | < 0.001 |
| Chronic kidney disease |         |       |             |         |       |             |         |        |              |         |
| Model1                 | 1(Ref.) | 1.962 | 1.241-3.102 | 0.004   | 3.676 | 2.353-5.745 | < 0.001 | 9.740  | 6.306-15.045 | < 0.001 |
| Model2 <sup>e</sup>    | 1(Ref.) | 2.092 | 1.317-3.322 | 0.002   | 4.096 | 2.591-6.475 | < 0.001 | 11.510 | 7.282-18.193 | < 0.001 |
| Model3 <sup>5</sup>    | 1(Ref.) | 2.051 | 1.291-3.260 | 0.002   | 4.189 | 2.645-6.634 | < 0.001 | 11.508 | 7.242-18.288 | < 0.001 |
| Nephrolithiasis        |         |       |             |         |       |             |         |        |              |         |
| Model1                 | 1(Ref.) | 0.922 | 0.798-1.065 | 0.268   | 1.183 | 1.012-1.383 | 0.035   | 1.312  | 1.090-1.580  | 0.004   |
| Model2 <sup>f</sup>    | 1(Ref.) | 0.853 | 0.736-0.988 | 0.034   | 1.022 | 0.868-1.203 | 0.797   | 1.034  | 0.847-1.262  | 0.742   |
| Model3 <sup>6</sup>    | 1(Ref.) | 0.889 | 0.766-1.032 | 0.123   | 1.111 | 0.940-1.313 | 0.216   | 1.239  | 1.008-1.522  | 0.042   |

Model 1: adjusted for age

<sup>a</sup>Model 2: adjusted for variables included in model1 and SBP, DBP, FPG, TC, TG, HDL-C, LDL-C; <sup>b</sup>Model2: adjusted for variables included in model1 and BMI, FPG, TC, TG, HDL-C, LDL-C; <sup>c</sup>Model2: adjusted for variables included in model1 and BMI, SBP, DBP, FPG; <sup>d</sup>Model2: adjusted for variables included in model1 and BMI, SBP, DBP, FPG, TC, TG, HDL-C, LDL-C; <sup>e</sup>Model2: adjusted for variables included in model1 and BMI, SBP, DBP, FPG, TC, TG, HDL-C, LDL-C; <sup>f</sup>Model2: adjusted for variables included in model1 and BMI, SBP, DBP, FPG, TC, TG, HDL-C, LDL-C.

<sup>1</sup>Model 3: adjusted for variables included in model2<sup>a</sup> and eGFR, urine Ph, albuminuria, nephrolithiasis; <sup>2</sup>Model 3: adjusted for variables included in model2<sup>b</sup> and eGFR, urine Ph, albuminuria, nephrolithiasis; <sup>3</sup>Model 3: adjusted for variables included in model2<sup>c</sup> and eGFR, urine Ph, albuminuria, nephrolithiasis; <sup>4</sup>Model 3: adjusted for variables included in model2<sup>d</sup> and eGFR, urine Ph, albuminuria, nephrolithiasis; <sup>5</sup>Model 3: adjusted for variables included in model2<sup>e</sup> and urine Ph, albuminuria, nephrolithiasis; <sup>6</sup>Model 3: adjusted for variables included in model2<sup>f</sup> and eGFR, urine Ph, albuminuria.

Abbreviations: BMI: body mass index, SBP: systolic blood pressure, DBP: diastolic blood pressure, FPG: fasting plasma glucose, TC: total cholesterol, TG: triglyceride, HDL-C: high density lipoprotein cholesterol, LDL-C: low density lipoprotein cholesterol, eGFR: estimated glomerular filtration rate.

**Table 6.** The association between hyperuricemia and clustered CVD risk factors.

| Clustered CVD risk factors | Men        |             |         |              |             |         | Women      |              |         |              |             |         |
|----------------------------|------------|-------------|---------|--------------|-------------|---------|------------|--------------|---------|--------------|-------------|---------|
|                            | Unadjusted |             |         | Age-adjusted |             |         | Unadjusted |              |         | Age-adjusted |             |         |
|                            | OR         | 95%CI       | P-value | OR           | 95%CI       | P-value | OR         | 95%CI        | P-value | OR           | 95%CI       | P-value |
| 0                          | Ref.       |             |         |              |             |         |            |              |         |              |             |         |
| 1                          | 1.948      | 1.774-2.140 | < 0.001 | 2.119        | 1.926-2.332 | < 0.001 | 3.337      | 2.887-3.856  | < 0.001 | 2.642        | 2.266-3.081 | < 0.001 |
| 2                          | 2.977      | 2.671-3.318 | < 0.001 | 3.390        | 3.029-3.794 | < 0.001 | 6.116      | 5.199-7.195  | < 0.001 | 4.447        | 3.728-5.304 | < 0.001 |
| ≥3                         | 3.343      | 2.867-3.897 | < 0.001 | 3.804        | 3.252-4.450 | < 0.001 | 8.848      | 7.070-11.075 | < 0.001 | 6.265        | 4.945-7.938 | < 0.001 |
| p value for trend          | < 0.001    |             |         | < 0.001      |             |         | < 0.001    |              |         | < 0.001      |             |         |

Clustered CVD risk factors included obesity, hypertension, diabetes mellitus, dyslipidemia

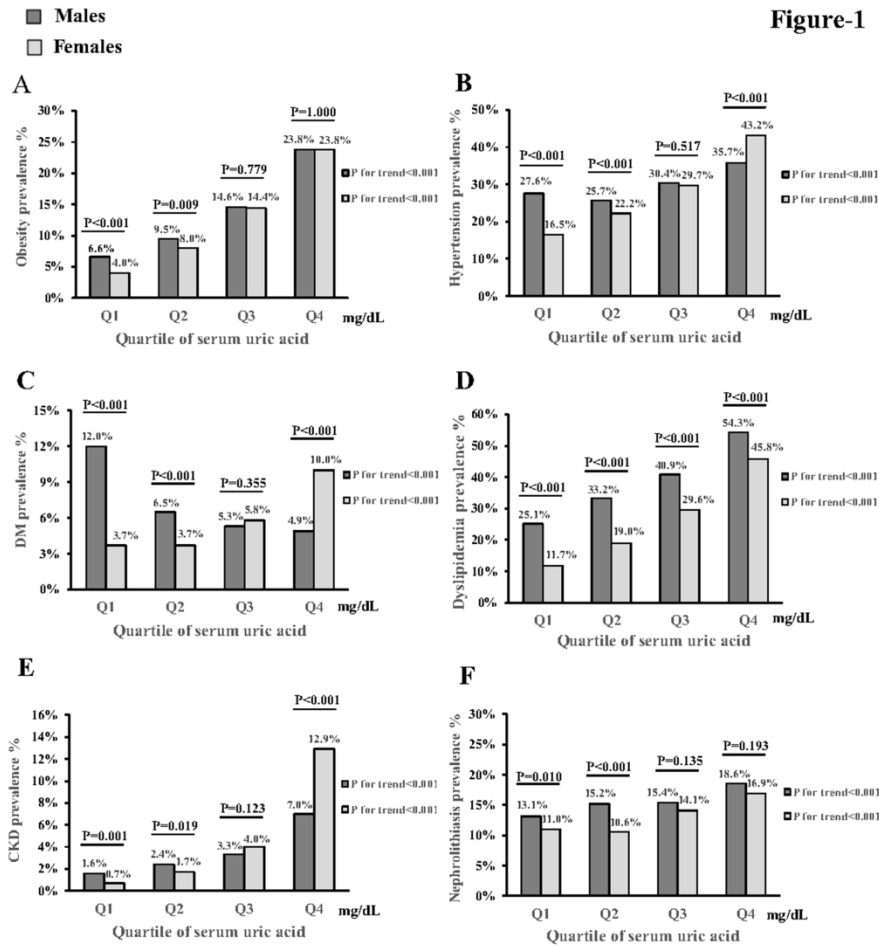

Figure 1. Prevalence of major CVD risk factors, renal diseases in different levels of serum uric acid. Prevalence of obesity(A), hypertension(B), diabetes mellitus(C), dyslipidemia(D), chronic kidney disease (E) and nephrolithiasis(F) in different levels of serum uric acid. The gender-specific quartiles of uric acid (mg/dL), Q1:males (M)  $\leq 4.9$ , females (F)  $\leq 3.9$ ; Q2: M 5.0-5.9, F 4.0-4.9; Q3: M 6.0-6.9, F 5.0-5.9; Q4: M  $\geq 7.0$ , F  $\geq 6.0$ .

190x254mm (300 x 300 DPI)



# BMJ Open

## The relationship between serum uric acid and clustering of cardiovascular disease risk factors, renal disorders among Shanghai population: a multi-center and cross-sectional study

|                                 |                                                                                                                                                                                                                                                                                                                                                                                                                                                                                                                                                                                                                                                                                                                                                                                                                                                                                                                                                                                                                                                                                                                                                                                                                                 |
|---------------------------------|---------------------------------------------------------------------------------------------------------------------------------------------------------------------------------------------------------------------------------------------------------------------------------------------------------------------------------------------------------------------------------------------------------------------------------------------------------------------------------------------------------------------------------------------------------------------------------------------------------------------------------------------------------------------------------------------------------------------------------------------------------------------------------------------------------------------------------------------------------------------------------------------------------------------------------------------------------------------------------------------------------------------------------------------------------------------------------------------------------------------------------------------------------------------------------------------------------------------------------|
| Journal:                        | <i>BMJ Open</i>                                                                                                                                                                                                                                                                                                                                                                                                                                                                                                                                                                                                                                                                                                                                                                                                                                                                                                                                                                                                                                                                                                                                                                                                                 |
| Manuscript ID                   | bmjopen-2018-025453.R1                                                                                                                                                                                                                                                                                                                                                                                                                                                                                                                                                                                                                                                                                                                                                                                                                                                                                                                                                                                                                                                                                                                                                                                                          |
| Article Type:                   | Research                                                                                                                                                                                                                                                                                                                                                                                                                                                                                                                                                                                                                                                                                                                                                                                                                                                                                                                                                                                                                                                                                                                                                                                                                        |
| Date Submitted by the Author:   | 03-Dec-2018                                                                                                                                                                                                                                                                                                                                                                                                                                                                                                                                                                                                                                                                                                                                                                                                                                                                                                                                                                                                                                                                                                                                                                                                                     |
| Complete List of Authors:       | Tao, Min; Department of Nephrology, Shanghai East Hospital, Tongji University School of Medicine<br>Pi, Xiaoling; Department of Internal Medicine, Pudong New District Gongli Hospital<br>Ma, Xiaoyan; Department of Nephrology, Shanghai East Hospital, Tongji University School of Medicine; Department of Nephrology, Baoshan Branch of First People's Hospital, Shanghai Jiaotong University<br>Shi, Yingfeng; Department of Nephrology, Shanghai East Hospital, Tongji University School of Medicine<br>Zhang, Yuzhen; Key Laboratory of Arrhythmias of the Ministry of Education of China, Research Center for Translational Medicine, Shanghai East Hospital, Tongji University School of Medicine<br>Gu, Hongwei; Department of Nephrology, Shanghai East Hospital, Tongji University School of Medicine<br>Chi, Yongbin; Department of Medical Laboratory, Pudong New District Gongli Hospital<br>Zhuang, Shougang; Department of Nephrology, Shanghai East Hospital, Tongji University School of Medicine; Department of Medicine, Rhode Island Hospital and Brown University School of Medicine<br>Liu, Na; Department of Nephrology, Shanghai East Hospital, Tongji University School of Medicine, Shanghai, China, |
| <b>Primary Subject Heading</b>: | Epidemiology                                                                                                                                                                                                                                                                                                                                                                                                                                                                                                                                                                                                                                                                                                                                                                                                                                                                                                                                                                                                                                                                                                                                                                                                                    |
| Secondary Subject Heading:      | Cardiovascular medicine, Renal medicine                                                                                                                                                                                                                                                                                                                                                                                                                                                                                                                                                                                                                                                                                                                                                                                                                                                                                                                                                                                                                                                                                                                                                                                         |
| Keywords:                       | Serum uric acid, cardiovascular disease risk factors, renal disorders                                                                                                                                                                                                                                                                                                                                                                                                                                                                                                                                                                                                                                                                                                                                                                                                                                                                                                                                                                                                                                                                                                                                                           |
|                                 |                                                                                                                                                                                                                                                                                                                                                                                                                                                                                                                                                                                                                                                                                                                                                                                                                                                                                                                                                                                                                                                                                                                                                                                                                                 |

SCHOLARONE™  
Manuscripts

1  
2  
3  
4 1 **The relationship between serum uric acid and clustering of cardiovascular disease risk factors,**  
5  
6  
7 2 **renal disorders among Shanghai population: a multi-center and cross-sectional study**

8  
9 3 Min Tao<sup>1\*</sup>, Xiaoling Pi<sup>2\*</sup>, Xiaoyan Ma<sup>1,3\*</sup>, Yingfeng Shi<sup>1</sup>, Yuzhen Zhang<sup>4</sup>, Hongwei Gu<sup>1</sup>, Yongbin Chi<sup>5</sup>,  
10  
11  
12 4 Shougang Zhuang<sup>1,6</sup>, Na Liu<sup>1</sup>  
13  
14  
15 5  
16

17 6 <sup>1</sup>Department of Nephrology, Shanghai East Hospital, Tongji University School of Medicine, Shanghai,  
18  
19  
20 7 China;  
21  
22

23 8 <sup>2</sup>Department of Internal Medicine, Pudong New District Gongli Hospital, Shanghai, China;  
24

25  
26 9 <sup>3</sup>Department of Nephrology, Baoshan Branch of First People's Hospital, Shanghai Jiaotong University,  
27  
28  
29 10 Shanghai, China  
30

31 11 <sup>4</sup>Key Laboratory of Arrhythmias of the Ministry of Education of China, Research Center for Translational  
32  
33  
34 12 Medicine, Shanghai East Hospital, Tongji University School of Medicine, Shanghai, China  
35

36  
37 13 <sup>5</sup>Department of Medical Laboratory, Pudong New District Gongli Hospital, Shanghai, China  
38

39 14 <sup>6</sup>Department of Medicine, Rhode Island Hospital and Brown University School of Medicine, Providence,  
40  
41  
42 15 RI, USA  
43  
44  
45 16

46  
47 17 \* Min Tao, Xiaoling Pi and Xiaoyan Ma contributed equally to this work.  
48  
49  
50 18  
51  
52

53 19 **Corresponding author: Na Liu, M.D., Ph.D.,** Department of Nephrology, Shanghai East Hospital,  
54  
55  
56 20 Tongji University School of Medicine, 150 Jimo road, Pudong new district, Shanghai 200120,  
57  
58 21 China. **E-mail:** naliubrown@163.com.  
59  
60

## ABSTRACT

**Objectives** To estimate the current prevalence of cardiovascular disease risk factors (CRFs) and renal disorders across serum uric acid (SUA) quartiles, and evaluate the relationships between SUA and CRFs, renal diseases in Shanghai population.

**Study design** Observational, cross-sectional study.

**Setting** Data were obtained from physical checkups of local residents at three hospitals in Shanghai.

**Participants** Residents were invited to take part in physical checkups and provided informed consents.

Exclusion criteria were diseases that resemble cancer, hepatic disease and other coexisting illnesses including autoimmune kidney diseases, renal artery stenosis, individuals treated with xanthine oxidase inhibitors and without complete information. There are 27176 individuals in our study.

**Primary and secondary outcome measures** Hyperuricemia was defined as SUA  $\geq 7$  mg/dL in males and  $\geq 6$  mg/dL in females or taking xanthine oxidase inhibitors. Subjects were divided into gender-specific quartiles. We estimate the prevalence of CRFs and renal disorders across SUA quartiles. The relationships between SUA and CRFs, renal disorders at different gender were evaluated with logistic regression analysis.

**Results:** There was a significant increase in the prevalence of major CRFs and renal diseases across SUA quartiles in separate analysis among men and women (all  $P$ -trend $<0.001$ ). After multiple adjustment, hyperuricemia positively correlated with obesity (Male OR=3.115,  $P<0.001$ ; Female OR=3.755,  $P<0.001$ ), hypertension (Male OR=1.290,  $P<0.001$ ; Female OR=1.287,  $P=0.006$ ), dyslipidemia (Male OR=2.503,  $P<0.001$ ; Female OR=3.675,  $P<0.001$ ), chronic kidney disease (Male OR=6.962,  $P<0.001$ ; Female OR=11.508,  $P<0.001$ ), nephrolithiasis (Male OR=1.480,  $P<0.001$ ; Female OR=1.239,  $P=0.042$ ),

1  
2  
3  
4 43 but negatively correlated with diabetes mellitus ((Male OR=0.205,  $P<0.001$ ; Female OR=0.514,  
5  
6  
7 44  $P<0.001$ )). Women had a stronger association between hyperuricemia and clustered CRFs as well as  
8  
9  
10 45 CKD than men.

11  
12 46 **Conclusions:** In Shanghai population, concomitant with the elevated level of SUA, the prevalence of  
13  
14  
15 47 CRFs and renal diseases was rising. Hyperuricemia was significantly associated with CRFs and renal  
16  
17  
18 48 disorders, especially in females.

19  
20 49 **KEY WORDS:** Serum uric acid, cardiovascular disease risk factors, renal disorders  
21  
22

## 23 50 24 25 26 51 **ARTICLE SUMMARY**

### 27 28 29 52 **Article focus**

- 30  
31 53 ● The current prevalence of cardiovascular disease risk factors (CRFs) and renal diseases across serum  
32  
33  
34 54 uric acid (SUA) quartiles.  
35  
36  
37 55 ● The relationships between SUA and CRFs, renal disorders in Shanghai population.  
38

### 39 56 **Key messages**

- 40  
41  
42 57 ● In Shanghai population, concomitant with the elevated level of serum uric acid, the prevalence rate of  
43  
44  
45 58 CRFs and renal diseases was rising.  
46  
47  
48 59 ● Hyperuricemia was significantly associated with cardiovascular disease (CVD) risk factors and renal  
49  
50 60 disorders, especially in females.  
51

### 52 53 61 **Strengths and limitations of this study**

- 54  
55  
56 62 ● There is a strict exclusion criteria based on medical histories and laboratory findings.  
57  
58 63 ● We conducted a multi-center study with large sample size which ensured sufficient power in  
59  
60

1  
2  
3  
4 64 obtaining the accurate prevalent rate of CRFs and renal diseases and analyzing the relationship  
5  
6  
7 65 between SUA and CRFs, renal disorders across SUA quartiles.  
8

9  
10 66 ● The relationship was analyzed in both sexes and we got a solid conclusion about the differences  
11  
12 67 between men and women.  
13

14  
15 68 ● It was a cross-section study and the results could not establish causative relationships between  
16  
17  
18 69 hyperuricemia and CRFs clustering and renal diseases.  
19

20 70 ● The data were from three medical centers' databases that lacked details in waist circumference,  
21  
22  
23 71 HOMA-IR (homeostasis model assessment of insulin resistance), smoking, drinking, lifestyles, diet  
24  
25  
26 72 and pharmacotherapy, which might affect the deviations of some clinical outcomes.  
27  
28  
29 73

30  
31 74  
32  
33  
34 75  
35  
36  
37 76  
38  
39 77  
40  
41  
42 78  
43  
44  
45 79  
46  
47  
48 80  
49

50 81  
51  
52  
53 82  
54  
55  
56 83  
57  
58 84  
59  
60

## INTRODUCTION

Uric acid (UA) is the final degradation product of purine metabolism in the liver, muscles and intestines.<sup>1</sup> A high level of serum uric acid (SUA) is correlated with multiple disorders such as metabolic syndrome, cardiovascular disease as well as kidney diseases.<sup>2-4</sup> The association between hyperuricemia and CVD risk factors has been widely focused since the last century.<sup>5</sup> There are various risk factors involved in CVDs, including age, sex, obesity, hypertension, diabetes mellitus, dyslipidemia, family history, smoking, depression and so on.<sup>6-8</sup> Numerous indexes of CVDs risk factors were closely associated with increased serum uric acid, such as body mass index (BMI), cholesterol, triglyceride, low-density lipoprotein (LDL), and high-density lipoprotein (HDL), systolic blood pressure (SBP), diastolic blood pressure (DBP), fasting plasma glucose (FPG).<sup>6-9</sup> However, the relationship between hyperuricemia and cardiovascular disease risk factors (CRFs) at different gender of Shanghai population has not been well studied. And the data from multiple clinical centers in China are extremely limited. In this study, we evaluated the prevalence of major CRFs (obesity, hypertension, diabetes mellitus, dyslipidemia) across SUA quartiles and analyzed the association of these factors with SUA level respectively in both men and women.

It has been documented that 70% of the daily UA production is excreted by the kidney.<sup>10</sup> UA tends to crystallize in low urine pH. Hyperuricemia reduces urine pH, and increases the risk of formation of urate stones.<sup>11</sup> Recent research indicated that serum uric acid level could predict the development of albuminuria.<sup>12-13</sup> And elevated serum uric acid level was significantly associated with estimated glomerular filtrate rate (eGFR) decline.<sup>14-15</sup> However, whether UA is a cause or an association to renal diseases is a question that still waits for further investigations. Thus, we assessed the prevalence of renal

diseases across SUA quartiles, and the relationship between serum uric acid and renal disorders in Shanghai population.

## METHODS

### Study population

The permanent residents aged between 16-98 years who participated in the health checkups during the period from January 2015 and December 2015 of three medical centers Shanghai East Hospital Affiliated to Tongji University School of Medicine, Pudong New District Gongli Hospital and Baoshan Branch of Shanghai First People's Hospital were invited in the study. After excluding subjects with incomplete data, cancer, hepatic disease or other coexisting illnesses including autoimmune kidney diseases, renal artery stenosis and subjects treated with xanthine oxidase inhibitors, 27176 participants were enrolled in our study.

### The primary outcomes

Hyperuricemia was defined as serum uric acid  $\geq 7$  mg/dL in males and  $\geq 6$  mg/dL in females or current use of xanthine oxidase inhibitors.<sup>16</sup> SUA was determined using the uricase-peroxidase method.

### Study definitions

Body mass index (BMI) was calculated as weight in kilograms divided by height in squared meters. According to WHO guidelines for the Asian Pacific population, normal weight was defined as  $18.5 \leq \text{BMI} < 24.0$  kg/m<sup>2</sup>, overweight was defined as  $24.0 \leq \text{BMI} < 28.0$  kg/m<sup>2</sup>, obesity was defined as  $\text{BMI} \geq 28.0$  kg/m<sup>2</sup>, underweight was defined as  $\text{BMI} < 18.5$  kg/m<sup>2</sup>.<sup>17</sup> Blood pressure measurements were taken according to the Joint National Committee VII criteria (JNC VII).<sup>18</sup> Normal BP was defined as having SBP < 120 mmHg and DBP < 80 mmHg. Pre-hypertension was defined as having SBP of 120–139 mmHg

1  
2  
3  
4126 and/or DBP of 80–89 mmHg. Grade 1 hypertension was defined as having SBP of 140–159 mmHg  
5  
6  
7127 and/or DBP of 90–99 mmHg. Grade 2 or grade 3 hypertension was defined as SBP  $\geq$ 160 mmHg and/or  
8  
9  
10128 DBP  $\geq$ 100 mmHg.<sup>18</sup> According to the Chinese adult dyslipidemia prevention guide (2007 edition),  
11  
1229 individuals with a fasting TC  $\geq$ 6.22 mmol/L, TG  $\geq$ 2.26 mmol/L, HDL-C $<$ 1.04 mmol/L, and/or  
13  
14  
1530 LDL-C $>$ 4.14 mmol/L, or currently undergoing pharmacologic treatment were defined as the  
16  
17  
1831 dyslipidemia.<sup>19</sup> T2D was defined based on World Health Organization (WHO) 1999 diagnostic criteria  
19  
2032 as fasting plasma glucose  $\geq$ 7.0mmol/l or 2-h plasma glucose  $\geq$ 11.1mmol/l, impaired fasting glucose (IFG)  
21  
22  
2333 was defined as 6.1 mmol/l  $\leq$  FPG  $<$  7.0 mmol/l, and normal condition was defined as FPG  $<$ 6.1 mmol/l.<sup>20</sup>  
24  
25  
2634 The eGFR was calculated using Modification of Diet in Renal Disease (MDRD) formula<sup>21</sup>:  $186 \times [\text{serum}$   
27  
28  
2935 creatinine (mg/ dl)] $^{-1.154} \times (\text{age})^{-0.203} \times [0.742 \text{ (if female)}]$ . According to the Kidney Disease Outcomes  
30  
3136 Quality Initiative (KDOQI) clinical practice guideline, estimated glomerular filtration rate (eGFR)  $<$ 60  
32  
33  
3437 mL/min/1.73 m<sup>2</sup>, proteinuria and hematuria were defined as markers of CKD.<sup>22</sup> Urine proteinuria were  
35  
36  
3738 recorded as negative (-), trace, 1+, 2+ and 3+. Albuminuria was defined as  $\geq$ 1+.

## 41 4240 **Data collection**

43  
44  
4541 The subjects participating in the study attended to the medical center in the morning after overnight  
46  
47  
4842 fasting for at least 12 hours. After 5 minutes resting, sitting blood pressure was measured in right arm by  
49  
5043 a trained medical staff using an electronic blood pressure monitor. The resting BP was measured three  
51  
52  
5344 times with five minutes intervals between them, and then the averages were calculated, which were used  
54  
55  
5645 for further analysis. Blood samples were obtained on their arrival at the medical center and fasting  
57  
5846 glucose (FPG) were measured by the hexokinase method, total cholesterol, low-density  
59  
60



lipoprotein-cholesterol (LDL-C), high-density lipoprotein-cholesterol (HDL-C), triglyceride, blood urea nitrogen (BUN), creatinine, serum uric acid were measured in an automated bio-analyzer (Hitachi, Tokyo, Japan). Midstream urine specimen was collected for urinary analysis by the dipstick method. Urine pH and proteinuria were recorded as categorical data. Laboratory reagents were purchased from Nanjing Jiancheng Bioengineering Institute (Nanjing, China).

After blood and urine sampling, basic characteristics and medical history were collected by medical staff. Anthropometric measurements including height and body weight were obtained according to a standardized protocol. Renal ultrasonography scanning was performed and measured by an experienced radiologist using GE LOGIQ P5 scanner (GE Healthcare, Milwaukee, SUA) who was blinded to the subjects' medical information.

### **Patient and public involvement**

No patient was involved in the design or conduct of the study, but the results of the study will be shared to patients coming for follow-up.

### **Statistical analysis**

We divided the subjects into gender-specific quartiles [males (M): Q1 $\leq$  4.9, Q2: 5.0-5.9, Q3: 6.0-6.9, Q4  $\geq$  7.0 mg/dL; females (F): Q1 $\leq$  3.9, Q2: 4.0-4.9, Q3: 5.0-5.9, Q4  $\geq$  6.0mg/dL] according to serum uric acid level. The continuous variables are reported in means $\pm$ SD and categorical variables are presented in percentages. In case of nonparametric data distribution medians with inter quartile range (IQR) are presented. The univariate analysis of variance (ANOVA) was used to measure the data among the groups or a Kruskal-Wallis test in case of nonparametric data distribution. Differences between groups for

1  
2  
3  
4 169 proportions were tested with a chi-square test. If the results show differences between the groups, the  
5  
6  
7 170 post-hoc tests would be done. As for the post-hoc test, we used least significance difference (LSD) test if  
8  
9  
10 171 the variance was homogeneous, and we used Tamhane's T2 test if not. Correlations were Pearson's or  
11  
12 172 Spearman's depending on the distribution of the data. In the present study, SUA, age, BMI, SBP, DBP,  
13  
14  
15 173 FPG, TC, TG, HDL-C, LDL-C, eGFR were normally distributed. Thus, Pearson's correlation was used  
16  
17  
18 174 among these variables. If Pearson's correlation analysis was statistically significant, multiple linear  
19  
20 175 regression analysis was performed to determine the association of SUA with various independent  
21  
22  
23 176 variables. We analyzed the multiple collinearity by calculating the correlation coefficient matrix,  
24  
25  
26 177 tolerance and variance inflation factor of independent variables. Multivariable logistic regression analysis  
27  
28  
29 178 (unadjusted and full-adjusted) was used to calculate the odds ratio for hyperuricemia according to  
30  
31 179 different status of clinical parameters. Furthermore, multivariable logistic regression analysis (multiple  
32  
33  
34 180 adjusted models) was used to examine the association between related diseases and the SUA categories of  
35  
36  
37 181 Q2 or greater compared to the lowest SUA category. The association between hyperuricemia and  
38  
39  
40 182 clustered CVD risk factors had been calculated. Statistical analyses were performed by IBM SPSS  
41  
42  
43 183 statistics version 20.0 (SPSS, Chicago, IL, USA). Statistical significance was set at *P*-values of <0.05.  
44

## 45 184 RESULTS

### 47 185 Clinical characteristics of participants in quartiles of serum uric acid level.

49  
50 186 A total of 27,176 participants with mean age  $48.88 \pm 15.48$  years, and 15300 (56.3%) men and 11876  
51  
52  
53 187 (43.7%) women completed in the study. The prevalence rates of hyperuricemia of men and women were  
54  
55  
56 188 22.3 % (95% confidence intervals (CI) 21.7–23.0%) and 11.1% (10.6–11.7%), respectively. Female  
57  
58 189 individuals with higher level of SUA were older than the age of males. With increasing quartiles of SUA,  
59  
60

1  
2  
3  
4 190 participants had more CVDs risk factors (obesity, hypertension, dyslipidemia) and renal diseases (chronic  
5  
6  
7 191 kidney disease, nephrolithiasis), as well as elevated levels of body mass index, systolic blood pressure,  
8  
9  
10 192 diastolic blood pressure, total cholesterol, triglyceride, low density lipoprotein cholesterol, creatinine,  
11  
12 193 blood urea nitrogen (BUN), and decreased levels of high density lipoprotein cholesterol, estimated  
13  
14  
15 194 glomerular filtration rate in both men and women (Table 1, all *P* values for trend <0.001).

### 196 **The prevalence of CVD risk factors, renal diseases in quartiles of serum uric acid level**

197 As demonstrated in Figure 1, there was a significant increase in the prevalence of cardiovascular disease  
24  
25  
26 198 risk factors and renal disorders across SUA quartiles in men and women (all *P* value for trend <0.001). In  
27  
28  
29 199 the male hyperuricemia individuals, the prevalence rates of obesity, hypertension, diabetes mellitus,  
30  
31 200 dyslipidemia, chronic kidney disease and nephrolithiasis were 23.8% (95% CI, 22.4-25.3%), 35.7%  
32  
33  
34 201 (34.1-37.3%), 4.9% (4.2-5.6%), 54.3% (52.6-56.0%), 7.0% (6.1-7.8%) and 18.6% (17.3-19.9%)  
35  
36  
37 202 respectively. In the female hyperuricemia individuals, the prevalence rates of obesity, hypertension,  
38  
39  
40 203 diabetes mellitus, dyslipidemia, chronic kidney disease and nephrolithiasis were 23.8% (21.5-26.1%),  
41  
42 204 43.2% (40.6-45.9%), 10.0% (8.4-11.6%), 45.8% (43.1-48.5%), 12.9% (11.1-14.7%) and 16.9%  
43  
44  
45 205 (14.9-19.0%) , respectively.

### 206 207 **The correlation between serum uric acid and various clinical parameters**

208 In the present study, SUA, age, BMI, SBP, DBP, FPG, TC, TG, HDL-C, LDL-C, eGFR were normally  
54  
55  
56 209 distributed. Thus, we used Pearson's correlation analysis to investigate the relationships and the results  
57  
58  
59 210 were shown in Table 2. In men, the level of serum uric acid was positively correlated with BMI, SBP,  
60

1  
2  
3  
4  
5  
6  
7  
8  
9  
10  
11  
12  
13  
14  
15  
16  
17  
18  
19  
20  
21  
22  
23  
24  
25  
26  
27  
28  
29  
30  
31  
32  
33  
34  
35  
36  
37  
38  
39  
40  
41  
42  
43  
44  
45  
46  
47  
48  
49  
50  
51  
52  
53  
54  
55  
56  
57  
58  
59  
60

DBP, TC, TG, LDL-C, and negatively correlated with age, FPG, HDL-C and eGFR (all  $P$  values $<0.001$ ).

In women, the level of serum uric acid was positively correlated with age, BMI, SBP, DBP, FPG, TC, TG, LDL-C, and negatively correlated with HDL-C and eGFR (all  $P$  values $<0.001$ ).

Multiple linear regression analysis in Table 3 showed that adjusting for various factors, serum uric acid was still positively correlated with BMI, SBP, TC, TG, negatively correlated with age, FPG, HDL-C and eGFR in males (all  $P$  values $<0.001$ ). Serum uric acid was positively correlated with BMI, SBP, TC, TG, negatively correlated with FPG, HDL-C and eGFR in females (all  $P$  values $<0.001$ , except FPG  $P$  values=0.002 ).

### **The association between hyperuricemia and the clinical outcome**

Multivariable logistic regression models (unadjusted and full-adjusted) were analyzed and the results were shown in Table 4 with the odds ratio (OR) for hyperuricemia according to different clinical outcome. We found that after adjustment for confounders, increased levels of BMI, BP, triglyceride, LDL-C, albuminuria all are positively related to increased odds ratio of hyperuricemia. Renal insufficiency, acid urine, nephrolithiasis also positively correlated with hyperuricemia, however, FPG and alkaline urine negatively correlated with hyperuricemia in both gender (all  $P$  values $<0.05$ ). These results suggested that the individuals with overweight/obesity, hypertension, dyslipidemia, renal insufficiency, massive albuminuria, acid urine, nephrolithiasis were more susceptible to hyperuricemia in both men and women.

### **The relationship between different levels of serum uric acid and CVDs risk factors, renal disorders**

1  
2  
3  
4231 Multivariable logistic regression analysis (multiple adjusted models) was studied and the results were  
5  
6  
7232 shown in Table 5. The odd ratio for obesity, hypertension, diabetes mellitus, dyslipidemia, chronic kidney  
8  
9  
10233 disease, nephrolithiasis in the highest SUA quartile was 3.115 (95% CI 2.604–3.727,  $P < 0.001$ , model 3),  
11  
1234 1.290 (95% CI 1.136–1.465,  $P < 0.001$ , model 3), 0.205 (95% CI 0.165–0.255,  $P < 0.001$ , model 3), 2.503  
13  
14  
1535 (95% CI 2.226–2.815,  $P < 0.001$ , model 3), 6.962 (95% CI 4.921–9.851,  $P < 0.001$ , model 3), 1.480 (95%  
16  
17  
1836 CI 1.272–1.722,  $P < 0.001$ , model 3) compared with that in the lowest SUA quartile, respectively, in men.

19  
20237 The data in Table 6 were multivariable logistic regression analysis in women and the odd ratio for  
21  
22  
2338 obesity, hypertension, diabetes mellitus, dyslipidemia, chronic kidney disease, nephrolithiasis in the  
24  
25  
2639 highest SUA quartile was 3.755 (95% CI 2.956–4.769,  $P < 0.001$ , model 3), 1.287 (95% CI 1.075–1.539,  
27  
28  
2940  $P = 0.006$ , model 3), 0.514 (95% CI 0.377–0.701,  $P < 0.001$ , model 3), 3.675 (95% CI 3.114–4.336,  $P$   
30  
3141  $< 0.001$ , model 3), 11.508 (95% CI 7.242–18.288,  $P < 0.001$ , model 3), 1.239 (95% CI 1.008–1.522,  $P$   
32  
33  
3442  $= 0.042$ , model 3) compared with that in the lowest SUA quartile, respectively.

35  
36  
3743 From multivariable logistic regression analysis in men and women we concluded that hyperuricemia  
38  
39  
4044 positively correlated with obesity, hypertension, dyslipidemia, chronic kidney disease, nephrolithiasis, but  
41  
4245 negatively correlated with diabetes mellitus (all  $P < 0.05$ ) in both gender. Furthermore, females had  
43  
44  
4546 stronger association between hyperuricemia and chronic kidney disease than males.

#### 46 47 48 49 5048 **The association between hyperuricemia and clustered CVD risk factors.**

51  
52  
5349 Multivariable logistic regression was analyzed for hyperuricemia and clustered CVD risk factors, the  
54  
55  
5650 results were shown in Table 7. After adjustment for age, compared with the group of zero CVD risk  
57  
58  
5951 factor reference group, the odd ratio for group of  $\geq 3$  CVD risk factors was 3.804 (95% CI 3.252–4.450,  $P$   
60

1  
2  
3  
4 252 <0.001), 6.265 (95% CI 4.945–7.938,  $P < 0.001$ ) in men and women, respectively. The individuals with  
5  
6  
7 253 more CVD risk factors were associated with the higher ORs of hyperuricemia both in men and women ( $P$   
8  
9 254 for trend <0.001). Furthermore, females had a stronger association of hyperuricemia with clustered CVD  
10  
11  
12 255 risk factors than males.  
13  
14  
15 256

## 17 257 **DISCUSSION**

19  
20 258 In the present study, we found that increasing prevalence of CVD risk factors and renal disorders was  
21  
22  
23 259 predominantly associated with increased SUA levels in Shanghai population. According to our  
24  
25  
26 260 multi-center epidemiologic study of 27176 subjects, the prevalence of hyperuricemia in Shanghai was  
27  
28  
29 261 17.4% (95%CI 17.0%-17.9%), 22.3% (21.7–23.0%) in men and 11.1% (10.6–11.7%) in women. This is  
30  
31 262 higher than the prevalence of hyperuricemia among nationwide Chinese adults between year 2009 and  
32  
33  
34 263 2010 (8.4%),<sup>23</sup> and close to the developed countries, such as United States (21.4 %) and Japan (25.8 %).  
35  
36  
37 264 <sup>24 25</sup> Along with the rapid economic development of Shanghai, the consumption of purine-rich food and  
38  
39  
40 265 alcohol is increasing. Meanwhile, obesity and aging population is rising. The change of lifestyle, dietary  
41  
42 266 habit and population attributed to this phenomenon. The gender-related differences between serum uric  
43  
44  
45 267 acid level and age could be resulted from sex hormones. Estrogen promoted urinary uric acid excretion.<sup>26</sup>  
46

47  
48 268 Obesity is probably the major risk factor for CVD. Obesity accompanied by increased waist  
49  
50 269 circumference, hyperinsulinemia and dyslipidemia. The most frequent manifestation of glucose  
51  
52  
53 270 metabolism in obese population is hyperinsulinemia, a compensatory mechanism, whereas fasting  
54  
55  
56 271 glucose remains normal.<sup>27</sup> It is likely that the presence of insulin resistance and hyperinsulinemia  
57  
58 272 facilitates renal tubular cells to reabsorb sodium coupling with urate.<sup>28</sup> This may be the reason why  
59  
60

1  
2  
3  
4273 obesity is accompanied by hyperuricemia. And our data are also in agreement with the result from two  
5  
6  
7274 retrospective studies in youths.<sup>29 30</sup>  
8

9  
10 Hypertension is another important risk factor for CVD. Recently, Borghi C et al. found that SUA  
11  
1276 levels were significantly higher in untreated and poorly controlled hypertensive patients in comparison to  
13  
14  
1577 normotensive controls and well-controlled hypertensive patients.<sup>31-33</sup> Our data were in accordance with  
16  
17  
1878 Borghi C's results. After adjustment of confounding factors, hypertension was still significantly  
19  
20  
2179 associated with hyperuricemia. The odd ratio for hypertension in the highest SUA quartile was 1.290  
21  
22  
2380 (95% CI 1.136–1.465,  $P < 0.001$ ) in men, 1.287 (95% CI 1.075–1.539,  $P < 0.001$ ) in women. Future  
24  
25  
2681 follow-up studies and randomized clinical trials are required for investigating the causative relationships  
27  
28  
2982 between urate and blood pressure. However, animal studies had showed that high level of uric acid  
30  
3183 caused high blood pressure, which was mediated by activation of renal and systemic  
32  
33  
3484 renin-angiotensin-aldosterone systems (RAAS), oxidative stress, vascular insulin resistance and loss of  
35  
36  
3785 endothelial nitric oxide.<sup>34 35</sup>  
38

39  
40 One of the interesting findings in our investigation was that the higher level of SUA was positively  
41  
4287 correlated with the higher prevalence rates of diabetes mellitus in women, but inversely correlated with  
43  
44  
4588 that in men (Figure 1). The Pearson's correlation analysis demonstrated that the level of SUA positively  
46  
47  
4889 correlated with fasting plasma glucose in women, but negatively in men. However, the coefficients of  
49  
5090 determination of the models were low. The obtained  $P$  values below 0.001 may attributed to the effect of  
51  
52  
5391 the big sample size. So we further adopted multiple linear regression and multivariable logistic regression  
54  
55  
5692 analysis for association of various variable with serum uric acid. After adjustment of confounding factors,  
57  
5893 results of multivariable logistic regression showed that inverse association of serum uric acid with  
59  
60

1  
2  
3  
4 294 diabetes mellitus in both men and women. The odd ratio for diabetes mellitus in the highest SUA quartile  
5  
6  
7 295 was 0.205 (95% CI 0.165–0.255,  $P < 0.001$ ) in men, 0.514 (95% CI 0.377–0.701,  $P < 0.001$ ) in women.  
8  
9  
10 296 This also confirmed by multiple linear regression analysis. We speculated that this phenomenon is  
11  
12 297 probably due to the presence of high level of blood glucose which promotes renal excretion of serum uric  
13  
14  
15 298 acid. It has been indicated that hyperglycaemia worsens the function of beta cells and deteriorates  
16  
17  
18 299 glycemic control, which gradually elevates the rate of renal glomerular filtration.<sup>36</sup> The hyperfiltration  
19  
20 300 due to multiple kidney disorders will lead to increased excretion of uric acid, and will be more susceptible  
21  
22  
23 301 to diabetic nephropathy with decreasing eGFR.<sup>37</sup>  
24  
25

26 302 Based on our data, hyperuricemia had a remarkable association with cardiovascular disease risk  
27  
28  
29 303 factors and renal disorders. The more CVD risk factors individuals had, the higher ORs of hyperuricemia  
30  
31 304 were observed in both genders, especially in women. This was consistent with Borghi C's studies that  
32  
33  
34 305 SUA were associated with cardiovascular risk score, and the results supported an independent association  
35  
36  
37 306 between SUA and cardiovascular disease.<sup>3 38</sup> There were numerous mechanisms involved in the close  
38  
39  
40 307 association between serum uric acid and CVDs.<sup>39-42</sup> Uric acid stimulates platelet-derived growth factor  
41  
42 308 receptor $\beta$  (PDGFR $\beta$ ) phosphorylation, leading to vascular smooth muscle cell (VSMC) proliferation.<sup>39</sup>  
43  
44  
45 309 Uric acid increases oxidative stress and stimulates the activation of renin-angiotensin system, resulting in  
46  
47  
48 310 the senescence and apoptosis of human umbilical vein endothelial cells (HUVECs).<sup>40</sup> Uric acid also can  
49  
50  
51 311 cause mitochondrial alterations and decreased intracellular ATP production and subsequently result in  
52  
53 312 endothelial dysfunction in human aortic endothelial cells (HAECs).<sup>41</sup> A large quantity of animal  
54  
55  
56 313 experiments and human epidemiological documents indicated that SUA-lowering treatment was beneficial  
57  
58  
59 314 for cardiovascular diseases.<sup>43-47</sup>  
60



1  
2  
3  
4315 On the other hand, the related mechanisms in the link between hyperuricemia and chronic kidney  
5  
6  
7316 disease (CKD) were not well investigated. It was demonstrated that 70% of urate eliminated occurs in the  
8  
9  
317 kidneys, and decreased eGFR would result in elevated levels of SUA.<sup>48</sup> However, uric acid could induce  
10  
11  
318 oxidative stress, trigger activation of RAAS and inflammation, cause endothelial dysfunction, and thus  
12  
13  
14  
1319 subsequently lead to decline of eGFR.<sup>35 49 50</sup> The persistent high level of SUA predicts the high risk of  
16  
17  
1820 developing CKD.<sup>51</sup> There was a marked association of SUA with albuminuria in patients with renal  
19  
20  
321 insufficiency.<sup>52</sup> Our study were in consistent with many prospective studies,<sup>14 53 54</sup> showing that SUA is a  
21  
22  
2322 significant risk factor for CKD and proteinuria, which is independent of confounders of CRFs. We further  
24  
25  
2623 demonstrated that hyperuricemia significantly correlated with acid urine and nephrolithiasis, which was  
27  
28  
324 confirmed by the prevalence rates of chronic kidney disease and nephrolithiasis across the SUA levels.  
29  
30

3125 This study has some limitations that need to be mentioned. First, it was a cross-section study and the  
32  
33  
3326 results could not establish causative relationships between hyperuricemia and CRFs clustering and renal  
35  
36  
3727 diseases. Future follow-up studies are required for more accurate evaluation of these relationships.  
38  
39  
328 Second, the data were from three medical centers' databases that lacked details in waist circumference,  
40  
41  
4229 HOMA-IR, smoking, drinking, lifestyles, diet and pharmacotherapy, which might affect the deviations of  
43  
44  
4530 some clinical outcomes. Nonetheless, the strengths of our study included its strict exclusion criteria based  
46  
47  
331 on medical histories and laboratory findings. And we conducted a multi-center study with large sample  
48  
49  
5032 size which ensured sufficient parameters and accurate results. The relationship was analyzed in both  
51  
52  
5333 sexes and a solid conclusion about the differences between men and women was gained.  
54  
55

## 334 56 57 58335 **CONCLUSION** 59 60

1  
2  
3  
4  
5  
6  
7  
8  
9  
10  
11  
12  
13  
14  
15  
16  
17  
18  
19  
20  
21  
22  
23  
24  
25  
26  
27  
28  
29  
30  
31  
32  
33  
34  
35  
36  
37  
38  
39  
40  
41  
42  
43  
44  
45  
46  
47  
48  
49  
50  
51  
52  
53  
54  
55  
56  
57  
58  
59  
60

In summary, our data demonstrated that the increasing prevalent rate of CRFs and renal disorders were significantly correlated with the elevated level of serum uric acid. Hyperuricemia was remarkably linked with CVD-related risk factors and kidney disease, especially in females.

**Acknowledgements** The authors appreciate all the participants and their families. They also thank the members of the study team from Shanghai East Hospital Affiliated to Tongji University School of Medicine, Pudong New District Gongli Hospital and Baoshan Branch of Shanghai First People's Hospital for their assistance in completing this project.

**Author Contributions** M.T., N.L., S.Z., Y.S. and Y.Z. performed the statistical analysis and wrote the manuscript; M.T., X.M., X.P., Y.C., H.G. and Y.S. participated in the data collection; M.T., N.L., S.Z. and Y.Z. contributed to discussion; M.T., and N.L. participated in the design of the study and edited the manuscript. All authors have read and approved the final manuscript. The corresponding author had full access to all the data in the study and had final responsibility for the decision to submit for publication.

## **Funding**

This study was also supported by the National Nature Science Foundation of China grants (81670690, 81470991 and 81200492 to N.L., 81830021, 81670623, 81470920 and 81270778 to S.Z.), the Key Discipline Construction Project of Pudong Health Bureau of Shanghai (PWZxk2017-05 to N.L.), the Branch grant of National key grants of Ministry of Science and Technology (2018YFA0108802 to S.Z.), US National Institutes of Health (2R01DK08506505A1 to S.Z.), the Shanghai Scientific Committee of China (13PJ1406900 to N.L.), Shanghai Health Bureau grant (20134464 to X.P.).

**Competing interests** None declared.

1  
2  
3  
4359 **Patient consent** Obtained.  
5

6  
7360 **Ethics approval and consent to participate**  
8

9  
10361 This study was approved by the Human Research Ethics Committee of Shanghai East Hospital Affiliated  
11  
12362 to Tongji University School of Medicine, the Human Research Ethics Committee of Pudong New District  
13  
14  
15363 Gongli Hospital and the Human Research Ethics Committee of Baoshan Branch of Shanghai First  
16  
17  
18364 People's Hospital. All methods were performed in compliance with Good Clinical Practice (GCP)  
19  
20365 guidelines and the Declaration of Helsinki. Written informed consent was obtained from each participant  
21  
22  
23366 before data collection.  
24

25  
26367 **Provenance and peer review** Not commissioned; externally peer reviewed.  
27

28  
29368 **Data sharing statement** The data sets generated and analysed during the current study are available  
30  
31369 from the corresponding author upon reasonable request.  
32

33  
34370 **Open Access** This is an Open Access article distributed in accordance with the Creative Commons  
35  
36371 Attribution Non Commercial (CC BY-NC 4.0) license, which permits others to distribute, remix, adapt,  
37  
38  
39372 build upon this work non-commercially, and license their derivative works on different terms, provided  
40  
41  
42373 the original work is properly cited and the use is non-commercial.  
43

44  
45374 See: <http://creativecommons.org/licenses/by-nc/4.0/>  
46

47  
48375 © Article author(s) (or their employer(s) unless otherwise stated in the text of the article) 2018. All rights  
49  
50376 reserved. No commercial use is permitted unless otherwise expressly granted.  
51

52  
53377  
54  
55378 **REFERENCES**  
56

57379 1. Jalal DI. Hyperuricemia, the kidneys, and the spectrum of associated diseases: a narrative review. *Curr*  
58  
59380 *Med Res Opin* 2016;32:1863-69.  
60

- 1  
2  
3  
4381 2. Kanbay M, Jensen T, Solak Y, et al. Uric acid in metabolic syndrome: From an innocent bystander to a  
5  
6382 central player. *Eur J Intern Med* 2016;29:3-8.
- 7  
8383 3. Borghi C, Rosei EA, Bardin T, et al. Serum uric acid and the risk of cardiovascular and renal disease. *J*  
9  
1084 *Hypertens* 2015;33:1729-41.
- 11  
1285 4. Kuwabara M, Bjornstad P, Hisatome I, et al. Elevated Serum Uric Acid Level Predicts Rapid Decline  
13  
1486 in Kidney Function. *Am J Nephrol* 2017;45:330-37.
- 15  
1687 5. Gertler MM, Garn SM, Levine SA. Serum uric acid in relation to age and physique in health and in  
17  
1888 coronary heart disease. *Ann Intern Med* 1951;34:1421-31.
- 19  
2089 6. Wang TT, Lin B, Cui WX, et al. Clustering of Cardiovascular Risk Factors and Diabetes: A  
21  
2290 Prospective Cohort Study on the Inner Mongolian Population in China. *Biomed Environ Sci*  
23  
2491 2018;31:749-56.
- 25  
2692 7. de Souza Filho ZA, Ferreira AA, Dos Santos J, et al. Cardiovascular risk factors with an emphasis on  
27  
2893 hypertension in the Mura Indians from Amazonia. *BMC Public Health* 2018;18:1251.
- 29  
3094 8. Matthews KA, Jennings JR, Lee L, et al. Depressive symptoms during childhood and cardiovascular  
31  
3295 risk factors in black and white men. *Psychosom Med* 2018.
- 33  
3496 9. van Sloten TT, Tafflet M, Perier MC, et al. Association of Change in Cardiovascular Risk Factors With  
35  
3697 Incident Cardiovascular Events. *Jama* 2018;320:1793-804.
- 37  
3898 10. Lipkowitz MS. Regulation of uric acid excretion by the kidney. *Curr Rheumatol Rep* 2012;14:179-88.
- 39  
4099 11. DiBianco JM, Jarrett TW, Mufarrij P. Metabolic Syndrome and Nephrolithiasis Risk: Should the  
41  
42400 Medical Management of Nephrolithiasis Include the Treatment of Metabolic Syndrome? *Rev Urol*  
43  
44401 2015;17:117-28.
- 45  
46402 12. Jalal DI, Rivard CJ, Johnson RJ, et al. Serum uric acid levels predict the development of albuminuria  
47  
48403 over 6 years in patients with type 1 diabetes: findings from the Coronary Artery Calcification in Type  
49  
50404 1 Diabetes study. *Nephrol Dial Transplant* 2010;25:1865-9.
- 51  
52405 13. Klisic A, Kocic G, Kavaric N, et al. Xanthine oxidase and uric acid as independent predictors of  
53  
54406 albuminuria in patients with diabetes mellitus type 2. *Clin Exp Med* 2018;18:283-90.
- 55  
56407 14. Bellomo G, Venanzi S, Verdura C, et al. Association of uric acid with change in kidney function in  
57  
58408 healthy normotensive individuals. *Am J Kidney Dis* 2010;56:264-72.
- 59  
60

- 1  
2  
3  
4 409 15. Mwasongwe SE, Fulop T, Katz R, et al. Relation of uric acid level to rapid kidney function decline  
5  
6 410 and development of kidney disease: The Jackson Heart Study. *J Clin Hypertens (Greenwich)*  
7  
8 411 2018;20:775-83.
- 9  
10 412 16. Becker MA, Schumacher HR, Jr., Wortmann RL, et al. Febuxostat compared with allopurinol in  
11  
12 413 patients with hyperuricemia and gout. *N Engl J Med* 2005;353:2450-61.
- 13  
14 414 17. Appropriate body-mass index for Asian populations and its implications for policy and intervention  
15  
16 415 strategies. *Lancet* 2004;363:157-63.
- 17  
18 416 18. National High Blood Pressure Education P. The Seventh Report of the Joint National Committee on  
19  
20 417 Prevention, Detection, Evaluation, and Treatment of High Blood Pressure. Bethesda (MD): National  
21  
22 418 Heart, Lung, and Blood Institute (US), 2004.
- 23  
24 419 19. [Chinese guidelines on prevention and treatment of dyslipidemia in adults]. *Zhonghua Xin Xue Guan*  
25  
26 420 *Bing Za Zhi* 2007;35:390-419.
- 27  
28 421 20. Alberti KG, Zimmet PZ. Definition, diagnosis and classification of diabetes mellitus and its  
29  
30 422 complications. Part 1: diagnosis and classification of diabetes mellitus provisional report of a WHO  
31  
32 423 consultation. *Diabet Med* 1998;15:539-53.
- 33  
34 424 21. Levey AS, Bosch JP, Lewis JB, et al. A more accurate method to estimate glomerular filtration rate  
35  
36 425 from serum creatinine: a new prediction equation. Modification of Diet in Renal Disease Study Group.  
37  
38 426 *Ann Intern Med* 1999;130:461-70.
- 39  
40 427 22. K/DOQI clinical practice guidelines for chronic kidney disease: evaluation, classification, and  
41  
42 428 stratification. *Am J Kidney Dis* 2002;39:S1-266.
- 43  
44 429 23. Liu H, Zhang XM, Wang YL, et al. Prevalence of hyperuricemia among Chinese adults: a national  
45  
46 430 cross-sectional survey using multistage, stratified sampling. *J Nephrol* 2014;27:653-8.
- 47  
48 431 24. Zhu Y, Pandya BJ, Choi HK. Prevalence of gout and hyperuricemia in the US general population: the  
49  
50 432 National Health and Nutrition Examination Survey 2007-2008. *Arthritis Rheum* 2011;63:3136-41.
- 51  
52 433 25. Nagahama K, Iseki K, Inoue T, et al. Hyperuricemia and cardiovascular risk factor clustering in a  
53  
54 434 screened cohort in Okinawa, Japan. *Hypertens Res* 2004;27:227-33.
- 55  
56 435 26. Sekine T, Miyazaki H, Endou H. Molecular physiology of renal organic anion transporters. *Am J*  
57  
58 436 *Physiol Renal Physiol* 2006;290:F251-61.

- 1  
2  
3  
437 27. Yoo TW, Sung KC, Shin HS, et al. Relationship between serum uric acid concentration and insulin  
5  
6438 resistance and metabolic syndrome. *Circ J* 2005;69:928-33.  
7  
8439 28. Bjornstad P, Lanaspa MA, Ishimoto T, et al. Fructose and uric acid in diabetic nephropathy.  
9  
1040 *Diabetologia* 2015;58:1993-2002.  
11  
1241 29. Lurbe E, Torro MI, Alvarez-Pitti J, et al. Uric acid is linked to cardiometabolic risk factors in  
13  
1442 overweight and obese youths. *J Hypertens* 2018;36:1840-46.  
15  
1643 30. Ishiro M, Takaya R, Mori Y, et al. Association of uric acid with obesity and endothelial dysfunction  
17  
1844 in children and early adolescents. *Ann Nutr Metab* 2013;62:169-76.  
19  
2045 31. Cicero AF, Rosticci M, Fogacci F, et al. High serum uric acid is associated to poorly controlled blood  
21  
2246 pressure and higher arterial stiffness in hypertensive subjects. *Eur J Intern Med* 2017;37:38-42.  
23  
2447 32. Mancia G, Grassi G, Borghi C. Hyperuricemia, urate deposition and the association with hypertension.  
25  
2648 *Curr Med Res Opin* 2015;31 Suppl 2:15-9.  
27  
2849 33. Cicero AF, Salvi P, D'Addato S, et al. Association between serum uric acid, hypertension, vascular  
29  
3050 stiffness and subclinical atherosclerosis: data from the Brisighella Heart Study. *J Hypertens*  
31  
3251 2014;32:57-64.  
33  
3452 34. Choi YJ, Yoon Y, Lee KY, et al. Uric acid induces endothelial dysfunction by vascular insulin  
35  
3653 resistance associated with the impairment of nitric oxide synthesis. *Faseb j* 2014;28:3197-204.  
37  
3854 35. Corry DB, Eslami P, Yamamoto K, et al. Uric acid stimulates vascular smooth muscle cell  
39  
4055 proliferation and oxidative stress via the vascular renin-angiotensin system. *J Hypertens*  
41  
4256 2008;26:269-75.  
43  
4457 36. Li Q, Yang Z, Lu B, et al. Serum uric acid level and its association with metabolic syndrome and  
45  
4658 carotid atherosclerosis in patients with type 2 diabetes. *Cardiovasc Diabetol* 2011;10:72.  
47  
4859 37. Lytvyn Y, Skrtic M, Yang GK, et al. Glycosuria-mediated urinary uric acid excretion in patients with  
49  
5060 uncomplicated type 1 diabetes mellitus. *Am J Physiol Renal Physiol* 2015;308:F77-83.  
51  
5261 38. Borghi C, Rodriguez-Artalejo F, De Backer G, et al. Serum uric acid levels are associated with  
53  
5462 cardiovascular risk score: A post hoc analysis of the EURIKA study. *Int J Cardiol* 2018;253:167-73.  
55  
56  
57  
58  
59  
60

- 1  
2  
3  
463 39. Kirca M, Oguz N, Cetin A, et al. Uric acid stimulates proliferative pathways in vascular smooth  
5  
6464 muscle cells through the activation of p38 MAPK, p44/42 MAPK and PDGFRbeta. *J Recept Signal*  
7  
8465 *Transduct Res* 2017;37:167-73.
- 9  
1066 40. Yu MA, Sanchez-Lozada LG, Johnson RJ, et al. Oxidative stress with an activation of the  
11  
1267 renin-angiotensin system in human vascular endothelial cells as a novel mechanism of uric  
13  
1468 acid-induced endothelial dysfunction. *J Hypertens* 2010;28:1234-42.
- 15  
1469 41. Sanchez-Lozada LG, Lanaspá MA, Cristobal-Garcia M, et al. Uric acid-induced endothelial  
17  
1470 dysfunction is associated with mitochondrial alterations and decreased intracellular ATP  
19  
2071 concentrations. *Nephron Exp Nephrol* 2012;121:e71-8.
- 21  
2272 42. Strazzullo P, Puig JG. Uric acid and oxidative stress: relative impact on cardiovascular risk? *Nutr*  
23  
2473 *Metab Cardiovasc Dis* 2007;17:409-14.
- 25  
2674 43. Kondo M, Imanishi M, Fukushima K, et al. Xanthine Oxidase Inhibition by Febuxostat in  
27  
2875 Macrophages Suppresses Angiotensin II-induced Aortic Fibrosis. *Am J Hypertens* 2018.
- 29  
3076 44. Namai-Takahashi A, Sakuyama A, Nakamura T, et al. Xanthine oxidase inhibitor, febuxostat  
31  
3277 ameliorates the high salt intake-induced cardiac hypertrophy and fibrosis in Dahl salt-sensitive rats.  
33  
3478 *Am J Hypertens* 2018.
- 35  
3679 45. MacIsaac RL, Salatzki J, Higgins P, et al. Allopurinol and Cardiovascular Outcomes in Adults With  
37  
3880 Hypertension. *Hypertension* 2016;67:535-40.
- 39  
4081 46. Tani S, Nagao K, Hirayama A. Effect of Febuxostat, a Xanthine Oxidase Inhibitor, on Cardiovascular  
41  
4282 Risk in Hyperuricemic Patients with Hypertension: A Prospective, Open-label, Pilot Study. *Clin Drug*  
43  
4483 *Investig* 2015;35:823-31.
- 45  
4684 47. Xin W, Mi S, Lin Z. Allopurinol therapy improves vascular endothelial function in subjects at risk for  
47  
4885 cardiovascular diseases: a meta-analysis of randomized controlled trials. *Cardiovasc Ther*  
49  
5086 2016;34:441-49.
- 51  
5287 48. Marangella M. Uric acid elimination in the urine. Pathophysiological implications. *Contrib Nephrol*  
53  
5488 2005;147:132-48.
- 55  
5689 49. Bao J, Shi Y, Tao M, et al. Pharmacological inhibition of autophagy by 3-MA attenuates  
57  
5890 hyperuricemic nephropathy. *Clin Sci (Lond)* 2018;132:2299-322.
- 59  
60



- 1  
2  
3  
491 50. Maruhashi T, Hisatome I, Kihara Y, et al. Hyperuricemia and endothelial function: From molecular  
5  
6492 background to clinical perspectives. *Atherosclerosis* 2018;278:226-31.  
7  
8493 51. Chou YC, Kuan JC, Yang T, et al. Elevated uric acid level as a significant predictor of chronic kidney  
9  
10494 disease: a cohort study with repeated measurements. *J Nephrol* 2015;28:457-62.  
11  
12495 52. De Cosmo S, Viazzi F, Pacilli A, et al. Serum Uric Acid and Risk of CKD in Type 2 Diabetes. *Clin J*  
13  
1496 *Am Soc Nephrol* 2015;10:1921-9.  
15  
16497 53. Takae K, Nagata M, Hata J, et al. Serum Uric Acid as a Risk Factor for Chronic Kidney Disease in a  
17  
18498 Japanese Community- The Hisayama Study. *Circ J* 2016;80:1857-62.  
19  
20499 54. Li L, Yang C, Zhao Y, et al. Is hyperuricemia an independent risk factor for new-onset chronic kidney  
21  
2200 disease?: A systematic review and meta-analysis based on observational cohort studies. *BMC Nephrol*  
23  
2401 2014;15:122.  
25  
2602  
27  
2803  
29  
3004  
31  
3205  
33  
3406  
35  
3607  
37  
3808  
39  
4009  
41  
4210  
43  
4411  
45  
4612  
47  
4813  
49  
5014  
51  
5215  
53  
5416  
55  
5617  
57  
5818  
59  
60



**Figure legend**

Figure 1. Prevalence of major CVD risk factors, renal diseases in different levels of serum uric acid.

Prevalence of obesity(A), hypertension(B), diabetes mellitus(C), dyslipidemia(D), chronic kidney disease

(E) and nephrolithiasis(F) in different levels of serum uric acid. The gender-specific quartiles of uric acid

(mg/dL), Q1: males (M)  $\leq 4.9$ , females (F)  $\leq 3.9$ ; Q2: M 5.0-5.9, F 4.0-4.9; Q3: M 6.0-6.9, F 5.0-5.9; Q4:

M $\geq 7.0$ , F $\geq 6.0$ .

For peer review only

**Table 1.** Clinical characteristics of participants in quartiles of serum uric acid level.

|                                     | Men (n=15300)   |                    |                    |                 |                      | Women (n=11876) |                    |                    |                 |                      |
|-------------------------------------|-----------------|--------------------|--------------------|-----------------|----------------------|-----------------|--------------------|--------------------|-----------------|----------------------|
|                                     | Q1<br>≤4.9mg/dl | Q2<br>5.0-5.9mg/dl | Q3<br>6.0-6.9mg/dl | Q4<br>≥7.0mg/dl | P-value<br>for trend | Q1<br>≤3.9mg/dl | Q2<br>4.0-4.9mg/dl | Q3<br>5.0-5.9mg/dl | Q4<br>≥6.0mg/dl | P-value<br>for trend |
| N(%)                                | 2929(19.1%)     | 4720(30.8%)        | 4236(27.7%)        | 3415(22.3%)     | -                    | 3355(28.3%)     | 4553(38.3%)        | 2645(22.3%)        | 1323(11.1%)     | -                    |
| Comorbidities                       |                 |                    |                    |                 |                      |                 |                    |                    |                 |                      |
| Obesity (n, %)                      | 194(6.6%)       | 450(9.5%)***       | 620(14.6%)***      | 814(23.8%)***   | < 0.001              | 133(4.0%)       | 364(8.0%)***       | 380(14.4%)***      | 315(23.8%)***   | < 0.001              |
| Hypertension (n, %)                 | 809(27.6%)      | 1215(25.7%)        | 1289(30.4%)*       | 1220(35.7%)***  | < 0.001              | 554(16.5%)      | 1013(22.2%)***     | 785(29.7%)***      | 572(43.2%)***   | < 0.001              |
| Diabetes mellitus (n, %)            | 351(12.0%)      | 306(6.5%)***       | 224(5.3%)***       | 168(4.9%)***    | < 0.001              | 125(3.7%)       | 170(3.7%)          | 154(5.8%)***       | 132(10.0%)***   | < 0.001              |
| Dyslipidemia (n, %)                 | 735(25.1%)      | 1567(33.2%)***     | 1732(40.9%)***     | 1854(54.3%)***  | < 0.001              | 394(11.7%)      | 866(19.0%)***      | 782(29.6%)***      | 606(45.8%)***   | < 0.001              |
| Chronic kidney disease (n, %)       | 48(1.6%)        | 114(2.4%)*         | 138(3.3%)***       | 238(7.0%)***    | < 0.001              | 25(0.7%)        | 78(1.7%)***        | 105(4.0%)***       | 171(12.9%)***   | < 0.001              |
| Nephrolithiasis (n, %)              | 384(13.1%)      | 717(15.2%)*        | 653(15.4%)*        | 634(18.6%)***   | < 0.001              | 368(11.0%)      | 484(10.6%)         | 372(14.1%)***      | 224(16.9%)***   | < 0.001              |
| Biochemical variables               |                 |                    |                    |                 |                      |                 |                    |                    |                 |                      |
| Age                                 | 50.08±15.49     | 48.00±15.57***     | 47.24±15.62***     | 47.31±15.76***  | < 0.001              | 46.78±14.02     | 48.79±14.88***     | 52.14±15.44***     | 57.79±15.34***  | < 0.001              |
| BMI (kg/m <sup>2</sup> )            | 23.29±3.06      | 24.11±3.07***      | 24.81±3.14***      | 25.96±3.25***   | < 0.001              | 22.14±3.00      | 23.10±3.31***      | 24.32±3.53***      | 25.66±3.93***   | < 0.001              |
| SBP (mmHg)                          | 126.61±18.21    | 126.22±17.42       | 127.70±18.10*      | 130.24±18.18*** | < 0.001              | 120.26±18.26    | 123.37±19.28***    | 128.36±20.48***    | 135.02±21.25*** | < 0.001              |
| DBP (mmHg)                          | 78.98±11.54     | 78.74±11.09        | 80.16±11.82***     | 81.71±11.85***  | < 0.001              | 73.23±10.52     | 74.98±10.99***     | 77.16±11.25***     | 79.02±11.87***  | < 0.001              |
| FPG (mmol/L)                        | 5.65±1.87       | 5.36±1.35***       | 5.33±1.21***       | 5.33±1.07***    | < 0.001              | 5.08±1.22       | 5.12±1.12          | 5.29±1.22***       | 5.57±1.28***    | < 0.001              |
| TC (mmol/L)                         | 4.52±0.88       | 4.58±0.86**        | 4.71±0.89***       | 4.87±0.91***    | < 0.001              | 4.64±0.91       | 4.82±0.93***       | 5.00±0.94***       | 5.17±1.04***    | < 0.001              |
| TG (mmol/L)                         | 1.28±1.27       | 1.45±1.14***       | 1.72±1.46***       | 2.14±1.71***    | < 0.001              | 0.96±0.59       | 1.19±0.76***       | 1.46±0.98***       | 1.97±1.61***    | < 0.001              |
| HDL-C (mmol/L)                      | 1.32±0.31       | 1.25±0.28***       | 1.22±0.28***       | 1.17±0.26***    | < 0.001              | 1.59±0.35       | 1.50±0.34***       | 1.42±0.32***       | 1.31±0.31***    | < 0.001              |
| LDL-C (mmol/L)                      | 2.77±0.76       | 2.88±0.76***       | 2.95±0.77***       | 3.04±0.81***    | < 0.001              | 2.71±0.77       | 2.89±0.79***       | 3.07±0.81***       | 3.11±0.86***    | < 0.001              |
| eGFR (ml/(min*1.73m <sup>2</sup> )) | 92.46±20.66     | 89.41±19.32***     | 87.74±19.50***     | 84.85±20.04***  | < 0.001              | 100.14±23.03    | 97.08±23.89***     | 93.16±23.98***     | 85.54±25.15***  | < 0.001              |
| Cr (umol / L)                       | 80.90±18.37     | 83.61±14.59***     | 85.39±14.70***     | 88.94±22.63***  | < 0.001              | 62.18±10.80     | 63.83±12.03***     | 65.68±13.25***     | 71.34±28.69***  | < 0.001              |
| BUN (mmol/L)                        | 5.19±1.31       | 5.26±1.22*         | 5.31±1.25***       | 5.43±1.56***    | < 0.001              | 4.57±1.20       | 4.84±1.23***       | 5.11±1.27***       | 5.55±1.82***    | < 0.001              |

The continuous variables are reported in means±SD and categorical variables are presented in percentages. In case of nonparametric data distribution medians with inter quartile range (IQR) are presented. Abbreviations: BMI: body mass index, SBP: systolic blood pressure, DBP: diastolic blood pressure, FPG: fasting plasma glucose, TC: total cholesterol, TG: triglyceride, HDL-C: high density lipoprotein cholesterol, LDL-C: low density lipoprotein cholesterol, eGFR: estimated glomerular filtration rate. Cr: creatinine, BUN: blood urea nitrogen. \*P < 0.05, \*\*P < 0.01, \*\*\*P < 0.001 vs. the group of Q1. Using the least significance difference (LSD) method if the variance is equal or the Tamhane's T2 method if the variance is not equal, using Kruskal-Wallis test in case of nonparametric data distribution.

**Table 2.** Correlation coefficients between serum uric acid and various parameters.

| Variable                            | Men    |         | Women  |         | Total  |         |
|-------------------------------------|--------|---------|--------|---------|--------|---------|
|                                     | r      | P-value | r      | P-value | r      | P-value |
| Age                                 | -0.059 | < 0.001 | 0.227  | < 0.001 | 0.014  | 0.020   |
| BMI (kg/m <sup>2</sup> )            | 0.289  | < 0.001 | 0.327  | < 0.001 | 0.343  | < 0.001 |
| SBP (mmHg)                          | 0.075  | < 0.001 | 0.234  | < 0.001 | 0.158  | < 0.001 |
| DBP (mmHg)                          | 0.091  | < 0.001 | 0.166  | < 0.001 | 0.197  | < 0.001 |
| FPG (mmol/L)                        | -0.072 | < 0.001 | 0.124  | < 0.001 | 0.039  | < 0.001 |
| TC (mmol/L)                         | 0.148  | < 0.001 | 0.185  | < 0.001 | 0.091  | < 0.001 |
| TG (mmol/L)                         | 0.221  | < 0.001 | 0.326  | < 0.001 | 0.290  | < 0.001 |
| HDL-C (mmol/L)                      | -0.177 | < 0.001 | -0.263 | < 0.001 | -0.357 | < 0.001 |
| LDL-C (mmol/L)                      | 0.120  | < 0.001 | 0.181  | < 0.001 | 0.127  | < 0.001 |
| eGFR (ml/(min*1.73m <sup>2</sup> )) | -0.140 | < 0.001 | -0.194 | < 0.001 | -0.219 | < 0.001 |

Abbreviations: BMI: body mass index, SBP: systolic blood pressure, DBP: diastolic blood pressure, FPG: fasting plasma glucose, TC: total cholesterol, TG: triglyceride, HDL-C: high density lipoprotein cholesterol, LDL-C: low density lipoprotein cholesterol, eGFR: estimated glomerular filtration rate.

**Table 3.** Multiple linear regression analysis for association of various independent variable with serum uric acid (dependent variable)

| Variable                            | Men         |                 | Women       |                 | Total       |                 |
|-------------------------------------|-------------|-----------------|-------------|-----------------|-------------|-----------------|
|                                     | <i>St B</i> | <i>P</i> -value | <i>St B</i> | <i>P</i> -value | <i>St B</i> | <i>P</i> -value |
| Age                                 | -0.125      | < 0.001         |             |                 | -0.139      | < 0.001         |
| BMI (kg/m <sup>2</sup> )            | 0.214       | < 0.001         | 0.188       | < 0.001         | 0.195       | < 0.001         |
| SBP (mmHg)                          | 0.060       | < 0.001         | 0.054       | < 0.001         | 0.087       | < 0.001         |
| FPG (mmol/L)                        | -0.122      | < 0.001         | -0.027      | 0.002           | -0.059      | < 0.001         |
| TC (mmol/L)                         | 0.103       | < 0.001         | 0.111       | < 0.001         | 0.090       | < 0.001         |
| TG (mmol/L)                         | 0.114       | < 0.001         | 0.146       | < 0.001         | 0.107       | < 0.001         |
| HDL-C (mmol/L)                      | -0.085      | < 0.001         | -0.171      | < 0.001         | -0.254      | < 0.001         |
| eGFR (ml/(min*1.73m <sup>2</sup> )) | -0.153      | < 0.001         | -0.147      | < 0.001         | -0.208      | < 0.001         |

Multicollinearity analysis showed that SBP and DBP highly correlate with each other, so do TC and LDL-C. And backward elimination was adopted for multiple linear regression to identify independent variables which have most impact on dependent variables. Finally, Independent variables DBP and LDL-C were removed in male and in total. Independent variables DBP, LDL-C and age were removed in female.

Abbreviations: BMI: body mass index, SBP: systolic blood pressure, DBP: diastolic blood pressure, FPG: fasting plasma glucose, TC: total cholesterol, TG: triglyceride, HDL-C: high density lipoprotein cholesterol, LDL-C: low density lipoprotein cholesterol, eGFR: estimated glomerular filtration rate. Standardized beta coefficients (*St B*) refer to how many standard deviations a dependent variable will change per standard deviation increase in the predictor variable.

**Table 4.** The odds ratio for hyperuricemia according to different status of parameters of men and women.

|                                     | Men                 |         |                     |         | Women                 |         |                     |         |
|-------------------------------------|---------------------|---------|---------------------|---------|-----------------------|---------|---------------------|---------|
|                                     | Unadjusted          |         | Full-adjusted       |         | Unadjusted            |         | Full-adjusted       |         |
|                                     | OR (95%CI)          | P-value | OR (95%CI)          | P-value | OR (95%CI)            | P-value | OR (95%CI)          | P-value |
| BMI (kg/m <sup>2</sup> )            |                     |         |                     |         |                       |         |                     |         |
| 18.5 ≤BMI<24.0 (Ref.)               |                     |         |                     |         |                       |         |                     |         |
| BMI<18.5                            | 0.502 (0.337-0.747) | 0.001   | 0.558 (0.374-0.835) | 0.004   | 0.502 (0.322-0.784)   | 0.002   | 0.636 (0.403-1.005) | 0.052   |
| 24.0≤BMI<28.0                       | 2.165 (1.978-2.368) | < 0.001 | 1.878 (1.707-2.065) | < 0.001 | 2.732 (2.392-3.121)   | < 0.001 | 1.906 (1.649-2.203) | < 0.001 |
| BMI≥28.0                            | 3.972 (2.548-4.448) | < 0.001 | 3.102 (2.745-3.507) | < 0.001 | 5.077 (4.323-5.962)   | < 0.001 | 3.126 (2.611-3.743) | < 0.001 |
| Blood pressure (mmHg)               |                     |         |                     |         |                       |         |                     |         |
| Normotensive (Ref.)                 |                     |         |                     |         |                       |         |                     |         |
| Pre-HT                              | 1.304 (1.185-1.436) | < 0.001 | 1.138 (1.028-1.260) | 0.013   | 1.958 (1.682-2.280)   | < 0.001 | 1.129 (0.953-1.337) | 0.159   |
| Grade1 HT                           | 1.663 (1.493-1.853) | < 0.001 | 1.350 (1.195-1.525) | < 0.001 | 3.321 (2.825-3.903)   | < 0.001 | 1.328 (1.094-1.612) | 0.004   |
| Grade2/3 HT                         | 1.716 (1.491-1.976) | < 0.001 | 1.393 (1.186-1.635) | < 0.001 | 4.887 (4.018-5.945)   | < 0.001 | 1.480 (1.162-1.885) | 0.002   |
| FPG (mmol/L)                        |                     |         |                     |         |                       |         |                     |         |
| FPG<6.1 (Ref.)                      |                     |         |                     |         |                       |         |                     |         |
| 6.1≤FPG<7                           | 1.188 (1.026-1.375) | 0.021   | 0.921 (0.785-1.081) | 0.313   | 2.612 (2.126-3.209)   | < 0.001 | 1.221 (0.972-1.535) | 0.087   |
| FPG≥7                               | 0.655 (0.552-0.776) | < 0.001 | 0.410 (0.340-0.495) | < 0.001 | 2.673 (2.179-3.278)   | < 0.001 | 0.793 (0.624-1.009) | 0.059   |
| Cholesterol (mmol/L)                |                     |         |                     |         |                       |         |                     |         |
| TC≤6.22 (Ref.)                      |                     |         |                     |         |                       |         |                     |         |
| TC>6.22                             | 1.885 (1.610-2.207) | < 0.001 | 1.072 (0.874-1.315) | 0.502   | 2.044 (1.722-2.426)   | < 0.001 | 1.070 (0.835-1.372) | 0.591   |
| Triglyceride (mmol/L)               |                     |         |                     |         |                       |         |                     |         |
| TG≤2.26 (Ref.)                      |                     |         |                     |         |                       |         |                     |         |
| TG>2.26                             | 2.881 (2.636-3.148) | < 0.001 | 2.242 (2.029-2.477) | < 0.001 | 4.603 (4.994-5.305)   | < 0.001 | 2.513 (2.129-2.967) | < 0.001 |
| HDL-C (mmol/L)                      |                     |         |                     |         |                       |         |                     |         |
| HDL-C≥1.04 (Ref.)                   |                     |         |                     |         |                       |         |                     |         |
| HDL-C<1.04                          | 1.651 (1.519-1.795) | < 0.001 | 1.097 (0.999-1.205) | 0.054   | 3.404 (2.898-3.999)   | < 0.001 | 1.929 (1.601-2.324) | < 0.001 |
| LDL-C (mmol/L)                      |                     |         |                     |         |                       |         |                     |         |
| LDL-C≤4.14 (Ref.)                   |                     |         |                     |         |                       |         |                     |         |
| LDL-C>4.14                          | 1.737 (1.506-2.003) | < 0.001 | 1.522 (1.271-1.822) | < 0.001 | 1.871 (1.556-2.251)   | < 0.001 | 1.299 (1.002-1.686) | 0.049   |
| eGFR (ml/(min*1.73m <sup>2</sup> )) |                     |         |                     |         |                       |         |                     |         |
| eGFR≥90 (Ref.)                      |                     |         |                     |         |                       |         |                     |         |
| 60≤eGFR<89                          | 1.175 (1.084-1.273) | < 0.001 | 1.351 (1.235-1.477) | < 0.001 | 1.672 (1.479-1.891)   | < 0.001 | 1.580 (1.377-1.814) | < 0.001 |
| eGFR≤59                             | 3.185 (2.657-3.818) | < 0.001 | 4.461 (3.621-5.496) | < 0.001 | 9.569 (7.633-11.949)  | < 0.001 | 6.453 (4.982-8.356) | < 0.001 |
| Albuminuria                         |                     |         |                     |         |                       |         |                     |         |
| -/+ (Ref.)                          |                     |         |                     |         |                       |         |                     |         |
| +                                   | 1.256 (0.888-1.775) | 0.198   | 0.899 (0.615-1.314) | 0.584   | 6.020 (3.995-9.072)   | < 0.001 | 2.899 (1.791-4.694) | < 0.001 |
| ++                                  | 2.123 (1.464-3.078) | < 0.001 | 1.392 (0.923-2.100) | 0.115   | 3.203 (1.882-5.449)   | < 0.001 | 1.521 (0.824-2.807) | 0.180   |
| +++                                 | 3.166 (1.990-5.036) | < 0.001 | 2.335 (1.393-3.913) | 0.001   | 10.837 (6.108-19.225) | < 0.001 | 4.634 (2.399-8.953) | < 0.001 |
| Urinary pH                          |                     |         |                     |         |                       |         |                     |         |
| 6≤pH<7 (Ref.)                       |                     |         |                     |         |                       |         |                     |         |
| pH<6                                | 1.490 (1.375-1.615) | < 0.001 | 1.602 (1.464-1.752) | < 0.001 | 2.108 (1.875-2.371)   | < 0.001 | 1.839 (1.613-2.098) | < 0.001 |
| pH>7                                | 0.534 (0.415-0.688) | < 0.001 | 0.581 (0.447-0.754) | < 0.001 | 0.653 (0.466-0.915)   | 0.013   | 0.741 (0.521-1.053) | 0.094   |
| Nephrolithiasis                     |                     |         |                     |         |                       |         |                     |         |
| No (Ref.)                           |                     |         |                     |         |                       |         |                     |         |
| Yes                                 | 1.317 (1.191-1.455) | < 0.001 | 1.250 (1.121-1.392) | < 0.001 | 1.553 (1.330-1.815)   | < 0.001 | 1.214 (1.021-1.443) | 0.028   |

Abbreviations: BMI: body mass index, FPG: fasting plasma glucose, TC: total cholesterol, TG: triglyceride, HDL-C: high density lipoprotein cholesterol, LDL-C: low density lipoprotein cholesterol, eGFR: estimated glomerular filtration rate. Blood pressure (mmHg): normotensive: SBP<120 and DBP<80; pre-HT: SBP of 120-139 and/or DBP of 80-89; Grade1 HT: SBP of 140-159 and/or DBP of 90-99; Grade2/3 HT: SBP≥160 and/or DBP≥100

**Table 5.** The association between SUA and Obesity, hypertension, Diabetes mellitus, Dyslipidemia, CKD, Nephrolithiasis in men.

|                        | Q1      | Q2    |             |         | Q3    |             |         | Q4    |             |         |
|------------------------|---------|-------|-------------|---------|-------|-------------|---------|-------|-------------|---------|
|                        | -       | OR    | 95%CI       | P-value | OR    | 95%CI       | P-value | OR    | 95%CI       | P-value |
| Obesity                |         |       |             |         |       |             |         |       |             |         |
| Model1                 | 1(Ref.) | 1.487 | 1.248-1.772 | < 0.001 | 2.420 | 2.044-2.866 | < 0.001 | 4.418 | 3.743-5.214 | < 0.001 |
| Model2 <sup>a</sup>    | 1(Ref.) | 1.355 | 1.130-1.625 | 0.001   | 1.955 | 1.637-2.334 | < 0.001 | 3.102 | 2.600-3.701 | < 0.001 |
| Model3 <sup>1</sup>    | 1(Ref.) | 1.362 | 1.135-1.635 | 0.001   | 1.971 | 1.649-2.356 | < 0.001 | 3.115 | 2.604-3.727 | < 0.001 |
| Hypertension           |         |       |             |         |       |             |         |       |             |         |
| Model1                 | 1(Ref.) | 0.999 | 0.895-1.115 | 0.981   | 1.351 | 1.209-1.509 | < 0.001 | 1.769 | 1.577-1.983 | < 0.001 |
| Model2 <sup>b</sup>    | 1(Ref.) | 0.934 | 0.832-1.048 | 0.246   | 1.146 | 1.019-1.289 | 0.023   | 1.266 | 1.118-1.434 | < 0.001 |
| Model3 <sup>2</sup>    | 1(Ref.) | 0.940 | 0.838-1.056 | 0.298   | 1.164 | 1.034-1.310 | 0.012   | 1.290 | 1.136-1.465 | < 0.001 |
| Diabetes mellitus      |         |       |             |         |       |             |         |       |             |         |
| Model1                 | 1(Ref.) | 0.539 | 0.457-0.636 | < 0.001 | 0.445 | 0.372-0.531 | < 0.001 | 0.407 | 0.335-0.495 | < 0.001 |
| Model2 <sup>c</sup>    | 1(Ref.) | 0.434 | 0.366-0.516 | < 0.001 | 0.289 | 0.239-0.349 | < 0.001 | 0.210 | 0.170-0.259 | < 0.001 |
| Model3 <sup>3</sup>    | 1(Ref.) | 0.442 | 0.371-0.526 | < 0.001 | 0.293 | 0.241-0.356 | < 0.001 | 0.205 | 0.165-0.255 | < 0.001 |
| Dyslipidemia           |         |       |             |         |       |             |         |       |             |         |
| Model1                 | 1(Ref.) | 1.510 | 1.361-1.674 | < 0.001 | 2.116 | 1.907-2.348 | < 0.001 | 3.639 | 3.267-4.053 | < 0.001 |
| Model2 <sup>d</sup>    | 1(Ref.) | 1.428 | 1.282-1.592 | < 0.001 | 1.812 | 1.624-2.023 | < 0.001 | 2.675 | 2.385-3.002 | < 0.001 |
| Model3 <sup>4</sup>    | 1(Ref.) | 1.408 | 1.262-1.570 | < 0.001 | 1.755 | 1.571-1.961 | < 0.001 | 2.503 | 2.226-2.815 | < 0.001 |
| Chronic kidney disease |         |       |             |         |       |             |         |       |             |         |
| Model1                 | 1(Ref.) | 1.698 | 1.199-2.404 | 0.003   | 2.458 | 1.749-3.454 | < 0.001 | 5.883 | 4.254-8.136 | < 0.001 |
| Model2 <sup>e</sup>    | 1(Ref.) | 1.895 | 1.329-2.700 | < 0.001 | 2.745 | 1.935-3.896 | < 0.001 | 6.800 | 4.829-9.576 | < 0.001 |
| Model3 <sup>5</sup>    | 1(Ref.) | 1.894 | 1.325-2.707 | < 0.001 | 2.795 | 1.966-3.975 | < 0.001 | 6.962 | 4.921-9.851 | < 0.001 |
| Nephrolithiasis        |         |       |             |         |       |             |         |       |             |         |
| Model1                 | 1(Ref.) | 1.248 | 1.090-1.428 | 0.001   | 1.292 | 1.126-1.482 | < 0.001 | 1.619 | 1.409-1.861 | < 0.001 |
| Model2 <sup>f</sup>    | 1(Ref.) | 1.163 | 1.015-1.334 | 0.030   | 1.150 | 0.999-1.324 | 0.052   | 1.346 | 1.162-1.560 | < 0.001 |
| Model3 <sup>6</sup>    | 1(Ref.) | 1.225 | 1.067-1.406 | 0.004   | 1.229 | 1.065-1.418 | 0.005   | 1.480 | 1.272-1.722 | < 0.001 |

Model 1: adjusted for age

<sup>a</sup>Model 2: adjusted for variables included in model1 and SBP, DBP, FPG, TC, TG, HDL-C, LDL-C; <sup>b</sup>Model2: adjusted for variables included in model1 and BMI, FPG, TC, TG, HDL-C, LDL-C; <sup>c</sup>Model2: adjusted for variables included in model1 and BMI, SBP, DBP, TC, TG, HDL-C, LDL-C; <sup>d</sup>Model2: adjusted for variables included in model1 and BMI, SBP, DBP, FPG; <sup>e</sup>Model2: adjusted for variables included in model1 and BMI, SBP, DBP, FPG, TC, TG, HDL-C, LDL-C; <sup>f</sup>Model2: adjusted for variables included in model1 and BMI, SBP, DBP, FPG, TC, TG, HDL-C, LDL-C.

<sup>1</sup>Model 3: adjusted for variables included in model2<sup>a</sup> and eGFR, urine Ph, albuminuria, nephrolithiasis; <sup>2</sup>Model 3: adjusted for variables included in model2<sup>b</sup> and eGFR, urine Ph, albuminuria, nephrolithiasis; <sup>3</sup>Model 3: adjusted for variables included in model2<sup>c</sup> and eGFR, urine Ph, albuminuria, nephrolithiasis; <sup>4</sup>Model 3: adjusted for variables included in model2<sup>d</sup> and eGFR, urine Ph, albuminuria, nephrolithiasis; <sup>5</sup>Model 3: adjusted for variables included in model2<sup>e</sup> and urine Ph, albuminuria, nephrolithiasis; <sup>6</sup>Model 3: adjusted for variables included in model2<sup>f</sup> and eGFR, urine Ph, albuminuria.

Abbreviations: BMI: body mass index, SBP: systolic blood pressure, DBP: diastolic blood pressure, FPG: fasting plasma glucose, TC: total cholesterol, TG: triglyceride, HDL-C: high density lipoprotein cholesterol, LDL-C: low density lipoprotein cholesterol, eGFR: estimated glomerular filtration rate.

**Table 6.** The association between SUA and Obesity, hypertension, Diabetes mellitus, Dyslipidemia, CKD, Nephrolithiasis in women.

|                               | Q1      | Q2    |             |         | Q3    |             |         | Q4     |              |         |
|-------------------------------|---------|-------|-------------|---------|-------|-------------|---------|--------|--------------|---------|
|                               | -       | OR    | 95%CI       | P-value | OR    | 95%CI       | P-value | OR     | 95%CI        | P-value |
| <b>Obesity</b>                |         |       |             |         |       |             |         |        |              |         |
| Model1                        | 1(Ref.) | 2.000 | 1.630-2.455 | < 0.001 | 3.568 | 2.902-4.387 | < 0.001 | 5.837  | 4.687-7.269  | < 0.001 |
| Model2 <sup>a</sup>           | 1(Ref.) | 1.652 | 1.338-2.041 | < 0.001 | 2.453 | 1.976-3.045 | < 0.001 | 3.560  | 2.818-4.497  | < 0.001 |
| Model3 <sup>1</sup>           | 1(Ref.) | 1.679 | 1.358-2.076 | < 0.001 | 2.498 | 2.008-3.107 | < 0.001 | 3.755  | 2.956-4.769  | < 0.001 |
| <b>Hypertension</b>           |         |       |             |         |       |             |         |        |              |         |
| Model1                        | 1(Ref.) | 1.285 | 1.133-1.457 | < 0.001 | 1.565 | 1.365-1.794 | < 0.001 | 2.109  | 1.799-2.472  | < 0.001 |
| Model2 <sup>b</sup>           | 1(Ref.) | 1.110 | 0.972-1.267 | 0.123   | 1.120 | 0.967-1.298 | 0.130   | 1.244  | 1.045-1.480  | 0.014   |
| Model3 <sup>2</sup>           | 1(Ref.) | 1.127 | 0.987-1.287 | 0.078   | 1.161 | 1.001-1.347 | 0.049   | 1.287  | 1.075-1.539  | 0.006   |
| <b>Diabetes mellitus</b>      |         |       |             |         |       |             |         |        |              |         |
| Model1                        | 1(Ref.) | 0.868 | 0.683-1.104 | 0.249   | 1.146 | 0.893-1.469 | 0.284   | 1.536  | 1.178-2.004  | 0.002   |
| Model2 <sup>c</sup>           | 1(Ref.) | 0.614 | 0.477-0.791 | < 0.001 | 0.609 | 0.466-0.797 | < 0.001 | 0.588  | 0.437-0.791  | < 0.001 |
| Model3 <sup>3</sup>           | 1(Ref.) | 0.596 | 0.462-0.770 | < 0.001 | 0.566 | 0.431-0.744 | < 0.001 | 0.514  | 0.377-0.701  | < 0.001 |
| <b>Dyslipidemia</b>           |         |       |             |         |       |             |         |        |              |         |
| Model1                        | 1(Ref.) | 1.670 | 1.466-1.903 | < 0.001 | 2.735 | 2.385-3.136 | < 0.001 | 4.761  | 4.075-5.561  | < 0.001 |
| Model2 <sup>d</sup>           | 1(Ref.) | 1.583 | 1.386-1.809 | < 0.001 | 2.385 | 2.071-2.747 | < 0.001 | 3.836  | 3.265-4.508  | < 0.001 |
| Model3 <sup>4</sup>           | 1(Ref.) | 1.575 | 1.378-1.800 | < 0.001 | 2.318 | 2.010-2.673 | < 0.001 | 3.675  | 3.114-4.336  | < 0.001 |
| <b>Chronic kidney disease</b> |         |       |             |         |       |             |         |        |              |         |
| Model1                        | 1(Ref.) | 1.962 | 1.241-3.102 | 0.004   | 3.676 | 2.353-5.745 | < 0.001 | 9.740  | 6.306-15.045 | < 0.001 |
| Model2 <sup>e</sup>           | 1(Ref.) | 2.092 | 1.317-3.322 | 0.002   | 4.096 | 2.591-6.475 | < 0.001 | 11.510 | 7.282-18.193 | < 0.001 |
| Model3 <sup>5</sup>           | 1(Ref.) | 2.051 | 1.291-3.260 | 0.002   | 4.189 | 2.645-6.634 | < 0.001 | 11.508 | 7.242-18.288 | < 0.001 |
| <b>Nephrolithiasis</b>        |         |       |             |         |       |             |         |        |              |         |
| Model1                        | 1(Ref.) | 0.922 | 0.798-1.065 | 0.268   | 1.183 | 1.012-1.383 | 0.035   | 1.312  | 1.090-1.580  | 0.004   |
| Model2 <sup>f</sup>           | 1(Ref.) | 0.853 | 0.736-0.988 | 0.034   | 1.022 | 0.868-1.203 | 0.797   | 1.034  | 0.847-1.262  | 0.742   |
| Model3 <sup>6</sup>           | 1(Ref.) | 0.889 | 0.766-1.032 | 0.123   | 1.111 | 0.940-1.313 | 0.216   | 1.239  | 1.008-1.522  | 0.042   |

Model 1: adjusted for age

<sup>a</sup>Model 2: adjusted for variables included in model1 and SBP, DBP, FPG, TC, TG, HDL-C, LDL-C; <sup>b</sup>Model2: adjusted for variables included in model1 and BMI, FPG, TC, TG, HDL-C, LDL-C; <sup>c</sup>Model2: adjusted for variables included in model1 and BMI, SBP, DBP, TC, TG, HDL-C, LDL-C; <sup>d</sup>Model2: adjusted for variables included in model1 and BMI, SBP, DBP, FPG; <sup>e</sup>Model2: adjusted for variables included in model1 and BMI, SBP, DBP, FPG, TC, TG, HDL-C, LDL-C; <sup>f</sup>Model2: adjusted for variables included in model1 and BMI, SBP, DBP, FPG, TC, TG, HDL-C, LDL-C.

<sup>1</sup>Model 3: adjusted for variables included in model2<sup>a</sup> and eGFR, urine Ph, albuminuria, nephrolithiasis; <sup>2</sup>Model 3: adjusted for variables included in model2<sup>b</sup> and eGFR, urine Ph, albuminuria, nephrolithiasis; <sup>3</sup>Model 3: adjusted for variables included in model2<sup>c</sup> and eGFR, urine Ph, albuminuria, nephrolithiasis; <sup>4</sup>Model 3: adjusted for variables included in model2<sup>d</sup> and eGFR, urine Ph, albuminuria, nephrolithiasis; <sup>5</sup>Model 3: adjusted for variables included in model2<sup>e</sup> and urine Ph, albuminuria, nephrolithiasis; <sup>6</sup>Model 3: adjusted for variables included in model2<sup>f</sup> and eGFR, urine Ph, albuminuria.

Abbreviations: BMI: body mass index, SBP: systolic blood pressure, DBP: diastolic blood pressure, FPG: fasting plasma glucose, TC: total cholesterol, TG: triglyceride, HDL-C: high density lipoprotein cholesterol, LDL-C: low density lipoprotein cholesterol, eGFR: estimated glomerular filtration rate.

**Table 7.** The association between hyperuricemia and clustered CVD risk factors.

| Clustered CVD risk factors | Men        |             |                 |              |             |                 | Women      |              |                 |              |             |                 |
|----------------------------|------------|-------------|-----------------|--------------|-------------|-----------------|------------|--------------|-----------------|--------------|-------------|-----------------|
|                            | Unadjusted |             |                 | Age-adjusted |             |                 | Unadjusted |              |                 | Age-adjusted |             |                 |
|                            | OR         | 95%CI       | <i>P</i> -value | OR           | 95%CI       | <i>P</i> -value | OR         | 95%CI        | <i>P</i> -value | OR           | 95%CI       | <i>P</i> -value |
| 0                          | Ref.       |             |                 |              |             |                 |            |              |                 |              |             |                 |
| 1                          | 1.948      | 1.774-2.140 | < 0.001         | 2.119        | 1.926-2.332 | < 0.001         | 3.337      | 2.887-3.856  | < 0.001         | 2.642        | 2.266-3.081 | < 0.001         |
| 2                          | 2.977      | 2.671-3.318 | < 0.001         | 3.390        | 3.029-3.794 | < 0.001         | 6.116      | 5.199-7.195  | < 0.001         | 4.447        | 3.728-5.304 | < 0.001         |
| ≥3                         | 3.343      | 2.867-3.897 | < 0.001         | 3.804        | 3.252-4.450 | < 0.001         | 8.848      | 7.070-11.075 | < 0.001         | 6.265        | 4.945-7.938 | < 0.001         |
| <i>P</i> value for trend   |            |             | < 0.001         |              |             | < 0.001         |            |              | < 0.001         |              |             | < 0.001         |

Clustered CVD risk factors included obesity, hypertension, diabetes mellitus, dyslipidemia

For peer review only



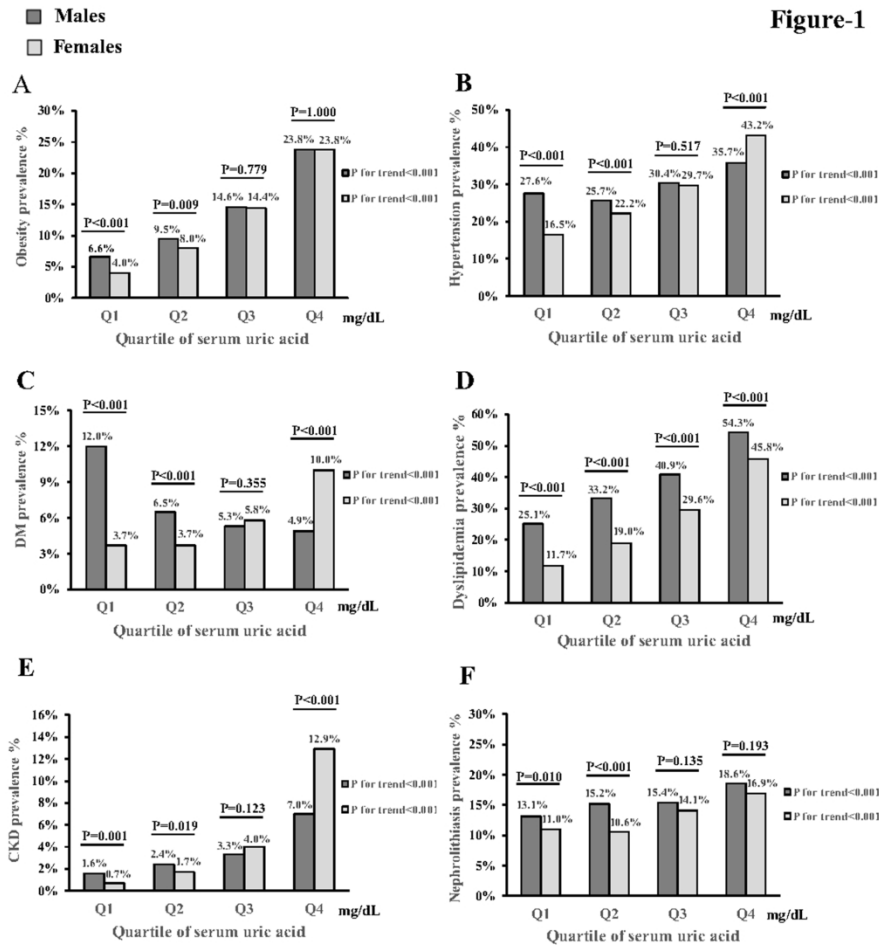

Figure 1. Prevalence of major CVD risk factors, renal diseases in different levels of serum uric acid. Prevalence of obesity(A), hypertension(B), diabetes mellitus(C), dyslipidemia(D), chronic kidney disease (E) and nephrolithiasis(F) in different levels of serum uric acid. The gender-specific quartiles of uric acid (mg/dL), Q1: males (M)  $\leq 4.9$ , females (F)  $\leq 3.9$ ; Q2: M 5.0-5.9, F 4.0-4.9; Q3: M 6.0-6.9, F 5.0-5.9; Q4: M  $\geq 7.0$ , F  $\geq 6.0$ .

190x254mm (300 x 300 DPI)

STROBE Statement—Checklist of items that should be included in reports of *cross-sectional studies*

|                           | Item No | Recommendation                                                                                                                                                                                                                                                                                                                                                                                                                                                                                                                                                                                                                                                                                                                                                                                                                                                                                                                                                                                                                                                                                                                                                                                                                                                                                                                                                                                                                                                                                                                                                                                                                                                                                                                                                                                                                                                                                                                                                                                                                                                                                                                                                                                                                                                                                                                                                                                                                                                                                                                                                                                                                                                                                                                                                                                              |
|---------------------------|---------|-------------------------------------------------------------------------------------------------------------------------------------------------------------------------------------------------------------------------------------------------------------------------------------------------------------------------------------------------------------------------------------------------------------------------------------------------------------------------------------------------------------------------------------------------------------------------------------------------------------------------------------------------------------------------------------------------------------------------------------------------------------------------------------------------------------------------------------------------------------------------------------------------------------------------------------------------------------------------------------------------------------------------------------------------------------------------------------------------------------------------------------------------------------------------------------------------------------------------------------------------------------------------------------------------------------------------------------------------------------------------------------------------------------------------------------------------------------------------------------------------------------------------------------------------------------------------------------------------------------------------------------------------------------------------------------------------------------------------------------------------------------------------------------------------------------------------------------------------------------------------------------------------------------------------------------------------------------------------------------------------------------------------------------------------------------------------------------------------------------------------------------------------------------------------------------------------------------------------------------------------------------------------------------------------------------------------------------------------------------------------------------------------------------------------------------------------------------------------------------------------------------------------------------------------------------------------------------------------------------------------------------------------------------------------------------------------------------------------------------------------------------------------------------------------------------|
| <b>Title and abstract</b> | 1       | <p>(a) The relationship between serum uric acid and clustering of cardiovascular disease risk factors, renal disorders among Shanghai population: a multi-center and cross-sectional study</p> <p>(b) <b>Objectives</b> To estimate the current prevalence of cardiovascular disease risk factors (CRFs) and renal disorders across serum uric acid (SUA) quartiles, and evaluate the relationships between SUA and CRFs, renal diseases in Shanghai population. <b>Study design</b> Observational, cross-sectional study. <b>Setting</b> Data were obtained from physical checkups of local residents at three hospitals in Shanghai. <b>Participants</b> Residents were invited to take part in physical checkups and provided informed consents. Exclusion criteria were diseases that resemble cancer, hepatic disease and other coexisting illnesses including autoimmune kidney diseases, renal artery stenosis, individuals treated with xanthine oxidase inhibitors and without complete information. There are 27176 individuals in our study. <b>Primary and secondary outcome measures</b> Hyperuricemia was defined as SUA <math>\geq 7</math> mg/dL in males and <math>\geq 6</math> mg/dL in females or taking xanthine oxidase inhibitors. Subjects were divided into gender-specific quartiles. We estimate the prevalence of CRFs and renal disorders across SUA quartiles. The relationships between SUA and CRFs, renal disorders at different gender were evaluated with logistic regression analysis. <b>Results:</b> There was a significant increase in the prevalence of major CRFs and renal diseases across SUA quartiles in separate analysis among men and women (all <math>P</math>-trend<math>&lt;0.001</math>). After multiple adjustment, hyperuricemia positively connected with obesity (Male OR=3.115, <math>P&lt;0.001</math>; Female OR=3.755, <math>P&lt;0.001</math>), hypertension (Male OR=1.290, <math>P&lt;0.001</math>; Female OR=1.287, <math>P=0.006</math>), dyslipidemia (Male OR=2.503, <math>P&lt;0.001</math>; Female OR=3.675, <math>P&lt;0.001</math>), chronic kidney disease (Male OR=6.962, <math>P&lt;0.001</math>; Female OR=11.508, <math>P&lt;0.001</math>), nephrolithiasis (Male OR=1.480, <math>P&lt;0.001</math>; Female OR=1.239, <math>P=0.042</math>), but negatively connected with diabetes mellitus ((Male OR=0.205, <math>P&lt;0.001</math>; Female OR=0.514, <math>P&lt;0.001</math>)). Women had a stronger association between hyperuricemia and clustered CRFs, CKD than men. <b>Conclusions:</b> In Shanghai population, concomitant with the elevated level of SUA, the prevalence of CRFs and renal diseases was rising. Hyperuricemia was significantly associated with CRFs and renal disorders, especially in females.</p> |
| <b>Introduction</b>       |         |                                                                                                                                                                                                                                                                                                                                                                                                                                                                                                                                                                                                                                                                                                                                                                                                                                                                                                                                                                                                                                                                                                                                                                                                                                                                                                                                                                                                                                                                                                                                                                                                                                                                                                                                                                                                                                                                                                                                                                                                                                                                                                                                                                                                                                                                                                                                                                                                                                                                                                                                                                                                                                                                                                                                                                                                             |
| Background/rationale      | 2       | The relationship between hyperuricemia and cardiovascular disease risk factors (CRFs) at different gender of Shanghai population has not been well studied. And the data from multiple clinical centers in China are extremely limited. Whether serum uric acid (SUA) is a cause or an association to renal diseases is a question that still waits for further investigations. Thus, we estimate the current prevalence of CRFs and renal disorders across SUA quartiles, and evaluate the relationships between SUA and CRFs, renal diseases in Shanghai population.                                                                                                                                                                                                                                                                                                                                                                                                                                                                                                                                                                                                                                                                                                                                                                                                                                                                                                                                                                                                                                                                                                                                                                                                                                                                                                                                                                                                                                                                                                                                                                                                                                                                                                                                                                                                                                                                                                                                                                                                                                                                                                                                                                                                                                      |
| Objectives                | 3       | To estimate the current prevalence of cardiovascular disease risk factors (CRFs) and renal disorders across serum uric acid (SUA) quartiles, and evaluate the relationships between SUA and CRFs, renal diseases in Shanghai population.                                                                                                                                                                                                                                                                                                                                                                                                                                                                                                                                                                                                                                                                                                                                                                                                                                                                                                                                                                                                                                                                                                                                                                                                                                                                                                                                                                                                                                                                                                                                                                                                                                                                                                                                                                                                                                                                                                                                                                                                                                                                                                                                                                                                                                                                                                                                                                                                                                                                                                                                                                    |
| <b>Methods</b>            |         |                                                                                                                                                                                                                                                                                                                                                                                                                                                                                                                                                                                                                                                                                                                                                                                                                                                                                                                                                                                                                                                                                                                                                                                                                                                                                                                                                                                                                                                                                                                                                                                                                                                                                                                                                                                                                                                                                                                                                                                                                                                                                                                                                                                                                                                                                                                                                                                                                                                                                                                                                                                                                                                                                                                                                                                                             |
| Study design              | 4       | Observational, cross-sectional study                                                                                                                                                                                                                                                                                                                                                                                                                                                                                                                                                                                                                                                                                                                                                                                                                                                                                                                                                                                                                                                                                                                                                                                                                                                                                                                                                                                                                                                                                                                                                                                                                                                                                                                                                                                                                                                                                                                                                                                                                                                                                                                                                                                                                                                                                                                                                                                                                                                                                                                                                                                                                                                                                                                                                                        |
| Setting                   | 5       | Data were obtained from physical checkups of local residents at three hospitals in                                                                                                                                                                                                                                                                                                                                                                                                                                                                                                                                                                                                                                                                                                                                                                                                                                                                                                                                                                                                                                                                                                                                                                                                                                                                                                                                                                                                                                                                                                                                                                                                                                                                                                                                                                                                                                                                                                                                                                                                                                                                                                                                                                                                                                                                                                                                                                                                                                                                                                                                                                                                                                                                                                                          |

|                                                                 |    |                                                                                                                                                                                                                                                                                                                                                                                                                                                                                                                                                                                                                                                                                                                                                                                                                                                                                                                                                                                                                                                                                                                                                                                                                                                                                                                                                                                                                                                                                                                                                                                                                                                                                                                                                                                                                                                                                                                                                                                                                                                                                                                                                                                                                                                                                                                                                   |
|-----------------------------------------------------------------|----|---------------------------------------------------------------------------------------------------------------------------------------------------------------------------------------------------------------------------------------------------------------------------------------------------------------------------------------------------------------------------------------------------------------------------------------------------------------------------------------------------------------------------------------------------------------------------------------------------------------------------------------------------------------------------------------------------------------------------------------------------------------------------------------------------------------------------------------------------------------------------------------------------------------------------------------------------------------------------------------------------------------------------------------------------------------------------------------------------------------------------------------------------------------------------------------------------------------------------------------------------------------------------------------------------------------------------------------------------------------------------------------------------------------------------------------------------------------------------------------------------------------------------------------------------------------------------------------------------------------------------------------------------------------------------------------------------------------------------------------------------------------------------------------------------------------------------------------------------------------------------------------------------------------------------------------------------------------------------------------------------------------------------------------------------------------------------------------------------------------------------------------------------------------------------------------------------------------------------------------------------------------------------------------------------------------------------------------------------|
| Shanghai during the period from January 2015 and December 2015. |    |                                                                                                                                                                                                                                                                                                                                                                                                                                                                                                                                                                                                                                                                                                                                                                                                                                                                                                                                                                                                                                                                                                                                                                                                                                                                                                                                                                                                                                                                                                                                                                                                                                                                                                                                                                                                                                                                                                                                                                                                                                                                                                                                                                                                                                                                                                                                                   |
| Participants                                                    | 6  | Residents were invited to take part in physical checkups and provided informed consents. Exclusion criteria were diseases that resemble cancer, hepatic disease and other coexisting illnesses including autoimmune kidney diseases, renal artery stenosis, individuals treated with xanthine oxidase inhibitors and without complete information. There are 27176 individuals in our study.                                                                                                                                                                                                                                                                                                                                                                                                                                                                                                                                                                                                                                                                                                                                                                                                                                                                                                                                                                                                                                                                                                                                                                                                                                                                                                                                                                                                                                                                                                                                                                                                                                                                                                                                                                                                                                                                                                                                                      |
| Variables                                                       | 7  | Hyperuricemia was defined as serum uric acid $\geq 7$ mg/dL in males and $\geq 6$ mg/dL in females or current use of xanthine oxidase inhibitors. SUA was determined using the uricase-peroxidase method. Body mass index (BMI) was calculated as weight in kilograms divided by height in squared meters. According to WHO guidelines for the Asian Pacific population, normal weight was defined as $18.5 \leq \text{BMI} < 24.0$ kg/m <sup>2</sup> , overweight was defined as $24.0 \leq \text{BMI} < 28.0$ kg/m <sup>2</sup> , obesity was defined as BMI $\geq 28.0$ kg/m <sup>2</sup> , underweight was defined as BMI $< 18.5$ kg/m <sup>2</sup> . Blood pressure measurements were taken according to the Joint National Committee VII criteria (JNC VII). Normal BP was defined as having SBP $< 120$ mmHg and DBP $< 80$ mmHg. Pre-hypertension was defined as having SBP of 120–139 mmHg and/or DBP of 80–89 mmHg. Grade 1 hypertension was defined as having SBP of 140–159 mmHg and/or DBP of 90–99 mmHg. Grade 2 or grade 3 hypertension was defined as SBP $\geq 160$ mmHg and/or DBP $\geq 100$ mmHg. According to the Chinese adult dyslipidemia prevention guide (2007 edition), individuals with a fasting TC $\geq 6.22$ mmol/L, TG $\geq 2.26$ mmol/L, HDL-C $< 1.04$ mmol/L, and/or LDL-C $> 4.14$ mmol/L, or currently undergoing pharmacologic treatment were defined as the dyslipidemia. T2D was defined based on World Health Organization (WHO) 1999 diagnostic criteria as fasting plasma glucose $\geq 7.0$ mmol/l or 2-h plasma glucose $\geq 11.1$ mmol/l, impaired fasting glucose (IFG) was defined as $6.1 \text{ mmol/l} \leq \text{FPG} < 7.0 \text{ mmol/l}$ , and normal condition was defined as $\text{FPG} < 6.1 \text{ mmol/l}$ . The eGFR was calculated using Modification of Diet in Renal Disease (MDRD) formula: $186 \times [\text{serum creatinine (mg/dl)}]^{-1.154} \times (\text{age})^{-0.203} \times [0.742 \text{ (if female)}]$ . According to the Kidney Disease Outcomes Quality Initiative (KDOQI) clinical practice guideline, estimated glomerular filtration rate (eGFR) $< 60 \text{ mL/min/1.73 m}^2$ , proteinuria and hematuria were defined as markers of CKD. Urine proteinuria were recorded as negative (–), trace, 1+, 2+ and 3+. Albuminuria was defined as $\geq 1+$ . |
| Data sources/<br>measurement                                    | 8* | The permanent residents aged between 16-98 years who participated in the health checkups during the period from January 2015 and December 2015 of three medical centers Shanghai East Hospital Affiliated to Tongji University School of Medicine, Pudong New District Gongli Hospital and Baoshan Branch of Shanghai First People's Hospital were invited in the study. We divided the subjects into gender-specific quartiles [males (M): Q1 $\leq 4.9$ , Q2: 5.0-5.9, Q3: 6.0-6.9, Q4 $\geq 7.0$ mg/dL; females (F): Q1 $\leq 3.9$ , Q2: 4.0-4.9, Q3: 5.0-5.9, Q4 $\geq 6.0$ mg/dL] according to serum uric acid level.                                                                                                                                                                                                                                                                                                                                                                                                                                                                                                                                                                                                                                                                                                                                                                                                                                                                                                                                                                                                                                                                                                                                                                                                                                                                                                                                                                                                                                                                                                                                                                                                                                                                                                                        |
| Bias                                                            | 9  | We conducted a multi-center study with large sample size to reduce selection bias. We set a strict exclusion criteria based on medical histories and laboratory findings to reduce information bias.                                                                                                                                                                                                                                                                                                                                                                                                                                                                                                                                                                                                                                                                                                                                                                                                                                                                                                                                                                                                                                                                                                                                                                                                                                                                                                                                                                                                                                                                                                                                                                                                                                                                                                                                                                                                                                                                                                                                                                                                                                                                                                                                              |
| Study size                                                      | 10 | There are 27176 individuals in our study.                                                                                                                                                                                                                                                                                                                                                                                                                                                                                                                                                                                                                                                                                                                                                                                                                                                                                                                                                                                                                                                                                                                                                                                                                                                                                                                                                                                                                                                                                                                                                                                                                                                                                                                                                                                                                                                                                                                                                                                                                                                                                                                                                                                                                                                                                                         |
| Quantitative variables                                          | 11 | The continuous variables are reported in means $\pm$ SD and categorical variables are presented in percentages. In case of nonparametric data distribution medians with inter quartile range (IQR) are presented. The univariate analysis of variance (ANOVA) was used to measure the data among the groups or a Kruskal-Wallis test in case of nonparametric data distribution. Differences between groups for proportions were                                                                                                                                                                                                                                                                                                                                                                                                                                                                                                                                                                                                                                                                                                                                                                                                                                                                                                                                                                                                                                                                                                                                                                                                                                                                                                                                                                                                                                                                                                                                                                                                                                                                                                                                                                                                                                                                                                                  |

tested with a chi-square test. If the results show differences between the groups, the post-hoc tests would be done. As for the post-hoc test, we used least significance difference (LSD) test if the variance was homogeneous, and we used Tamhane's T2 test if not.

|                     |    |                                                                                                                                                                                                                                                                                                                                                                                                                                                                                                                                                                                                                                                                                                                                                                                                                                                                                                                                                                                                                                                                                                                                                                                                                                                                                               |
|---------------------|----|-----------------------------------------------------------------------------------------------------------------------------------------------------------------------------------------------------------------------------------------------------------------------------------------------------------------------------------------------------------------------------------------------------------------------------------------------------------------------------------------------------------------------------------------------------------------------------------------------------------------------------------------------------------------------------------------------------------------------------------------------------------------------------------------------------------------------------------------------------------------------------------------------------------------------------------------------------------------------------------------------------------------------------------------------------------------------------------------------------------------------------------------------------------------------------------------------------------------------------------------------------------------------------------------------|
| Statistical methods | 12 | Correlations were Pearson's or Spearman's depending on the distribution of the data. In the present study, SUA, age, BMI, SBP, DBP, FPG, TC, TG, HDL-C, LDL-C, eGFR were normally distributed. Thus, Pearson's correlation was used among these variables. If Pearson's correlation analysis was statistically significant, multiple linear regression analysis was performed to determine the association of SUA with various independent variables. We analyzed the multiple collinearity by calculating the correlation coefficient matrix, tolerance and variance inflation factor of independent variables. Multivariable logistic regression analysis (unadjusted and full-adjusted) was used to calculate the odds ratio for hyperuricemia according to different status of clinical parameters. Furthermore, multivariable logistic regression analysis (multiple adjusted models) was used to examine the association between related diseases and the SUA categories of Q2 or greater compared to the lowest SUA category. The association between hyperuricemia and clustered CVD risk factors had been calculated. Statistical analyses were performed by IBM SPSS statistics version 20.0 (SPSS, Chicago, IL, USA). Statistical significance was set at $P$ -values of $<0.05$ . |
|---------------------|----|-----------------------------------------------------------------------------------------------------------------------------------------------------------------------------------------------------------------------------------------------------------------------------------------------------------------------------------------------------------------------------------------------------------------------------------------------------------------------------------------------------------------------------------------------------------------------------------------------------------------------------------------------------------------------------------------------------------------------------------------------------------------------------------------------------------------------------------------------------------------------------------------------------------------------------------------------------------------------------------------------------------------------------------------------------------------------------------------------------------------------------------------------------------------------------------------------------------------------------------------------------------------------------------------------|

## Results

|                  |     |                                                                                                                                                                                                                                                                                                                                                                                                                                                                                                                                                                                                                                                                                                                                                                                                                                                                                                                                                                                                                                                                                                                                                  |
|------------------|-----|--------------------------------------------------------------------------------------------------------------------------------------------------------------------------------------------------------------------------------------------------------------------------------------------------------------------------------------------------------------------------------------------------------------------------------------------------------------------------------------------------------------------------------------------------------------------------------------------------------------------------------------------------------------------------------------------------------------------------------------------------------------------------------------------------------------------------------------------------------------------------------------------------------------------------------------------------------------------------------------------------------------------------------------------------------------------------------------------------------------------------------------------------|
| Participants     | 13* | After excluding subjects with incomplete data, cancer, hepatic disease or other coexisting illnesses including autoimmune kidney diseases, renal artery stenosis and subjects treated with xanthine oxidase inhibitors, 27176 participants were enrolled in our study.                                                                                                                                                                                                                                                                                                                                                                                                                                                                                                                                                                                                                                                                                                                                                                                                                                                                           |
| Descriptive data | 14* | According to our multi-center epidemiologic study of 27176 subjects, the prevalence of hyperuricemia in Shanghai was 17.4% (95%CI 17.0%-17.9%), 22.3% (21.7–23.0%) in men and 11.1% (10.6–11.7%) in women.                                                                                                                                                                                                                                                                                                                                                                                                                                                                                                                                                                                                                                                                                                                                                                                                                                                                                                                                       |
| Outcome data     | 15* | In the male hyperuricemia individuals, the prevalence rates of obesity, hypertension, diabetes mellitus, dyslipidemia, chronic kidney disease and nephrolithiasis were 23.8% (95% CI, 22.4-25.3%), 35.7% (34.1-37.3%), 4.9% (4.2-5.6%), 54.3% (52.6-56.0%), 7.0% (6.1-7.8%) and 18.6% (17.3-19.9%) respectively. In the female hyperuricemia individuals, the prevalence rates of obesity, hypertension, diabetes mellitus, dyslipidemia, chronic kidney disease and nephrolithiasis were 23.8% (21.5-26.1%), 43.2% (40.6-45.9%), 10.0% (8.4-11.6%), 45.8% (43.1-48.5%), 12.9% (11.1-14.7%) and 16.9% (14.9-19.0%) respectively.                                                                                                                                                                                                                                                                                                                                                                                                                                                                                                                 |
| Main results     | 16  | Multivariable logistic regression analysis (multiple adjusted models) was studied and the results were shown in Table 5. The odd ratio for obesity, hypertension, diabetes mellitus, dyslipidemia, chronic kidney disease, nephrolithiasis in the highest SUA quartile was 3.115 (95% CI 2.604–3.727, $P < 0.001$ , model 3), 1.290 (95% CI 1.136–1.465, $P < 0.001$ , model 3), 0.205 (95% CI 0.165–0.255, $P < 0.001$ , model 3), 2.503 (95% CI 2.226–2.815, $P < 0.001$ , model 3), 6.962 (95% CI 4.921–9.851, $P < 0.001$ , model 3), 1.480 (95% CI 1.272–1.722, $P < 0.001$ , model 3) compared with that in the lowest SUA quartile, respectively, in men. The data in Table 6 were multivariable logistic regression analysis in women and the odd ratio for obesity, hypertension, diabetes mellitus, dyslipidemia, chronic kidney disease, nephrolithiasis in the highest SUA quartile was 3.755 (95% CI 2.956–4.769, $P < 0.001$ , model 3), 1.287 (95% CI 1.075–1.539, $P = 0.006$ , model 3), 0.514 (95% CI 0.377–0.701, $P < 0.001$ , model 3), 3.675 (95% CI 3.114–4.336, $P < 0.001$ , model 3), 11.508 (95% CI 7.242–18.288, $P$ |

<0.001, model 3), 1.239 (95% CI 1.008–1.522,  $P=0.042$ , model 3) compared with that in the lowest SUA quartile, respectively.

|                |    |                                                                                                                                                                                                                                                                                                                                                                                                                                                                                                                                                                                                                                                                            |
|----------------|----|----------------------------------------------------------------------------------------------------------------------------------------------------------------------------------------------------------------------------------------------------------------------------------------------------------------------------------------------------------------------------------------------------------------------------------------------------------------------------------------------------------------------------------------------------------------------------------------------------------------------------------------------------------------------------|
| Other analyses | 17 | Multivariable logistic regression was analyzed for hyperuricemia and clustered CVD risk factors, the results were shown in Table 7. After adjustment for age, compared with the group of zero CVD risk factor reference group, the odd ratio for group of $\geq 3$ CVD risk factors was 3.804 (95% CI 3.252–4.450, $P < 0.001$ ), 6.265 (95% CI 4.945–7.938, $P < 0.001$ ) in men and women, respectively. The individuals with more CVD risk factors were associated with the higher ORs of hyperuricemia both in men and women ( $P$ for trend $< 0.001$ ). Furthermore, females had a stronger association of hyperuricemia with clustered CVD risk factors than males. |
|----------------|----|----------------------------------------------------------------------------------------------------------------------------------------------------------------------------------------------------------------------------------------------------------------------------------------------------------------------------------------------------------------------------------------------------------------------------------------------------------------------------------------------------------------------------------------------------------------------------------------------------------------------------------------------------------------------------|

## Discussion

|                  |    |                                                                                                                                                                                                                                                                                                                                                                                                                                                                 |
|------------------|----|-----------------------------------------------------------------------------------------------------------------------------------------------------------------------------------------------------------------------------------------------------------------------------------------------------------------------------------------------------------------------------------------------------------------------------------------------------------------|
| Key results      | 18 | In summary, our data demonstrated that the increasing prevalent rate of CRFs and renal disorders were significantly correlated with the elevated level of serum uric acid. Hyperuricemia was remarkably linked with CVD-related risk factors and kidney diseases. Furthermore, a close correlation between hyperuricemia and clustered CVD risk factors, CKD was observed in females than in males.                                                             |
| Limitations      | 19 | This study has some limitations that need to be mentioned. First, it was a cross-section study and the results could not establish causative relationships between hyperuricemia and CRFs clustering and renal diseases. Second, the data were from three medical centers' databases that lacked details in waist circumference, HOMA-IR, smoking, drinking, lifestyles, diet and pharmacotherapy, which might affect the deviations of some clinical outcomes. |
| Interpretation   | 20 | It was a cross-section study and the results could not establish causative relationships between hyperuricemia and CRFs clustering and renal diseases. Future follow-up studies are required for more accurate evaluation of these relationships.                                                                                                                                                                                                               |
| Generalisability | 21 | In Shanghai population, concomitant with the elevated level of serum uric acid, the prevalence of CRFs and renal diseases was rising. Hyperuricemia was significantly associated with CVD risk factors and renal disorders. Therefore, target inhibition of SUA level may have potential to become an effective therapy in alleviating risks of CVDs and renal disorders, especially in females.                                                                |

## Other information

|         |    |                                                                                                                                                                                                                                                                                                                                                                                                  |
|---------|----|--------------------------------------------------------------------------------------------------------------------------------------------------------------------------------------------------------------------------------------------------------------------------------------------------------------------------------------------------------------------------------------------------|
| Funding | 22 | This study was also supported by the National Nature Science Foundation of China grants (81670690, 81470991 and 81200492 to N.L., 81670623, 81470920 and 81270778 to S.Z.), US National Institutes of Health (2R01DK08506505A1 to S.Z.), Shanghai Health Bureau grant (20134464 to X.P.) and the Key Discipline Construction Project of Pudong Health Bureau of Shanghai (PWZxk2017-05 to N.L.). |
|---------|----|--------------------------------------------------------------------------------------------------------------------------------------------------------------------------------------------------------------------------------------------------------------------------------------------------------------------------------------------------------------------------------------------------|

\*Give information separately for exposed and unexposed groups.

**Note:** An Explanation and Elaboration article discusses each checklist item and gives methodological background and published examples of transparent reporting. The STROBE checklist is best used in conjunction with this article (freely available on the Web sites of PLoS Medicine at <http://www.plosmedicine.org/>, Annals of Internal Medicine at <http://www.annals.org/>, and Epidemiology at <http://www.epidem.com/>). Information on the STROBE Initiative is available at [www.strobe-statement.org](http://www.strobe-statement.org).

# BMJ Open

## The relationship between serum uric acid and clustering of cardiovascular disease risk factors, renal disorders among Shanghai population: a multi-center and cross-sectional study

|                                 |                                                                                                                                                                                                                                                                                                                                                                                                                                                                                                                                                                                                                                                                                                                                                                                                                                                                                                                                                                                                                                                                                                                                                                                                                                 |
|---------------------------------|---------------------------------------------------------------------------------------------------------------------------------------------------------------------------------------------------------------------------------------------------------------------------------------------------------------------------------------------------------------------------------------------------------------------------------------------------------------------------------------------------------------------------------------------------------------------------------------------------------------------------------------------------------------------------------------------------------------------------------------------------------------------------------------------------------------------------------------------------------------------------------------------------------------------------------------------------------------------------------------------------------------------------------------------------------------------------------------------------------------------------------------------------------------------------------------------------------------------------------|
| Journal:                        | <i>BMJ Open</i>                                                                                                                                                                                                                                                                                                                                                                                                                                                                                                                                                                                                                                                                                                                                                                                                                                                                                                                                                                                                                                                                                                                                                                                                                 |
| Manuscript ID                   | bmjopen-2018-025453.R2                                                                                                                                                                                                                                                                                                                                                                                                                                                                                                                                                                                                                                                                                                                                                                                                                                                                                                                                                                                                                                                                                                                                                                                                          |
| Article Type:                   | Research                                                                                                                                                                                                                                                                                                                                                                                                                                                                                                                                                                                                                                                                                                                                                                                                                                                                                                                                                                                                                                                                                                                                                                                                                        |
| Date Submitted by the Author:   | 29-Dec-2018                                                                                                                                                                                                                                                                                                                                                                                                                                                                                                                                                                                                                                                                                                                                                                                                                                                                                                                                                                                                                                                                                                                                                                                                                     |
| Complete List of Authors:       | Tao, Min; Department of Nephrology, Shanghai East Hospital, Tongji University School of Medicine<br>Pi, Xiaoling; Department of Internal Medicine, Pudong New District Gongli Hospital<br>Ma, Xiaoyan; Department of Nephrology, Shanghai East Hospital, Tongji University School of Medicine; Department of Nephrology, Baoshan Branch of First People's Hospital, Shanghai Jiaotong University<br>Shi, Yingfeng; Department of Nephrology, Shanghai East Hospital, Tongji University School of Medicine<br>Zhang, Yuzhen; Key Laboratory of Arrhythmias of the Ministry of Education of China, Research Center for Translational Medicine, Shanghai East Hospital, Tongji University School of Medicine<br>Gu, Hongwei; Department of Nephrology, Shanghai East Hospital, Tongji University School of Medicine<br>Chi, Yongbin; Department of Medical Laboratory, Pudong New District Gongli Hospital<br>Zhuang, Shougang; Department of Nephrology, Shanghai East Hospital, Tongji University School of Medicine; Department of Medicine, Rhode Island Hospital and Brown University School of Medicine<br>Liu, Na; Department of Nephrology, Shanghai East Hospital, Tongji University School of Medicine, Shanghai, China, |
| <b>Primary Subject Heading</b>: | Epidemiology                                                                                                                                                                                                                                                                                                                                                                                                                                                                                                                                                                                                                                                                                                                                                                                                                                                                                                                                                                                                                                                                                                                                                                                                                    |
| Secondary Subject Heading:      | Cardiovascular medicine, Renal medicine                                                                                                                                                                                                                                                                                                                                                                                                                                                                                                                                                                                                                                                                                                                                                                                                                                                                                                                                                                                                                                                                                                                                                                                         |
| Keywords:                       | Serum uric acid, cardiovascular disease risk factors, renal disorders                                                                                                                                                                                                                                                                                                                                                                                                                                                                                                                                                                                                                                                                                                                                                                                                                                                                                                                                                                                                                                                                                                                                                           |
|                                 |                                                                                                                                                                                                                                                                                                                                                                                                                                                                                                                                                                                                                                                                                                                                                                                                                                                                                                                                                                                                                                                                                                                                                                                                                                 |

SCHOLARONE™  
Manuscripts

1  
2  
3  
4 1 **The relationship between serum uric acid and clustering of cardiovascular disease risk factors,**  
5  
6  
7 2 **renal disorders among Shanghai population: a multi-center and cross-sectional study**

8  
9 3 Min Tao<sup>1\*</sup>, Xiaoling Pi<sup>2\*</sup>, Xiaoyan Ma<sup>1,3\*</sup>, Yingfeng Shi<sup>1</sup>, Yuzhen Zhang<sup>4</sup>, Hongwei Gu<sup>1</sup>, Yongbin Chi<sup>5</sup>,  
10  
11  
12 4 Shougang Zhuang<sup>1,6</sup>, Na Liu<sup>1</sup>  
13  
14  
15 5  
16

17 6 <sup>1</sup>Department of Nephrology, Shanghai East Hospital, Tongji University School of Medicine, Shanghai,  
18  
19  
20 7 China;  
21  
22

23 8 <sup>2</sup>Department of Internal Medicine, Pudong New District Gongli Hospital, Shanghai, China;  
24

25  
26 9 <sup>3</sup>Department of Nephrology, Baoshan Branch of First People's Hospital, Shanghai Jiaotong University,  
27  
28  
29 10 Shanghai, China  
30

31 11 <sup>4</sup>Key Laboratory of Arrhythmias of the Ministry of Education of China, Research Center for Translational  
32  
33  
34 12 Medicine, Shanghai East Hospital, Tongji University School of Medicine, Shanghai, China  
35

36  
37 13 <sup>5</sup>Department of Medical Laboratory, Pudong New District Gongli Hospital, Shanghai, China  
38

39 14 <sup>6</sup>Department of Medicine, Rhode Island Hospital and Brown University School of Medicine, Providence,  
40  
41  
42 15 RI, USA  
43  
44  
45 16

46  
47 17 \* Min Tao, Xiaoling Pi and Xiaoyan Ma contributed equally to this work.  
48  
49  
50 18  
51

52  
53 19 **Corresponding author: Na Liu, M.D., Ph.D.,** Department of Nephrology, Shanghai East Hospital,  
54  
55  
56 20 Tongji University School of Medicine, 150 Jimo road, Pudong new district, Shanghai 200120,  
57  
58 21 China. **E-mail:** naliubrown@163.com.  
59  
60



## ABSTRACT

**Objectives** To estimate the current prevalence of cardiovascular disease risk factors (CRFs) and renal disorders across serum uric acid (SUA) quartiles, and evaluate the relationships between SUA and CRFs, renal diseases in Shanghai population.

**Study design** Observational, cross-sectional study.

**Setting** Data were obtained from physical checkups of local residents at three hospitals in Shanghai.

**Participants** Residents were invited to take part in physical checkups and provided informed consents.

Exclusion criteria were diseases that resemble cancer, hepatic disease and other coexisting illnesses including autoimmune kidney diseases, renal artery stenosis, individuals treated with xanthine oxidase inhibitors and without complete information. There are 26768 individuals in our study.

**Primary and secondary outcome measures** Hyperuricemia was defined as SUA  $\geq 7$  mg/dL in males and  $\geq 6$  mg/dL in females or taking xanthine oxidase inhibitors. Subjects were divided into gender-specific quartiles. We estimate the prevalence of CRFs and renal disorders across SUA quartiles. The relationships between SUA and CRFs, renal disorders at different gender were evaluated with logistic regression analysis.

**Results:** There was a significant increase in the prevalence of major CRFs and renal diseases across SUA quartiles in separate analysis among men and women (all  $P$ -trend $<0.001$ ). After multiple adjustment, hyperuricemia positively correlated with obesity (Male OR=3.165,  $P<0.001$ ; Female OR=3.776,  $P<0.001$ ), hypertension (Male OR=1.341,  $P<0.001$ ; Female OR=1.289,  $P=0.006$ ), dyslipidemia (Male OR=2.490,  $P<0.001$ ; Female OR=3.614,  $P<0.001$ ), chronic kidney disease (Male OR=7.081,  $P<0.001$ ; Female OR=11.571,  $P<0.001$ ), nephrolithiasis (Male OR=1.469,  $P<0.001$ ; Female OR=1.242,  $P=0.041$ ),



1  
2  
3  
4 43 but negatively correlated with diabetes mellitus (Male OR=0.206,  $P<0.001$ ; Female OR=0.524,  $P<0.001$ ).  
5  
6

7 44 Women had a stronger association between hyperuricemia and clustered CRFs as well as CKD than men.  
8

9  
10 45 **Conclusions:** In Shanghai population, concomitant with the elevated level of SUA, the prevalence of  
11  
12 46 CRFs and renal diseases was rising. Hyperuricemia was significantly associated with CRFs and renal  
13  
14  
15 47 disorders, especially in females.  
16

17  
18 48 **KEY WORDS:** Serum uric acid, cardiovascular disease risk factors, renal disorders  
19  
20 49  
21  
22

## 23 50 **ARTICLE SUMMARY**

24  
25

### 26 51 **Article focus**

- 27  
28 52 ● The current prevalence of cardiovascular disease risk factors (CRFs) and renal diseases across serum  
29  
30  
31 53 uric acid (SUA) quartiles.  
32  
33
- 34 54 ● The relationships between SUA and CRFs, renal disorders in Shanghai population.  
35  
36

### 37 55 **Key messages**

- 38  
39 56 ● In Shanghai population, concomitant with the elevated level of serum uric acid, the prevalence rate of  
40  
41  
42 57 CRFs and renal diseases was rising.  
43  
44
- 45 58 ● Hyperuricemia was significantly associated with cardiovascular disease (CVD) risk factors and renal  
46  
47  
48 59 disorders, especially in females.  
49

### 50 60 **Strengths and limitations of this study**

51  
52

- 53 61 ● There is a strict exclusion criteria based on medical histories and laboratory findings.  
54  
55
- 56 62 ● We conducted a multi-center study with large sample size which ensured sufficient power in  
57  
58  
59  
60

1  
2  
3  
4 63 obtaining the accurate prevalent rate of CRFs and renal diseases and analyzing the relationship  
5  
6  
7 64 between SUA and CRFs, renal disorders across SUA quartiles.  
8

9  
10 65 ● The relationship was analyzed in both sexes and we got a solid conclusion about the differences  
11  
12 66 between men and women.  
13

14  
15 67 ● It was a cross-section study and the results could not establish causative relationships between  
16  
17 68 hyperuricemia and CRFs clustering and renal diseases.  
18

19  
20 69 ● The data were from three medical centers' databases that lacked details in waist circumference,  
21  
22  
23 70 HOMA-IR (homeostasis model assessment of insulin resistance), smoking, drinking, lifestyles, diet  
24  
25  
26 71 and pharmacotherapy, which might affect the deviations of some clinical outcomes.  
27

## INTRODUCTION

Uric acid (UA) is the final degradation product of purine metabolism in the liver, muscles and intestines.<sup>1</sup> A high level of serum uric acid (SUA) is correlated with multiple disorders such as metabolic syndrome, cardiovascular disease as well as kidney diseases.<sup>2-4</sup> The association between hyperuricemia and CVD risk factors has been widely focused since the last century.<sup>5</sup> There are various risk factors involved in CVDs, including age, sex, obesity, hypertension, diabetes mellitus, dyslipidemia, family history, smoking, depression and so on.<sup>6-8</sup> Numerous indexes of CVDs risk factors were closely associated with increased serum uric acid, such as body mass index (BMI), cholesterol, triglyceride, low-density lipoprotein (LDL), and high-density lipoprotein (HDL), systolic blood pressure (SBP), diastolic blood pressure (DBP), fasting plasma glucose (FPG).<sup>6-9</sup> However, the relationship between hyperuricemia and cardiovascular disease risk factors (CRFs) at different gender of Shanghai population has not been well studied. And the data from multiple clinical centers in China are extremely limited. In this study, we evaluated the prevalence of major CRFs (obesity, hypertension, diabetes mellitus, dyslipidemia) across SUA quartiles and analyzed the association of these factors with SUA level respectively in both men and women.

It has been documented that 70% of the daily UA production is excreted by the kidney.<sup>10</sup> UA tends to crystallize in low urine pH. Hyperuricemia reduces urine pH, and increases the risk of formation of urate stones.<sup>11</sup> Recent research indicated that serum uric acid level could predict the development of albuminuria.<sup>12-13</sup> And elevated serum uric acid level was significantly associated with estimated glomerular filtrate rate (eGFR) decline.<sup>14-15</sup> However, whether UA is a cause or an association to renal diseases is a question that still waits for further investigations. Thus, we assessed the prevalence of renal

diseases across SUA quartiles, and the relationship between serum uric acid and renal disorders in Shanghai population.

## METHODS

### Study population

The permanent residents aged between 16-98 years who participated in the health checkups during the period from January 2015 and December 2015 of three medical centers Shanghai East Hospital Affiliated to Tongji University School of Medicine, Pudong New District Gongli Hospital and Baoshan Branch of Shanghai First People's Hospital were invited in the study. After excluding subjects with incomplete data, cancer, hepatic disease or other coexisting illnesses including autoimmune kidney diseases, renal artery stenosis and subjects treated with xanthine oxidase inhibitors, 26768 participants were enrolled in our study.

### The primary outcomes

Hyperuricemia was defined as serum uric acid  $\geq 7$  mg/dL in males and  $\geq 6$  mg/dL in females or current use of xanthine oxidase inhibitors.<sup>16</sup> SUA was determined using the uricase-peroxidase method.

### Study definitions

Body mass index (BMI) was calculated as weight in kilograms divided by height in squared meters. According to WHO guidelines for the Asian Pacific population, normal weight was defined as  $18.5 \leq \text{BMI} < 24.0$  kg/m<sup>2</sup>, overweight was defined as  $24.0 \leq \text{BMI} < 28.0$  kg/m<sup>2</sup>, obesity was defined as  $\text{BMI} \geq 28.0$  kg/m<sup>2</sup>, underweight was defined as  $\text{BMI} < 18.5$  kg/m<sup>2</sup>.<sup>17</sup> Blood pressure measurements were taken according to the Joint National Committee VII criteria (JNC VII).<sup>18</sup> Normal BP was defined as having SBP < 120 mmHg and DBP < 80 mmHg. Pre-hypertension was defined as having SBP of 120–139 mmHg

1  
2  
3  
4125 and/or DBP of 80–89 mmHg. Grade 1 hypertension was defined as having SBP of 140–159 mmHg  
5  
6  
7126 and/or DBP of 90–99 mmHg. Grade 2 or grade 3 hypertension was defined as SBP  $\geq$ 160 mmHg and/or  
8  
9  
1027 DBP  $\geq$ 100 mmHg.<sup>18</sup> According to the Chinese adult dyslipidemia prevention guide (2007 edition),  
11  
1228 individuals with a fasting TC  $\geq$ 6.22 mmol/L, TG  $\geq$ 2.26 mmol/L, HDL-C $<$ 1.04 mmol/L, and/or  
13  
14  
1529 LDL-C $>$ 4.14 mmol/L, or currently undergoing pharmacologic treatment were defined as the  
16  
17  
1830 dyslipidemia.<sup>19</sup> T2D was defined based on World Health Organization (WHO) 1999 diagnostic criteria  
19  
2031 as fasting plasma glucose  $\geq$ 7.0mmol/l or 2-h plasma glucose  $\geq$ 11.1mmol/l, impaired fasting glucose (IFG)  
21  
22  
2332 was defined as 6.1 mmol/l  $\leq$  FPG  $<$  7.0 mmol/l, and normal condition was defined as FPG  $<$ 6.1 mmol/l.<sup>20</sup>  
24  
25  
2633 The eGFR was calculated using Modification of Diet in Renal Disease (MDRD) formula<sup>21</sup>:  $186 \times [\text{serum}$   
27  
28  
2934 creatinine (mg/ dl)] $^{-1.154} \times (\text{age})^{-0.203} \times [0.742 \text{ (if female)}]$ . According to the Kidney Disease Outcomes  
30  
3135 Quality Initiative (KDOQI) clinical practice guideline, estimated glomerular filtration rate (eGFR)  $<$ 60  
32  
33  
3436 mL/min/1.73 m<sup>2</sup>, proteinuria and hematuria were defined as markers of CKD.<sup>22</sup> Urine proteinuria were  
35  
36  
3737 recorded as negative (-), trace, 1+, 2+ and 3+. Albuminuria was defined as  $\geq$ 1+.

### 38 39 40 41 4239 **Data collection**

43  
44  
4540 The subjects participating in the study attended to the medical center in the morning after overnight  
46  
47  
4841 fasting for at least 12 hours. After 5 minutes resting, sitting blood pressure was measured in right arm by  
49  
5042 a trained medical staff using an electronic blood pressure monitor. The resting BP was measured three  
51  
52  
5343 times with five minutes intervals between them, and then the averages were calculated, which were used  
54  
55  
5644 for further analysis. Blood samples were obtained on their arrival at the medical center and fasting  
57  
5845 glucose (FPG) were measured by the hexokinase method, total cholesterol, low-density  
59  
60

lipoprotein-cholesterol (LDL-C), high-density lipoprotein-cholesterol (HDL-C), triglyceride, blood urea nitrogen (BUN), creatinine, serum uric acid were measured in an automated bio-analyzer (Hitachi, Tokyo, Japan). Midstream urine specimen was collected for urinary analysis by the dipstick method. Urine pH and proteinuria were recorded as categorical data. Laboratory reagents were purchased from Nanjing Jiancheng Bioengineering Institute (Nanjing, China).

After blood and urine sampling, basic characteristics and medical history were collected by medical staff. Anthropometric measurements including height and body weight were obtained according to a standardized protocol. Renal ultrasonography scanning was performed and measured by an experienced radiologist using GE LOGIQ P5 scanner (GE Healthcare, Milwaukee, SUA) who was blinded to the subjects' medical information.

### **Patient and public involvement**

No patient was involved in the design or conduct of the study, but the results of the study will be shared to patients coming for follow-up.

### **Statistical analysis**

We divided the subjects into gender-specific quartiles [males (M): Q1 $\leq$  4.9, Q2: 5.0-5.9, Q3: 6.0-6.9, Q4  $\geq$  7.0 mg/dL; females (F): Q1 $\leq$  3.9, Q2: 4.0-4.9, Q3: 5.0-5.9, Q4  $\geq$  6.0mg/dL] according to serum uric acid level. Distribution of variables was evaluated by the Kolmogorov Smirnov test and homogeneity of variance was assessed by the Levene test. The normal distributed data are reported in means $\pm$ SD. Skewed or non-normal distributed data are presented in medians with inter quartile range (IQR). Categorical variables are showed in percentages. The univariate analysis of variance (ANOVA) was used to analyze

1  
2  
3  
4  
5  
6  
7  
8  
9  
10  
11  
12  
13  
14  
15  
16  
17  
18  
19  
20  
21  
22  
23  
24  
25  
26  
27  
28  
29  
30  
31  
32  
33  
34  
35  
36  
37  
38  
39  
40  
41  
42  
43  
44  
45  
46  
47  
48  
49  
50  
51  
52  
53  
54  
55  
56  
57  
58  
59  
60

the differences among groups' means in case of normal data distribution or after logarithmic normalization in case of skewed data (if appropriate). Kruskal-Wallis test was used to analyze the differences among groups' medians in case of nonparametric data distribution. Differences between groups for proportions were tested with chi-square tests. If the results show differences between the groups, the post-hoc tests would be done. As for the post-hoc test of normally distributed data, we used least significance difference (LSD) test if the variance was homogeneous, and we used Tamhane's T2 test if not. The post-hoc test of non-normally distributed data was compared using Kruskal-Wallis test. As for the post-hoc test of categorical variables, we used chi-square tests. Correlations were Pearson's or Spearman's depending on the distribution of the data. In the present study, SUA, age, BMI, SBP, DBP, FPG, TC, TG, HDL-C, LDL-C, eGFR were normally distributed. Thus, Pearson's correlation was used among these variables. If Pearson's correlation analysis was statistically significant, multiple linear regression analysis was performed to determine the association of SUA with various independent variables. We analyzed the multiple collinearity by calculating the correlation coefficient matrix, tolerance and variance inflation factor of independent variables. Multivariable logistic regression analysis (unadjusted and full-adjusted) was used to calculate the odds ratio for hyperuricemia according to different status of clinical parameters. Furthermore, multivariable logistic regression analysis (multiple adjusted models) was used to examine the association between related diseases and the SUA categories of Q2 or greater compared to the lowest SUA category. The association between hyperuricemia and clustered CVD risk factors had been calculated. Statistical analyses were performed by IBM SPSS statistics version 20.0 (SPSS, Chicago, IL, USA). Statistical significance was set at  $P$ -values of  $<0.05$ .

## RESULTS

### Clinical characteristics of participants in quartiles of serum uric acid level.

A total of 26768 participants with mean age  $48.93 \pm 15.47$  years, and 15041 (56.2%) men and 11727 (43.8%) women completed in the study. The prevalence rates of hyperuricemia of men and women were 22.2 % (95% confidence intervals (CI) 21.5–22.9%) and 10.8% (10.3–11.4%), respectively. Female individuals with higher level of SUA were older than the age of males. With increasing quartiles of SUA, participants had more CVDs risk factors (obesity, hypertension, dyslipidemia) and renal diseases (chronic kidney disease, nephrolithiasis), as well as elevated levels of body mass index, systolic blood pressure, diastolic blood pressure, total cholesterol, triglyceride, low density lipoprotein cholesterol, creatinine, blood urea nitrogen (BUN), and decreased levels of high density lipoprotein cholesterol, estimated glomerular filtration rate in both men and women (Table 1, all *P* values for trend <0.001).

### The prevalence of CVD risk factors, renal diseases in quartiles of serum uric acid level

As demonstrated in Figure 1, there was a significant increase in the prevalence of cardiovascular disease risk factors and renal disorders across SUA quartiles in men and women (all *P* value for trend <0.001). In the male hyperuricemia individuals, the prevalence rates of obesity, hypertension, diabetes mellitus, dyslipidemia, chronic kidney disease and nephrolithiasis were 24.1% (95% CI, 22.6-25.5%), 36.5% (34.9-38.2%), 4.9% (4.2-5.7%), 54.4% (52.7-56.1%), 6.9% (6.1-7.8%) and 18.6% (17.3-19.9%) respectively. In the female hyperuricemia individuals, the prevalence rates of obesity, hypertension, diabetes mellitus, dyslipidemia, chronic kidney disease and nephrolithiasis were 24.0% (21.6-26.3%), 43.2% (40.5-46.0%), 10.2% (8.6-11.9%), 45.5% (42.8-48.3%), 12.8% (11.0-14.7%) and 16.9% (14.8-19.0%) , respectively.



## The correlation between serum uric acid and various clinical parameters

In the present study, SUA, age, BMI, SBP, DBP, FPG, TC, TG, HDL-C, LDL-C, eGFR were normally distributed. Thus, we used Pearson's correlation analysis to investigate the relationships and the results were shown in Table 2. In men, the level of serum uric acid was positively correlated with BMI, SBP, DBP, TC, TG, LDL-C, and negatively correlated with age, FPG, HDL-C and eGFR (all  $P$  values < 0.001). In women, the level of serum uric acid was positively correlated with age, BMI, SBP, DBP, FPG, TC, TG, LDL-C, and negatively correlated with HDL-C and eGFR (all  $P$  values < 0.001).

Multiple linear regression analysis in Table 3 showed that adjusting for various factors, serum uric acid was still positively correlated with BMI, SBP, TC, TG, negatively correlated with age, FPG, HDL-C and eGFR in males (all  $P$  values < 0.001). Serum uric acid was positively correlated with BMI, SBP, TC, TG, negatively correlated with FPG, HDL-C and eGFR in females (all  $P$  values < 0.001, except FPG  $P$  values = 0.003).

## The association between hyperuricemia and the clinical outcome

Multivariable logistic regression models (unadjusted and full-adjusted) were analyzed and the results were shown in Table 4 with the odds ratio (OR) for hyperuricemia according to different clinical outcome. We found that after adjustment for confounders, increased levels of BMI, BP, triglyceride, LDL-C and albuminuria and decreased levels of HDL-C all are positively related to increased odds ratio of hyperuricemia. Renal insufficiency, acid urine, nephrolithiasis also positively correlated with hyperuricemia, however, FPG and alkaline urine negatively correlated with hyperuricemia in both gender

(all  $P$  values<0.05). These results suggested that the individuals with overweight/obesity, hypertension, dyslipidemia, renal insufficiency, massive albuminuria, acid urine, nephrolithiasis were more susceptible to hyperuricemia in both men and women.

### **The relationship between different levels of serum uric acid and CVDs risk factors, renal disorders**

Multivariable logistic regression analysis (multiple adjusted models) was studied and the results were shown in Table 5. The odd ratio for obesity, hypertension, diabetes mellitus, dyslipidemia, chronic kidney disease, nephrolithiasis in the highest SUA quartile was 3.165 (95% CI 2.644-3.790,  $P$  <0.001, model 3), 1.341 (95% CI 1.181-1.524,  $P$  <0.001, model 3), 0.206 (95% CI 0.165-0.257,  $P$  <0.001, model 3), 2.490 (95% CI 2.213–2.801,  $P$  <0.001, model 3), 7.081 (95% CI 4.985-10.058,  $P$  <0.001, model 3), 1.469 (95% CI 1.261–1.710,  $P$  <0.001, model 3) compared with that in the lowest SUA quartile, respectively, in men.

The data in Table 6 were multivariable logistic regression analysis in women and the odd ratio for obesity, hypertension, diabetes mellitus, dyslipidemia, chronic kidney disease, nephrolithiasis in the highest SUA quartile was 3.776 (95% CI 2.969-4.802,  $P$  <0.001, model 3), 1.289 (95% CI 1.076-1.545,  $P$  =0.006, model 3), 0.524 (95% CI 0.384-0.715,  $P$  <0.001, model 3), 3.614 (95% CI 3.058-4.272,  $P$  <0.001, model 3), 11.571 (95% CI 7.267-18.423,  $P$  <0.001, model 3), 1.242 (95% CI 1.009-1.530,  $P$  =0.041, model 3) compared with that in the lowest SUA quartile, respectively.

From multivariable logistic regression analysis in men and women we concluded that hyperuricemia positively correlated with obesity, hypertension, dyslipidemia, chronic kidney disease, nephrolithiasis, but negatively correlated with diabetes mellitus (all  $P$  <0.05) in both gender. Furthermore, females had stronger association between hyperuricemia and chronic kidney disease than males.

### The association between hyperuricemia and clustered CVD risk factors.

Multivariable logistic regression was analyzed for hyperuricemia and clustered CVD risk factors, the results were shown in Table 7. After adjustment for age, compared with the group of zero CVD risk factor reference group, the odd ratio for group of  $\geq 3$  CVD risk factors was 3.889 (95% CI 3.322-4.552,  $P < 0.001$ ), 6.270 (95% CI 4.936-7.964,  $P < 0.001$ ) in men and women, respectively. The individuals with more CVD risk factors were associated with the higher ORs of hyperuricemia both in men and women ( $P$  for trend  $< 0.001$ ). Furthermore, females had a stronger association of hyperuricemia with clustered CVD risk factors than males.

### DISCUSSION

In the present study, we found that increasing prevalence of CVD risk factors and renal disorders was predominantly associated with increased SUA levels in Shanghai population. According to our multi-center epidemiologic study of 26768 subjects, the prevalence of hyperuricemia in Shanghai was 17.2% (95%CI 16.8%-17.7%), 22.2% (21.5–22.9%) in men and 10.8% (10.3–11.4%) in women. This is higher than the prevalence of hyperuricemia among nationwide Chinese adults between year 2009 and 2010 (8.4%),<sup>23</sup> and close to the developed countries, such as United States (21.4 %) and Japan (25.8 %).<sup>24 25</sup> Along with the rapid economic development of Shanghai, the consumption of purine-rich food and alcohol is increasing. Meanwhile, obesity and aging population is rising. The change of lifestyle, dietary habit and population attributed to this phenomenon. The gender-related differences between serum uric acid level and age could be resulted from sex hormones. Estrogen promoted urinary uric acid excretion.<sup>26</sup>

1  
2  
3  
4273 Obesity is probably the major risk factor for CVD. Obesity accompanied by increased waist  
5  
6  
7274 circumference, hyperinsulinemia and dyslipidemia. The most frequent manifestation of glucose  
8  
9  
10275 metabolism in obese population is hyperinsulinemia, a compensatory mechanism, whereas fasting  
11  
1276 glucose remains normal.<sup>27</sup> It is likely that the presence of insulin resistance and hyperinsulinemia  
13  
14  
1577 facilitates renal tubular cells to reabsorb sodium coupling with urate.<sup>28</sup> This may be the reason why  
16  
17  
1878 obesity is accompanied by hyperuricemia. And our data are also in agreement with the result from two  
19  
20  
2179 retrospective studies in youths.<sup>29 30</sup>

22  
2380 Hypertension is another important risk factor for CVD. Recently, Borghi C et al. found that SUA  
24  
25  
2681 levels were significantly higher in untreated and poorly controlled hypertensive patients in comparison to  
27  
28  
2982 normotensive controls and well-controlled hypertensive patients.<sup>31-33</sup> Our data were in accordance with  
30  
3183 Borghi C's results. After adjustment of confounding factors, hypertension was still significantly  
32  
33  
3484 associated with hyperuricemia. The odd ratio for hypertension in the highest SUA quartile was 1.341  
35  
36  
3785 (95% CI 1.181-1.524,  $P < 0.001$ ) in men, 1.289 (95% CI 1.076-1.545,  $P = 0.006$ ) in women. Future  
38  
39  
4086 follow-up studies and randomized clinical trials are required for investigating the causative relationships  
41  
4287 between urate and blood pressure. However, animal studies had showed that high level of uric acid  
43  
44  
4588 caused high blood pressure, which was mediated by activation of renal and systemic  
46  
47  
4889 renin-angiotensin-aldosterone systems (RAAS), oxidative stress, vascular insulin resistance and loss of  
49  
5090 endothelial nitric oxide.<sup>34 35</sup>

51  
52  
5391 One of the interesting findings in our investigation was that the higher level of SUA was positively  
54  
55  
5692 correlated with the higher prevalence rates of diabetes mellitus in women, but inversely correlated with  
57  
5893 that in men (Figure 1). The Pearson's correlation analysis demonstrated that the level of SUA positively  
59  
60

1  
2  
3  
4294 correlated with fasting plasma glucose in women, but negatively in men. However, the coefficients of  
5  
6  
7295 determination of the models were low. The obtained  $P$  values below 0.001 may attributed to the effect of  
8  
9  
10296 the big sample size. So we further adopted multiple linear regression and multivariable logistic regression  
11  
12297 analysis for association of various variable with serum uric acid. After adjustment of confounding factors,  
13  
14  
15298 results of multivariable logistic regression showed that inverse association of serum uric acid with  
16  
17  
18299 diabetes mellitus in both men and women. The odd ratio for diabetes mellitus in the highest SUA quartile  
19  
20300 was 0.206 (95% CI 0.165–0.257,  $P < 0.001$ ) in men, 0.524 (95% CI 0.384–0.715,  $P < 0.001$ ) in women.  
21  
22  
23301 This also confirmed by multiple linear regression analysis. We speculated that this phenomenon is  
24  
25  
26302 probably due to the presence of high level of blood glucose which promotes renal excretion of serum uric  
27  
28  
29303 acid. It has been indicated that hyperglycaemia worsens the function of beta cells and deteriorates  
30  
31304 glycemic control, which gradually elevates the rate of renal glomerular filtration.<sup>36</sup> The hyperfiltration  
32  
33  
34305 due to multiple kidney disorders will lead to increased excretion of uric acid, and will be more susceptible  
35  
36  
37306 to diabetic nephropathy with decreasing eGFR.<sup>37</sup>

38  
39307 Based on our data, hyperuricemia had a remarkable association with cardiovascular disease risk  
40  
41  
42308 factors and renal disorders. The more CVD risk factors individuals had, the higher ORs of hyperuricemia  
43  
44  
45309 were observed in both genders, especially in women. This was consistent with Borghi C's studies that  
46  
47  
48310 SUA were associated with cardiovascular risk score, and the results supported an independent association  
49  
50  
51311 between SUA and cardiovascular disease.<sup>3 38</sup> There were numerous mechanisms involved in the close  
52  
53312 association between serum uric acid and CVDs.<sup>39-42</sup> Uric acid stimulates platelet-derived growth factor  
54  
55  
56313 receptor $\beta$  (PDGFR $\beta$ ) phosphorylation, leading to vascular smooth muscle cell (VSMC) proliferation.<sup>39</sup>  
57  
58314 Uric acid increases oxidative stress and stimulates the activation of renin-angiotensin system, resulting in  
59  
60

1  
2  
3  
4315 the senescence and apoptosis of human umbilical vein endothelial cells (HUVECs).<sup>40</sup> Uric acid also can  
5  
6  
7316 cause mitochondrial alterations and decreased intracellular ATP production and subsequently result in  
8  
9  
10317 endothelial dysfunction in human aortic endothelial cells (HAECs).<sup>41</sup> A large quantity of animal  
11  
1218 experiments and human epidemiological documents indicated that SUA-lowering treatment was beneficial  
13  
14  
1319 for cardiovascular diseases.<sup>43-47</sup>

17  
1820 On the other hand, the related mechanisms in the link between hyperuricemia and chronic kidney  
19  
20321 disease (CKD) were not well investigated. It was demonstrated that 70% of urate eliminated occurs in the  
21  
22  
2322 kidneys, and decreased eGFR would result in elevated levels of SUA.<sup>48</sup> However, uric acid could induce  
24  
25  
2623 oxidative stress, trigger activation of RAAS and inflammation, cause endothelial dysfunction, and thus  
27  
28  
29324 subsequently lead to decline of eGFR.<sup>35 49 50</sup> The persistent high level of SUA predicts the high risk of  
30  
31325 developing CKD.<sup>51</sup> There was a marked association of SUA with albuminuria in patients with renal  
32  
33  
3426 insufficiency.<sup>52</sup> Our study were in consistent with many prospective studies,<sup>14 53 54</sup> showing that SUA is a  
35  
36  
3727 significant risk factor for CKD and proteinuria, which is independent of confounders of CRFs. We further  
38  
39328 demonstrated that hyperuricemia significantly correlated with acid urine and nephrolithiasis, which was  
40  
41  
4229 confirmed by the prevalence rates of chronic kidney disease and nephrolithiasis across the SUA levels.  
43  
44

4530 This study has some limitations that need to be mentioned. First, it was a cross-section study and the  
46  
47  
48331 results could not establish causative relationships between hyperuricemia and CRFs clustering and renal  
49  
50332 diseases. Future follow-up studies are required for more accurate evaluation of these relationships.  
51  
52  
5333 Second, the data were from three medical centers' databases that lacked details in waist circumference,  
54  
55  
56334 HOMA-IR, smoking, drinking, lifestyles, diet and pharmacotherapy, which might affect the deviations of  
57  
58335 some clinical outcomes. Nonetheless, the strengths of our study included its strict exclusion criteria based  
59  
60

1  
2  
3  
4336 on medical histories and laboratory findings. And we conducted a multi-center study with large sample  
5  
6  
7337 size which ensured sufficient parameters and accurate results. The relationship was analyzed in both  
8  
9  
10338 sexes and a solid conclusion about the differences between men and women was gained.

## 1340 CONCLUSION

17  
1841 In summary, our data demonstrated that the increasing prevalent rate of CRFs and renal disorders  
19  
20  
21342 were significantly correlated with the elevated level of serum uric acid. Hyperuricemia was remarkably  
22  
2343 linked with CVD-related risk factors and kidney disease, especially in females.

28  
2945 **Acknowledgements** The authors appreciate all the participants and their families. They also thank the  
30  
3146 members of the study team from Shanghai East Hospital Affiliated to Tongji University School of  
32  
33  
3447 Medicine, Pudong New District Gongli Hospital and Baoshan Branch of Shanghai First People's Hospital  
35  
36  
3748 for their assistance in completing this project.

39  
4049 **Author Contributions** M.T., N.L., S.Z., Y.S. and Y.Z. performed the statistical analysis and wrote the  
41  
4250 manuscript; M.T., X.M., X.P., Y.C., H.G. and Y.S. participated in the data collection; M.T., N.L., S.Z.  
43  
44  
4551 and Y.Z. contributed to discussion; M.T., and N.L. participated in the design of the study and edited the  
46  
47  
4852 manuscript. All authors have read and approved the final manuscript. The corresponding author had full  
49  
50  
5153 access to all the data in the study and had final responsibility for the decision to submit for publication.

## 5555 Funding

57  
5856 This study was also supported by the National Nature Science Foundation of China grants (81670690,  
59  
6057 81470991 and 81200492 to N.L., 81830021, 81670623, 81470920 and 81270778 to S.Z.), the Key

1  
2  
3  
4 358 Discipline Construction Project of Pudong Health Bureau of Shanghai (PWZxk2017-05 to N.L.), the  
5  
6 359 Branch grant of National key grants of Ministry of Science and Technology (2018YFA0108802 to S.Z.),  
7  
8 360 US National Institutes of Health (2R01DK08506505A1 to S.Z.), the Shanghai Scientific Committee of  
9  
10 361 China (13PJ1406900 to N.L.), Shanghai Health Bureau grant (20134464 to X.P.).  
11  
12 362  
13

14 363 **Competing interests** None declared.  
15  
16

17 364 **Patient consent** Obtained.  
18  
19

### 20 365 **Ethics approval and consent to participate**

21  
22 366 This study was approved by the Human Research Ethics Committee of Shanghai East Hospital Affiliated  
23  
24  
25 367 to Tongji University School of Medicine, the Human Research Ethics Committee of Pudong New District  
26  
27  
28 368 Gongli Hospital and the Human Research Ethics Committee of Baoshan Branch of Shanghai First  
29  
30  
31 369 People's Hospital. All methods were performed in compliance with Good Clinical Practice (GCP)  
32  
33 370 guidelines and the Declaration of Helsinki. Written informed consent was obtained from each participant  
34  
35  
36 371 before data collection.  
37  
38

39 372 **Provenance and peer review** Not commissioned; externally peer reviewed.  
40  
41

42 373 **Data sharing statement** The data sets generated and analysed during the current study are available  
43  
44 374 from the corresponding author upon reasonable request.  
45  
46

47 375 **Open Access** This is an Open Access article distributed in accordance with the Creative Commons  
48  
49  
50 376 Attribution Non Commercial (CC BY-NC 4.0) license, which permits others to distribute, remix, adapt,  
51  
52 377 build upon this work non-commercially, and license their derivative works on different terms, provided  
53  
54  
55 378 the original work is properly cited and the use is non-commercial.  
56

57  
58 379 See: <http://creativecommons.org/licenses/by-nc/4.0/>  
59  
60



1  
2  
3  
4380 © Article author(s) (or their employer(s) unless otherwise stated in the text of the article) 2018. All rights  
5  
6 reserved. No commercial use is permitted unless otherwise expressly granted.  
7381  
8

9  
10  
11  
1283 **REFERENCES**

- 13  
1384 1. Jalal DI. Hyperuricemia, the kidneys, and the spectrum of associated diseases: a narrative review. *Curr*  
15  
1385 *Med Res Opin* 2016;32:1863-69.  
17  
1386 2. Kanbay M, Jensen T, Solak Y, et al. Uric acid in metabolic syndrome: From an innocent bystander to a  
19  
2087 central player. *Eur J Intern Med* 2016;29:3-8.  
21  
2388 3. Borghi C, Rosei EA, Bardin T, et al. Serum uric acid and the risk of cardiovascular and renal disease. *J*  
23  
2389 *Hypertens* 2015;33:1729-41.  
25  
2590 4. Kuwabara M, Bjornstad P, Hisatome I, et al. Elevated Serum Uric Acid Level Predicts Rapid Decline  
27  
2591 in Kidney Function. *Am J Nephrol* 2017;45:330-37.  
29  
3092 5. Gertler MM, Garn SM, Levine SA. Serum uric acid in relation to age and physique in health and in  
31  
3293 coronary heart disease. *Ann Intern Med* 1951;34:1421-31.  
33  
3494 6. Wang TT, Lin B, Cui WX, et al. Clustering of Cardiovascular Risk Factors and Diabetes: A  
35  
3695 Prospective Cohort Study on the Inner Mongolian Population in China. *Biomed Environ Sci*  
37  
3896 2018;31:749-56.  
39  
4097 7. de Souza Filho ZA, Ferreira AA, Dos Santos J, et al. Cardiovascular risk factors with an emphasis on  
41  
4298 hypertension in the Mura Indians from Amazonia. *BMC Public Health* 2018;18:1251.  
43  
4499 8. Matthews KA, Jennings JR, Lee L, et al. Depressive symptoms during childhood and cardiovascular  
45  
4600 risk factors in black and white men. *Psychosom Med* 2018.  
47  
4801 9. van Sloten TT, Tafflet M, Perier MC, et al. Association of Change in Cardiovascular Risk Factors With  
49  
5002 Incident Cardiovascular Events. *Jama* 2018;320:1793-804.  
51  
5203 10. Lipkowitz MS. Regulation of uric acid excretion by the kidney. *Curr Rheumatol Rep* 2012;14:179-88.  
53  
5404 11. DiBianco JM, Jarrett TW, Mufarrij P. Metabolic Syndrome and Nephrolithiasis Risk: Should the  
55  
5605 Medical Management of Nephrolithiasis Include the Treatment of Metabolic Syndrome? *Rev Urol*  
57  
5806 2015;17:117-28.  
59  
60

- 1  
2  
3  
4  
5  
6  
7  
8  
9  
10  
11  
12  
13  
14  
15  
16  
17  
18  
19  
20  
21  
22  
23  
24  
25  
26  
27  
28  
29  
30  
31  
32  
33  
34  
35  
36  
37  
38  
39  
40  
41  
42  
43  
44  
45  
46  
47  
48  
49  
50  
51  
52  
53  
54  
55  
56  
57  
58  
59  
60
12. Jalal DI, Rivard CJ, Johnson RJ, et al. Serum uric acid levels predict the development of albuminuria over 6 years in patients with type 1 diabetes: findings from the Coronary Artery Calcification in Type 1 Diabetes study. *Nephrol Dial Transplant* 2010;25:1865-9.
  13. Klisic A, Kocic G, Kavacic N, et al. Xanthine oxidase and uric acid as independent predictors of albuminuria in patients with diabetes mellitus type 2. *Clin Exp Med* 2018;18:283-90.
  14. Bellomo G, Venanzi S, Verdura C, et al. Association of uric acid with change in kidney function in healthy normotensive individuals. *Am J Kidney Dis* 2010;56:264-72.
  15. Mwasongwe SE, Fulop T, Katz R, et al. Relation of uric acid level to rapid kidney function decline and development of kidney disease: The Jackson Heart Study. *J Clin Hypertens (Greenwich)* 2018;20:775-83.
  16. Becker MA, Schumacher HR, Jr., Wortmann RL, et al. Febuxostat compared with allopurinol in patients with hyperuricemia and gout. *N Engl J Med* 2005;353:2450-61.
  17. Appropriate body-mass index for Asian populations and its implications for policy and intervention strategies. *Lancet* 2004;363:157-63.
  18. National High Blood Pressure Education P. The Seventh Report of the Joint National Committee on Prevention, Detection, Evaluation, and Treatment of High Blood Pressure. Bethesda (MD): National Heart, Lung, and Blood Institute (US), 2004.
  19. [Chinese guidelines on prevention and treatment of dyslipidemia in adults]. *Zhonghua Xin Xue Guan Bing Za Zhi* 2007;35:390-419.
  20. Alberti KG, Zimmet PZ. Definition, diagnosis and classification of diabetes mellitus and its complications. Part 1: diagnosis and classification of diabetes mellitus provisional report of a WHO consultation. *Diabet Med* 1998;15:539-53.
  21. Levey AS, Bosch JP, Lewis JB, et al. A more accurate method to estimate glomerular filtration rate from serum creatinine: a new prediction equation. Modification of Diet in Renal Disease Study Group. *Ann Intern Med* 1999;130:461-70.
  22. K/DOQI clinical practice guidelines for chronic kidney disease: evaluation, classification, and stratification. *Am J Kidney Dis* 2002;39:S1-266.

- 1  
2  
3  
4 434 23. Liu H, Zhang XM, Wang YL, et al. Prevalence of hyperuricemia among Chinese adults: a national  
5 cross-sectional survey using multistage, stratified sampling. *J Nephrol* 2014;27:653-8.  
6 435  
7  
8 436 24. Zhu Y, Pandya BJ, Choi HK. Prevalence of gout and hyperuricemia in the US general population: the  
9 National Health and Nutrition Examination Survey 2007-2008. *Arthritis Rheum* 2011;63:3136-41.  
10 437  
11  
12 438 25. Nagahama K, Iseki K, Inoue T, et al. Hyperuricemia and cardiovascular risk factor clustering in a  
13 screened cohort in Okinawa, Japan. *Hypertens Res* 2004;27:227-33.  
14 439  
15  
16 440 26. Sekine T, Miyazaki H, Endou H. Molecular physiology of renal organic anion transporters. *Am J*  
17 *Physiol Renal Physiol* 2006;290:F251-61.  
18 441  
19  
20 442 27. Yoo TW, Sung KC, Shin HS, et al. Relationship between serum uric acid concentration and insulin  
21 resistance and metabolic syndrome. *Circ J* 2005;69:928-33.  
22 443  
23  
24 444 28. Bjornstad P, Lanasa MA, Ishimoto T, et al. Fructose and uric acid in diabetic nephropathy.  
25 *Diabetologia* 2015;58:1993-2002.  
26 445  
27  
28 446 29. Lurbe E, Torro MI, Alvarez-Pitti J, et al. Uric acid is linked to cardiometabolic risk factors in  
29 overweight and obese youths. *J Hypertens* 2018;36:1840-46.  
30 447  
31  
32 448 30. Ishiro M, Takaya R, Mori Y, et al. Association of uric acid with obesity and endothelial dysfunction  
33 in children and early adolescents. *Ann Nutr Metab* 2013;62:169-76.  
34 449  
35  
36 450 31. Cicero AF, Rosticci M, Fogacci F, et al. High serum uric acid is associated to poorly controlled blood  
37 pressure and higher arterial stiffness in hypertensive subjects. *Eur J Intern Med* 2017;37:38-42.  
38 451  
39  
40 452 32. Mancia G, Grassi G, Borghi C. Hyperuricemia, urate deposition and the association with hypertension.  
41 *Curr Med Res Opin* 2015;31 Suppl 2:15-9.  
42 453  
43  
44 454 33. Cicero AF, Salvi P, D'Addato S, et al. Association between serum uric acid, hypertension, vascular  
45 stiffness and subclinical atherosclerosis: data from the Brisighella Heart Study. *J Hypertens*  
46 455 2014;32:57-64.  
47 456  
48  
49 457 34. Choi YJ, Yoon Y, Lee KY, et al. Uric acid induces endothelial dysfunction by vascular insulin  
50 resistance associated with the impairment of nitric oxide synthesis. *Faseb j* 2014;28:3197-204.  
51 458  
52  
53 459 35. Corry DB, Eslami P, Yamamoto K, et al. Uric acid stimulates vascular smooth muscle cell  
54 proliferation and oxidative stress via the vascular renin-angiotensin system. *J Hypertens*  
55 460 2008;26:269-75.  
56 461  
57  
58  
59  
60

- 1  
2  
3  
462 36. Li Q, Yang Z, Lu B, et al. Serum uric acid level and its association with metabolic syndrome and  
5  
6463 carotid atherosclerosis in patients with type 2 diabetes. *Cardiovasc Diabetol* 2011;10:72.  
7  
8464 37. Lytvyn Y, Skrtic M, Yang GK, et al. Glycosuria-mediated urinary uric acid excretion in patients with  
9  
1065 uncomplicated type 1 diabetes mellitus. *Am J Physiol Renal Physiol* 2015;308:F77-83.  
11  
1266 38. Borghi C, Rodriguez-Artalejo F, De Backer G, et al. Serum uric acid levels are associated with  
13  
1467 cardiovascular risk score: A post hoc analysis of the EURIKA study. *Int J Cardiol* 2018;253:167-73.  
15  
1468 39. Kirca M, Oguz N, Cetin A, et al. Uric acid stimulates proliferative pathways in vascular smooth  
17  
1469 muscle cells through the activation of p38 MAPK, p44/42 MAPK and PDGFRbeta. *J Recept Signal*  
19  
2070 *Transduct Res* 2017;37:167-73.  
21  
2271 40. Yu MA, Sanchez-Lozada LG, Johnson RJ, et al. Oxidative stress with an activation of the  
23  
2472 renin-angiotensin system in human vascular endothelial cells as a novel mechanism of uric  
25  
2473 acid-induced endothelial dysfunction. *J Hypertens* 2010;28:1234-42.  
27  
2474 41. Sanchez-Lozada LG, Lanaspá MA, Cristobal-Garcia M, et al. Uric acid-induced endothelial  
29  
3075 dysfunction is associated with mitochondrial alterations and decreased intracellular ATP  
31  
3276 concentrations. *Nephron Exp Nephrol* 2012;121:e71-8.  
33  
3477 42. Strazzullo P, Puig JG. Uric acid and oxidative stress: relative impact on cardiovascular risk? *Nutr*  
35  
3678 *Metab Cardiovasc Dis* 2007;17:409-14.  
37  
3879 43. Kondo M, Imanishi M, Fukushima K, et al. Xanthine Oxidase Inhibition by Febuxostat in  
39  
4080 Macrophages Suppresses Angiotensin II-induced Aortic Fibrosis. *Am J Hypertens* 2018.  
41  
4281 44. Namai-Takahashi A, Sakuyama A, Nakamura T, et al. Xanthine oxidase inhibitor, febuxostat  
43  
4482 ameliorates the high salt intake-induced cardiac hypertrophy and fibrosis in Dahl salt-sensitive rats.  
45  
4683 *Am J Hypertens* 2018.  
47  
4884 45. MacIsaac RL, Salatzki J, Higgins P, et al. Allopurinol and Cardiovascular Outcomes in Adults With  
49  
5085 Hypertension. *Hypertension* 2016;67:535-40.  
51  
5286 46. Tani S, Nagao K, Hirayama A. Effect of Febuxostat, a Xanthine Oxidase Inhibitor, on Cardiovascular  
53  
5487 Risk in Hyperuricemic Patients with Hypertension: A Prospective, Open-label, Pilot Study. *Clin Drug*  
55  
5688 *Investig* 2015;35:823-31.  
58  
59  
60

- 1  
2  
3  
489 47. Xin W, Mi S, Lin Z. Allopurinol therapy improves vascular endothelial function in subjects at risk for  
5  
6490 cardiovascular diseases: a meta-analysis of randomized controlled trials. *Cardiovasc Ther*  
7  
8491 2016;34:441-49.  
9  
10492 48. Marangella M. Uric acid elimination in the urine. Pathophysiological implications. *Contrib Nephrol*  
11  
12493 2005;147:132-48.  
13  
1494 49. Bao J, Shi Y, Tao M, et al. Pharmacological inhibition of autophagy by 3-MA attenuates  
15  
16495 hyperuricemic nephropathy. *Clin Sci (Lond)* 2018;132:2299-322.  
17  
18496 50. Maruhashi T, Hisatome I, Kihara Y, et al. Hyperuricemia and endothelial function: From molecular  
19  
20497 background to clinical perspectives. *Atherosclerosis* 2018;278:226-31.  
21  
22498 51. Chou YC, Kuan JC, Yang T, et al. Elevated uric acid level as a significant predictor of chronic kidney  
23  
24499 disease: a cohort study with repeated measurements. *J Nephrol* 2015;28:457-62.  
25  
26500 52. De Cosmo S, Viazzi F, Pacilli A, et al. Serum Uric Acid and Risk of CKD in Type 2 Diabetes. *Clin J*  
27  
28501 *Am Soc Nephrol* 2015;10:1921-9.  
29  
30502 53. Takae K, Nagata M, Hata J, et al. Serum Uric Acid as a Risk Factor for Chronic Kidney Disease in a  
31  
32503 Japanese Community- The Hisayama Study. *Circ J* 2016;80:1857-62.  
33  
34504 54. Li L, Yang C, Zhao Y, et al. Is hyperuricemia an independent risk factor for new-onset chronic kidney  
35  
36505 disease?: A systematic review and meta-analysis based on observational cohort studies. *BMC Nephrol*  
37  
38506 2014;15:122.  
39  
40  
41  
42  
43  
44  
45  
46  
47  
48  
49  
50  
51  
52  
53  
54  
55  
56  
57  
58  
59  
60

1  
2  
3  
4 517 **Figure legend**

5  
6 518 Figure 1. Prevalence of major CVD risk factors, renal diseases in different levels of serum uric acid.

7  
8  
9 519 Prevalence of obesity(A), hypertension(B), diabetes mellitus(C), dyslipidemia(D), chronic kidney disease

10  
11  
12 520 (E) and nephrolithiasis(F) in different levels of serum uric acid. The gender-specific quartiles of uric acid

13  
14 521 (mg/dL), Q1: males (M)  $\leq 4.9$ , females (F)  $\leq 3.9$ ; Q2: M 5.0-5.9, F 4.0-4.9; Q3: M 6.0-6.9, F 5.0-5.9; Q4:

15  
16  
17 522  $M \geq 7.0$ ,  $F \geq 6.0$ .

18  
19 523  
20  
21 524  
22  
23 525  
24  
25 526  
26  
27 527  
28  
29 528  
30  
31 529  
32  
33 530  
34  
35 531  
36  
37 532  
38  
39 533  
40  
41 534  
42  
43 535  
44  
45 536  
46  
47 537  
48  
49 538  
50  
51 539  
52  
53 540  
54  
55 541  
56  
57 542  
58  
59 543  
60

For peer review only

**Table 1.** Clinical characteristics of participants in quartiles of serum uric acid level.

|                                     | Men (n=15041)   |                    |                    |                 |                      | Women (n=11727) |                    |                    |                 |                      |
|-------------------------------------|-----------------|--------------------|--------------------|-----------------|----------------------|-----------------|--------------------|--------------------|-----------------|----------------------|
|                                     | Q1<br>≤4.9mg/dl | Q2<br>5.0-5.9mg/dl | Q3<br>6.0-6.9mg/dl | Q4<br>≥7.0mg/dl | P-value<br>for trend | Q1<br>≤3.9mg/dl | Q2<br>4.0-4.9mg/dl | Q3<br>5.0-5.9mg/dl | Q4<br>≥6.0mg/dl | P-value<br>for trend |
| N(%)                                | 2924(19.4%)     | 4617(30.7%)        | 4160(27.7%)        | 3340(22.2%)     | -                    | 3346(28.5%)     | 4509(38.4%)        | 2600(22.2%)        | 1272(10.8%)     | -                    |
| Comorbidities                       |                 |                    |                    |                 |                      |                 |                    |                    |                 |                      |
| Obesity (n, %)                      | 192(6.6%)       | 446(9.7%)***       | 615(14.8%)***      | 804(24.1%)***   | < 0.001              | 133(4.0%)       | 363(8.1%)***       | 380(14.6%)***      | 305(24.0%)***   | < 0.001              |
| Hypertension (n, %)                 | 809(27.7%)      | 1215(26.3%)        | 1288(31.0%)**      | 1220(36.5%)***  | < 0.001              | 554(16.6%)      | 1013(22.5%)***     | 785(30.2%)***      | 550(43.2%)***   | < 0.001              |
| Diabetes mellitus (n, %)            | 348(11.9%)      | 301(6.5%)***       | 222(5.3%)***       | 165(4.9%)***    | < 0.001              | 125(3.7%)       | 170(3.8%)          | 153(5.9%)***       | 130(10.2%)***   | < 0.001              |
| Dyslipidemia (n, %)                 | 735(25.1%)      | 1535(33.2%)***     | 1706(41.0%)***     | 1816(54.4%)***  | < 0.001              | 394(11.8%)      | 861(19.1%)***      | 769(29.6%)***      | 579(45.5%)***   | < 0.001              |
| Chronic kidney disease (n, %)       | 47(1.6%)        | 114(2.5%)*         | 136(3.3%)***       | 232(6.9%)***    | < 0.001              | 25(0.7%)        | 78(1.7%)***        | 105(4.0%)***       | 163(12.8%)***   | < 0.001              |
| Nephrolithiasis (n, %)              | 384(13.1%)      | 703(15.2%)*        | 642(15.4%)**       | 621(18.6%)***   | < 0.001              | 368(11.0%)      | 484(10.7%)         | 367(14.1%)***      | 215(16.9%)***   | < 0.001              |
| Biochemical variables               |                 |                    |                    |                 |                      |                 |                    |                    |                 |                      |
| Age                                 | 50.06±15.49     | 48.05±15.59***     | 47.33±15.58***     | 47.34±15.74***  | < 0.001              | 46.81±14.02     | 48.88±14.89***     | 52.23±15.43***     | 57.86±15.28***  | < 0.001              |
| BMI (kg/m <sup>2</sup> )            | 23.29±3.06      | 24.11±3.08***      | 24.83±3.13***      | 25.98±3.26***   | < 0.001              | 22.15±3.00      | 23.12±3.31***      | 24.34±3.54***      | 25.66±3.96***   | < 0.001              |
| SBP (mmHg)                          | 126.60±18.21    | 126.31±17.54       | 128.12±17.92***    | 130.44±18.29*** | < 0.001              | 120.32±18.24    | 123.59±19.23***    | 128.63±20.49***    | 135.29±21.14*** | < 0.001              |
| DBP (mmHg)                          | 78.98±11.55     | 78.78±11.21        | 80.58±11.44***     | 81.85±11.95***  | < 0.001              | 73.26±10.52     | 75.14±10.92***     | 77.38±11.22***     | 79.17±10.95***  | < 0.001              |
| FPG (mmol/L)                        | 5.65±1.87       | 5.36±1.34***       | 5.33±1.21***       | 5.34±1.07***    | < 0.001              | 5.08±1.22       | 5.13±1.13          | 5.30±1.22***       | 5.58±1.30***    | < 0.001              |
| TC (mmol/L)                         | 4.52±0.88       | 4.58±0.86**        | 4.71±0.89***       | 4.87±0.91***    | < 0.001              | 4.64±0.91       | 4.82±0.93***       | 5.00±0.94***       | 5.17±1.03***    | < 0.001              |
| TG (mmol/L)                         | 1.28±1.27       | 1.45±1.15***       | 1.73±1.47***       | 2.15±1.72***    | < 0.001              | 0.97±0.59       | 1.19±0.77***       | 1.47±0.99***       | 1.97±1.63***    | < 0.001              |
| HDL-C (mmol/L)                      | 1.32±0.31       | 1.25±0.28***       | 1.22±0.28***       | 1.17±0.26***    | < 0.001              | 1.59±0.35       | 1.50±0.34***       | 1.41±0.32***       | 1.32±0.31***    | < 0.001              |
| LDL-C (mmol/L)                      | 2.77±0.76       | 2.88±0.76***       | 2.95±0.77***       | 3.04±0.82***    | < 0.001              | 2.71±0.77       | 2.90±0.79***       | 3.07±0.82***       | 3.12±0.85***    | < 0.001              |
| eGFR (ml/(min*1.73m <sup>2</sup> )) | 92.47±20.66     | 89.39±19.32***     | 87.66±19.50***     | 84.86±20.13***  | < 0.001              | 100.15±23.04    | 97.08±23.93***     | 93.09±24.03***     | 85.59±25.04***  | < 0.001              |
| Cr (umol / L)                       | 80.89±18.37     | 83.62±14.63***     | 85.43±14.69***     | 88.96±22.80***  | < 0.001              | 62.18±10.80     | 63.82±12.04***     | 65.72±13.29***     | 71.24±28.89***  | < 0.001              |
| BUN (mmol/L)                        | 5.19±1.31       | 5.26±1.22*         | 5.31±1.24***       | 5.44±1.57***    | < 0.001              | 4.57±1.20       | 4.84±1.23***       | 5.11±1.27***       | 5.54±1.77***    | < 0.001              |

The continuous variables are reported in means±SD and categorical variables are presented in percentages. In case of nonparametric data distribution medians with inter quartile range (IQR) are presented. Abbreviations: BMI: body mass index, SBP: systolic blood pressure, DBP: diastolic blood pressure, FPG: fasting plasma glucose, TC: total cholesterol, TG: triglyceride, HDL-C: high density lipoprotein cholesterol, LDL-C: low density lipoprotein cholesterol, eGFR: estimated glomerular filtration rate. Cr: creatinine, BUN: blood urea nitrogen. \*P < 0.05, \*\*P < 0.01, \*\*\*P < 0.001 vs. the group of Q1. As for the post-hoc test of normally distributed data, we used least significance difference (LSD) test if the variance was homogeneous, and we used Tamhane's T2 test if not. Non-normally distributed data was compared using Kruskal-Wallis test. As for the post-hoc test of categorical variables, we used chi-square tests.

**Table 2.** Correlation coefficients between serum uric acid and various parameters.

| Variable                            | Men    |         | Women  |         | Total  |         |
|-------------------------------------|--------|---------|--------|---------|--------|---------|
|                                     | r      | P-value | r      | P-value | r      | P-value |
| Age                                 | -0.059 | < 0.001 | 0.226  | < 0.001 | 0.014  | 0.025   |
| BMI (kg/m <sup>2</sup> )            | 0.291  | < 0.001 | 0.326  | < 0.001 | 0.344  | < 0.001 |
| SBP (mmHg)                          | 0.080  | < 0.001 | 0.237  | < 0.001 | 0.161  | < 0.001 |
| DBP (mmHg)                          | 0.097  | < 0.001 | 0.174  | < 0.001 | 0.204  | < 0.001 |
| FPG (mmol/L)                        | -0.071 | < 0.001 | 0.125  | < 0.001 | 0.040  | < 0.001 |
| TC (mmol/L)                         | 0.148  | < 0.001 | 0.186  | < 0.001 | 0.091  | < 0.001 |
| TG (mmol/L)                         | 0.222  | < 0.001 | 0.325  | < 0.001 | 0.290  | < 0.001 |
| HDL-C (mmol/L)                      | -0.177 | < 0.001 | -0.260 | < 0.001 | -0.356 | < 0.001 |
| LDL-C (mmol/L)                      | 0.119  | < 0.001 | 0.181  | < 0.001 | 0.126  | < 0.001 |
| eGFR (ml/(min*1.73m <sup>2</sup> )) | -0.140 | < 0.001 | -0.192 | < 0.001 | -0.219 | < 0.001 |

Abbreviations: BMI: body mass index, SBP: systolic blood pressure, DBP: diastolic blood pressure, FPG: fasting plasma glucose, TC: total cholesterol, TG: triglyceride, HDL-C: high density lipoprotein cholesterol, LDL-C: low density lipoprotein cholesterol, eGFR: estimated glomerular filtration rate.



**Table 3.** Multiple linear regression analysis for association of various independent variable with serum uric acid (dependent variable)

| Variable                            | Men         |                 | Women       |                 | Total       |                 |
|-------------------------------------|-------------|-----------------|-------------|-----------------|-------------|-----------------|
|                                     | <i>St B</i> | <i>P</i> -value | <i>St B</i> | <i>P</i> -value | <i>St B</i> | <i>P</i> -value |
| Age                                 | -0.127      | < 0.001         |             |                 | -0.142      | < 0.001         |
| BMI (kg/m <sup>2</sup> )            | 0.215       | < 0.001         | 0.188       | < 0.001         | 0.195       | < 0.001         |
| SBP (mmHg)                          | 0.066       | < 0.001         | 0.059       | < 0.001         | 0.092       | < 0.001         |
| FPG (mmol/L)                        | -0.122      | < 0.001         | -0.027      | 0.003           | -0.059      | < 0.001         |
| TC (mmol/L)                         | 0.101       | < 0.001         | 0.110       | < 0.001         | 0.089       | < 0.001         |
| TG (mmol/L)                         | 0.114       | < 0.001         | 0.147       | < 0.001         | 0.108       | < 0.001         |
| HDL-C (mmol/L)                      | -0.084      | < 0.001         | -0.168      | < 0.001         | -0.252      | < 0.001         |
| eGFR (ml/(min*1.73m <sup>2</sup> )) | -0.154      | < 0.001         | -0.145      | < 0.001         | -0.208      | < 0.001         |

Multicollinearity analysis showed that SBP and DBP highly correlate with each other, so do TC and LDL-C. And backward elimination was adopted for multiple linear regression to identify independent variables which have most impact on dependent variables. Finally, Independent variables DBP and LDL-C were removed in male and in total. Independent variables DBP, LDL-C and age were removed in female.

Abbreviations: BMI: body mass index, SBP: systolic blood pressure, DBP: diastolic blood pressure, FPG: fasting plasma glucose, TC: total cholesterol, TG: triglyceride, HDL-C: high density lipoprotein cholesterol, LDL-C: low density lipoprotein cholesterol, eGFR: estimated glomerular filtration rate. Standardized beta coefficients (*St B*) refer to how many standard deviations a dependent variable will change per standard deviation increase in the predictor variable.

**Table 4.** The odds ratio for hyperuricemia according to different status of parameters of men and women.

|                                     | Men                 |         |                     |         | Women                 |         |                     |         |
|-------------------------------------|---------------------|---------|---------------------|---------|-----------------------|---------|---------------------|---------|
|                                     | Unadjusted          |         | Full-adjusted       |         | Unadjusted            |         | Full-adjusted       |         |
|                                     | OR (95%CI)          | P-value | OR (95%CI)          | P-value | OR (95%CI)            | P-value | OR (95%CI)          | P-value |
| BMI (kg/m <sup>2</sup> )            |                     |         |                     |         |                       |         |                     |         |
| 18.5 ≤BMI<24.0 (Ref.)               |                     |         |                     |         |                       |         |                     |         |
| BMI<18.5                            | 0.495 (0.330-0.743) | 0.001   | 0.544 (0.361-0.818) | 0.003   | 0.495 (0.313-0.781)   | 0.002   | 0.618 (0.388-0.985) | 0.043   |
| 24.0≤BMI<28.0                       | 2.154 (1.967-2.360) | < 0.001 | 1.857 (1.687-2.044) | < 0.001 | 2.688 (2.347-3.078)   | < 0.001 | 1.926 (1.663-2.230) | < 0.001 |
| BMI≥28.0                            | 3.983 (3.554-4.463) | < 0.001 | 3.231 (2.858-3.652) | < 0.001 | 5.037 (4.279-5.928)   | < 0.001 | 3.148 (2.623-3.778) | < 0.001 |
| Blood pressure (mmHg)               |                     |         |                     |         |                       |         |                     |         |
| Normotensive (Ref.)                 |                     |         |                     |         |                       |         |                     |         |
| Pre-HT                              | 1.288 (1.168-1.420) | < 0.001 | 1.047 (0.945-1.161) | 0.378   | 2.017 (1.726-2.356)   | < 0.001 | 1.259 (1.065-1.488) | 0.007   |
| Grade1 HT                           | 1.673 (1.500-1.866) | < 0.001 | 1.160 (1.031-1.306) | 0.013   | 3.481 (2.954-4.102)   | < 0.001 | 1.580 (1.313-1.900) | < 0.001 |
| Grade2/3 HT                         | 1.728 (1.500-1.990) | < 0.001 | 1.140 (0.977-1.331) | 0.096   | 4.568 (3.725-5.600)   | < 0.001 | 1.615 (1.276-2.044) | < 0.001 |
| FPG (mmol/L)                        |                     |         |                     |         |                       |         |                     |         |
| FPG<6.1 (Ref.)                      |                     |         |                     |         |                       |         |                     |         |
| 6.1≤FPG<7                           | 1.192 (1.029-1.381) | 0.019   | 0.825 (0.704-0.966) | 0.017   | 2.588 (2.098-3.192)   | < 0.001 | 1.282 (1.017-1.615) | 0.035   |
| FPG≥7                               | 0.655 (0.552-0.777) | < 0.001 | 0.368 (0.306-0.444) | < 0.001 | 2.723 (2.217-3.344)   | < 0.001 | 0.848 (0.665-1.081) | 0.183   |
| Cholesterol (mmol/L)                |                     |         |                     |         |                       |         |                     |         |
| TC≤6.22 (Ref.)                      |                     |         |                     |         |                       |         |                     |         |
| TC>6.22                             | 1.908 (1.629-2.235) | < 0.001 | 1.075 (0.877-1.318) | 0.488   | 2.027 (1.702-2.413)   | < 0.001 | 1.086 (0.843-1.399) | 0.523   |
| Triglyceride (mmol/L)               |                     |         |                     |         |                       |         |                     |         |
| TG≤2.26 (Ref.)                      |                     |         |                     |         |                       |         |                     |         |
| TG>2.26                             | 2.868 (2.622-3.137) | < 0.001 | 2.286 (2.069-2.527) | < 0.001 | 4.564 (3.950-5.272)   | < 0.001 | 2.529 (2.137-2.994) | < 0.001 |
| HDL-C (mmol/L)                      |                     |         |                     |         |                       |         |                     |         |
| HDL-C≥1.04 (Ref.)                   |                     |         |                     |         |                       |         |                     |         |
| HDL-C<1.04                          | 1.653 (1.519-1.799) | < 0.001 | 1.102 (1.002-1.211) | 0.044   | 3.271 (2.773-3.859)   | < 0.001 | 1.829 (1.511-2.212) | < 0.001 |
| LDL-C (mmol/L)                      |                     |         |                     |         |                       |         |                     |         |
| LDL-C≤4.14 (Ref.)                   |                     |         |                     |         |                       |         |                     |         |
| LDL-C>4.14                          | 1.742 (1.509-2.011) | < 0.001 | 1.502 (1.253-1.801) | < 0.001 | 1.884 (1.561-2.272)   | < 0.001 | 1.327 (1.018-1.730) | 0.037   |
| eGFR (ml/(min*1.73m <sup>2</sup> )) |                     |         |                     |         |                       |         |                     |         |
| eGFR≥90 (Ref.)                      |                     |         |                     |         |                       |         |                     |         |
| 60≤eGFR<89                          | 1.175 (1.084-1.275) | < 0.001 | 1.230 (1.127-1.342) | < 0.001 | 1.699 (1.499-1.926)   | < 0.001 | 1.716 (1.498-1.966) | < 0.001 |
| eGFR≤59                             | 3.157 (2.629-3.792) | < 0.001 | 3.213 (2.634-3.921) | < 0.001 | 9.473 (7.561-11.868)  | < 0.001 | 7.563 (5.894-9.706) | < 0.001 |
| Albuminuria                         |                     |         |                     |         |                       |         |                     |         |
| -/+ (Ref.)                          |                     |         |                     |         |                       |         |                     |         |
| +                                   | 1.264 (0.895-1.787) | 0.184   | 0.922 (0.633-1.344) | 0.674   | 5.830 (3.827-8.882)   | < 0.001 | 2.951 (1.798-4.843) | < 0.001 |
| ++                                  | 2.138 (1.474-3.101) | < 0.001 | 1.354 (0.902-2.032) | 0.144   | 3.183 (1.849-5.482)   | < 0.001 | 1.549 (0.825-2.908) | 0.173   |
| +++                                 | 3.188 (2.004-5.073) | < 0.001 | 2.223 (1.332-3.707) | 0.002   | 10.317 (5.758-18.486) | < 0.001 | 4.699 (2.395-9.219) | < 0.001 |
| Urinary pH                          |                     |         |                     |         |                       |         |                     |         |
| 6≤pH<7 (Ref.)                       |                     |         |                     |         |                       |         |                     |         |
| pH<6                                | 1.509 (1.391-1.637) | < 0.001 | 1.522 (1.392-1.663) | < 0.001 | 2.083 (1.848-2.347)   | < 0.001 | 1.900 (1.665-2.169) | < 0.001 |
| pH>7                                | 0.556 (0.432-0.716) | < 0.001 | 0.612 (0.472-0.795) | < 0.001 | 0.638 (0.451-0.901)   | 0.011   | 0.728 (0.508-1.043) | 0.084   |
| Nephrolithiasis                     |                     |         |                     |         |                       |         |                     |         |
| No (Ref.)                           |                     |         |                     |         |                       |         |                     |         |
| Yes                                 | 1.317 (1.191-1.457) | < 0.001 | 1.163 (1.044-1.295) | 0.006   | 1.541 (1.315-1.806)   | < 0.001 | 1.253 (1.051-1.494) | 0.012   |

Abbreviations: BMI: body mass index, FPG: fasting plasma glucose, TC: total cholesterol, TG: triglyceride, HDL-C: high density lipoprotein cholesterol, LDL-C: low density lipoprotein cholesterol, eGFR: estimated glomerular filtration rate. Blood pressure (mmHg): normotensive: SBP<120 and DBP<80; pre-HT: SBP of 120-139 and/or DBP of 80-89; Grade1 HT: SBP of 140-159 and/or DBP of 90-99; Grade2/3 HT: SBP≥160 and/or DBP≥100

**Table 5.** The association between SUA and Obesity, hypertension, Diabetes mellitus, Dyslipidemia, CKD, Nephrolithiasis in men.

|                        | Q1      | Q2    |             |         | Q3    |             |         | Q4    |              |         |
|------------------------|---------|-------|-------------|---------|-------|-------------|---------|-------|--------------|---------|
|                        | -       | OR    | 95%CI       | P-value | OR    | 95%CI       | P-value | OR    | 95%CI        | P-value |
| Obesity                |         |       |             |         |       |             |         |       |              |         |
| Model1                 | 1(Ref.) | 1.523 | 1.277-1.816 | < 0.001 | 2.472 | 2.086-2.929 | < 0.001 | 4.517 | 3.824-5.337  | < 0.001 |
| Model2 <sup>a</sup>    | 1(Ref.) | 1.384 | 1.153-1.662 | < 0.001 | 1.975 | 1.653-2.359 | < 0.001 | 3.156 | 2.643-3.768  | < 0.001 |
| Model3 <sup>1</sup>    | 1(Ref.) | 1.392 | 1.159-1.672 | < 0.001 | 1.991 | 1.664-2.382 | < 0.001 | 3.165 | 2.644-3.790  | < 0.001 |
| Hypertension           |         |       |             |         |       |             |         |       |              |         |
| Model1                 | 1(Ref.) | 1.027 | 0.920-1.147 | 0.635   | 1.381 | 1.236-1.543 | < 0.001 | 1.834 | 1.635-2.058  | < 0.001 |
| Model2 <sup>b</sup>    | 1(Ref.) | 0.961 | 0.856-1.079 | 0.501   | 1.169 | 1.039-1.315 | 0.009   | 1.314 | 1.159-1.489  | < 0.001 |
| Model3 <sup>2</sup>    | 1(Ref.) | 0.968 | 0.862-1.087 | 0.582   | 1.188 | 1.055-1.338 | 0.004   | 1.341 | 1.181-1.524  | < 0.001 |
| Diabetes mellitus      |         |       |             |         |       |             |         |       |              |         |
| Model1                 | 1(Ref.) | 0.545 | 0.462-0.643 | < 0.001 | 0.451 | 0.377-0.540 | < 0.001 | 0.412 | 0.338-0.501  | < 0.001 |
| Model2 <sup>c</sup>    | 1(Ref.) | 0.439 | 0.369-0.521 | < 0.001 | 0.292 | 0.241-0.353 | < 0.001 | 0.212 | 0.171-0.262  | < 0.001 |
| Model3 <sup>3</sup>    | 1(Ref.) | 0.446 | 0.374-0.532 | < 0.001 | 0.296 | 0.244-0.360 | < 0.001 | 0.206 | 0.165-0.257  | < 0.001 |
| Dyslipidemia           |         |       |             |         |       |             |         |       |              |         |
| Model1                 | 1(Ref.) | 1.510 | 1.361-1.675 | < 0.001 | 2.122 | 1.912-2.355 | < 0.001 | 3.645 | 3.271-4.061  | < 0.001 |
| Model2 <sup>d</sup>    | 1(Ref.) | 1.425 | 1.278-1.589 | < 0.001 | 1.800 | 1.612-2.009 | < 0.001 | 2.665 | 2.374-2.992  | < 0.001 |
| Model3 <sup>4</sup>    | 1(Ref.) | 1.404 | 1.259-1.566 | < 0.001 | 1.742 | 1.559-1.947 | < 0.001 | 2.490 | 2.213-2.801  | < 0.001 |
| Chronic kidney disease |         |       |             |         |       |             |         |       |              |         |
| Model1                 | 1(Ref.) | 1.762 | 1.241-2.502 | 0.002   | 2.514 | 1.784-3.544 | < 0.001 | 5.980 | 4.309-8.299  | < 0.001 |
| Model2 <sup>e</sup>    | 1(Ref.) | 1.966 | 1.376-2.810 | < 0.001 | 2.800 | 1.966-3.987 | < 0.001 | 6.913 | 4.890-9.771  | < 0.001 |
| Model3 <sup>5</sup>    | 1(Ref.) | 1.965 | 1.371-2.817 | < 0.001 | 2.851 | 1.998-4.068 | < 0.001 | 7.081 | 4.985-10.058 | < 0.001 |
| Nephrolithiasis        |         |       |             |         |       |             |         |       |              |         |
| Model1                 | 1(Ref.) | 1.246 | 1.089-1.427 | 0.001   | 1.288 | 1.122-1.478 | < 0.001 | 1.616 | 1.406-1.859  | < 0.001 |
| Model2 <sup>f</sup>    | 1(Ref.) | 1.161 | 1.012-1.331 | 0.033   | 1.142 | 0.992-1.316 | 0.065   | 1.338 | 1.154-1.552  | < 0.001 |
| Model3 <sup>6</sup>    | 1(Ref.) | 1.222 | 1.064-1.404 | 0.005   | 1.221 | 1.058-1.409 | 0.006   | 1.469 | 1.261-1.710  | < 0.001 |

Model 1: adjusted for age

<sup>a</sup>Model 2: adjusted for variables included in model1 and SBP, DBP, FPG, TC, TG, HDL-C, LDL-C; <sup>b</sup>Model2: adjusted for variables included in model1 and BMI, FPG, TC, TG, HDL-C, LDL-C; <sup>c</sup>Model2: adjusted for variables included in model1 and BMI, SBP, DBP, TC, TG, HDL-C, LDL-C; <sup>d</sup>Model2: adjusted for variables included in model1 and BMI, SBP, DBP, FPG; <sup>e</sup>Model2: adjusted for variables included in model1 and BMI, SBP, DBP, FPG, TC, TG, HDL-C, LDL-C; <sup>f</sup>Model2: adjusted for variables included in model1 and BMI, SBP, DBP, FPG, TC, TG, HDL-C, LDL-C.

<sup>1</sup>Model 3: adjusted for variables included in model2<sup>a</sup> and eGFR, urine Ph, albuminuria, nephrolithiasis; <sup>2</sup>Model 3: adjusted for variables included in model2<sup>b</sup> and eGFR, urine Ph, albuminuria, nephrolithiasis; <sup>3</sup>Model 3: adjusted for variables included in model2<sup>c</sup> and eGFR, urine Ph, albuminuria, nephrolithiasis; <sup>4</sup>Model 3: adjusted for variables included in model2<sup>d</sup> and eGFR, urine Ph, albuminuria, nephrolithiasis; <sup>5</sup>Model 3: adjusted for variables included in model2<sup>e</sup> and urine Ph, albuminuria, nephrolithiasis; <sup>6</sup>Model 3: adjusted for variables included in model2<sup>f</sup> and eGFR, urine Ph, albuminuria.

Abbreviations: BMI: body mass index, SBP: systolic blood pressure, DBP: diastolic blood pressure, FPG: fasting plasma glucose, TC: total cholesterol, TG: triglyceride, HDL-C: high density lipoprotein cholesterol, LDL-C: low density lipoprotein cholesterol, eGFR: estimated glomerular filtration rate.

**Table 6.** The association between SUA and Obesity, hypertension, Diabetes mellitus, Dyslipidemia, CKD, Nephrolithiasis in women.

|                               | Q1      | Q2    |             |         | Q3    |             |         | Q4     |              |         |
|-------------------------------|---------|-------|-------------|---------|-------|-------------|---------|--------|--------------|---------|
|                               | -       | OR    | 95%CI       | P-value | OR    | 95%CI       | P-value | OR     | 95%CI        | P-value |
| <b>Obesity</b>                |         |       |             |         |       |             |         |        |              |         |
| Model1                        | 1(Ref.) | 2.006 | 1.635-2.462 | < 0.001 | 3.626 | 2.949-4.458 | < 0.001 | 5.874  | 4.710-7.325  | < 0.001 |
| Model2 <sup>a</sup>           | 1(Ref.) | 1.652 | 1.337-2.042 | < 0.001 | 2.480 | 1.997-3.079 | < 0.001 | 3.594  | 2.841-4.546  | < 0.001 |
| Model3 <sup>1</sup>           | 1(Ref.) | 1.677 | 1.356-2.074 | < 0.001 | 2.522 | 2.027-3.138 | < 0.001 | 3.776  | 2.969-4.802  | < 0.001 |
| <b>Hypertension</b>           |         |       |             |         |       |             |         |        |              |         |
| Model1                        | 1(Ref.) | 1.291 | 1.139-1.465 | < 0.001 | 1.597 | 1.392-1.831 | < 0.001 | 2.091  | 1.780-2.455  | < 0.001 |
| Model2 <sup>b</sup>           | 1(Ref.) | 1.117 | 0.978-1.275 | 0.103   | 1.146 | 0.989-1.327 | 0.070   | 1.240  | 1.040-1.479  | 0.016   |
| Model3 <sup>2</sup>           | 1(Ref.) | 1.134 | 0.993-1.296 | 0.064   | 1.189 | 1.024-1.381 | 0.023   | 1.289  | 1.076-1.545  | 0.006   |
| <b>Diabetes mellitus</b>      |         |       |             |         |       |             |         |        |              |         |
| Model1                        | 1(Ref.) | 0.872 | 0.686-1.108 | 0.262   | 1.152 | 0.898-1.478 | 0.265   | 1.578  | 1.208-2.061  | 0.001   |
| Model2 <sup>c</sup>           | 1(Ref.) | 0.616 | 0.478-0.793 | < 0.001 | 0.609 | 0.466-0.797 | < 0.001 | 0.601  | 0.446-0.809  | 0.001   |
| Model3 <sup>3</sup>           | 1(Ref.) | 0.597 | 0.462-0.771 | < 0.001 | 0.564 | 0.428-0.742 | < 0.001 | 0.524  | 0.384-0.715  | < 0.001 |
| <b>Dyslipidemia</b>           |         |       |             |         |       |             |         |        |              |         |
| Model1                        | 1(Ref.) | 1.669 | 1.464-1.902 | < 0.001 | 2.720 | 2.370-3.120 | < 0.001 | 4.675  | 3.995-5.471  | < 0.001 |
| Model2 <sup>d</sup>           | 1(Ref.) | 1.580 | 1.382-1.805 | < 0.001 | 2.365 | 2.052-2.725 | < 0.001 | 3.768  | 3.201-4.436  | < 0.001 |
| Model3 <sup>4</sup>           | 1(Ref.) | 1.570 | 1.374-1.795 | < 0.001 | 2.298 | 1.991-2.652 | < 0.001 | 3.614  | 3.058-4.272  | < 0.001 |
| <b>Chronic kidney disease</b> |         |       |             |         |       |             |         |        |              |         |
| Model1                        | 1(Ref.) | 1.967 | 1.244-3.109 | 0.004   | 3.719 | 2.380-5.812 | < 0.001 | 9.603  | 6.208-14.857 | < 0.001 |
| Model2 <sup>e</sup>           | 1(Ref.) | 2.107 | 1.327-3.346 | 0.002   | 4.177 | 2.641-6.608 | < 0.001 | 11.434 | 7.220-18.108 | < 0.001 |
| Model3 <sup>5</sup>           | 1(Ref.) | 2.065 | 1.299-3.283 | 0.002   | 4.295 | 2.711-6.807 | < 0.001 | 11.571 | 7.267-18.423 | < 0.001 |
| <b>Nephrolithiasis</b>        |         |       |             |         |       |             |         |        |              |         |
| Model1                        | 1(Ref.) | 0.928 | 0.803-1.072 | 0.311   | 1.184 | 1.012-1.385 | 0.035   | 1.308  | 1.084-1.578  | 0.005   |
| Model2 <sup>f</sup>           | 1(Ref.) | 0.860 | 0.743-0.997 | 0.045   | 1.026 | 0.870-1.209 | 0.762   | 1.037  | 0.848-1.269  | 0.723   |
| Model3 <sup>6</sup>           | 1(Ref.) | 0.897 | 0.773-1.041 | 0.153   | 1.117 | 0.944-1.321 | 0.196   | 1.242  | 1.009-1.530  | 0.041   |

Model 1: adjusted for age

<sup>a</sup>Model 2: adjusted for variables included in model1 and SBP, DBP, FPG, TC, TG, HDL-C, LDL-C; <sup>b</sup>Model2: adjusted for variables included in model1 and BMI, FPG, TC, TG, HDL-C, LDL-C; <sup>c</sup>Model2: adjusted for variables included in model1 and BMI, SBP, DBP, TC, TG, HDL-C, LDL-C; <sup>d</sup>Model2: adjusted for variables included in model1 and BMI, SBP, DBP, FPG; <sup>e</sup>Model2: adjusted for variables included in model1 and BMI, SBP, DBP, FPG, TC, TG, HDL-C, LDL-C; <sup>f</sup>Model2: adjusted for variables included in model1 and BMI, SBP, DBP, FPG, TC, TG, HDL-C, LDL-C.

<sup>1</sup>Model 3: adjusted for variables included in model2<sup>a</sup> and eGFR, urine Ph, albuminuria, nephrolithiasis; <sup>2</sup>Model 3: adjusted for variables included in model2<sup>b</sup> and eGFR, urine Ph, albuminuria, nephrolithiasis; <sup>3</sup>Model 3: adjusted for variables included in model2<sup>c</sup> and eGFR, urine Ph, albuminuria, nephrolithiasis; <sup>4</sup>Model 3: adjusted for variables included in model2<sup>d</sup> and eGFR, urine Ph, albuminuria, nephrolithiasis; <sup>5</sup>Model 3: adjusted for variables included in model2<sup>e</sup> and urine Ph, albuminuria, nephrolithiasis; <sup>6</sup>Model 3: adjusted for variables included in model2<sup>f</sup> and eGFR, urine Ph, albuminuria.

Abbreviations: BMI: body mass index, SBP: systolic blood pressure, DBP: diastolic blood pressure, FPG: fasting plasma glucose, TC: total cholesterol, TG: triglyceride, HDL-C: high density lipoprotein cholesterol, LDL-C: low density lipoprotein cholesterol, eGFR: estimated glomerular filtration rate.

**Table 7.** The association between hyperuricemia and clustered CVD risk factors.

| Clustered CVD risk factors | Men        |             |                 |              |             |                 | Women      |              |                 |              |             |                 |
|----------------------------|------------|-------------|-----------------|--------------|-------------|-----------------|------------|--------------|-----------------|--------------|-------------|-----------------|
|                            | Unadjusted |             |                 | Age-adjusted |             |                 | Unadjusted |              |                 | Age-adjusted |             |                 |
|                            | OR         | 95%CI       | <i>P</i> -value | OR           | 95%CI       | <i>P</i> -value | OR         | 95%CI        | <i>P</i> -value | OR           | 95%CI       | <i>P</i> -value |
| 0                          | Ref.       |             |                 |              |             |                 |            |              |                 |              |             |                 |
| 1                          | 1.959      | 1.781-2.155 | < 0.001         | 2.140        | 1.941-2.359 | < 0.001         | 3.314      | 2.861-3.839  | < 0.001         | 2.614        | 2.236-3.057 | < 0.001         |
| 2                          | 3.010      | 2.697-3.358 | < 0.001         | 3.441        | 3.071-3.856 | < 0.001         | 5.974      | 5.062-7.049  | < 0.001         | 4.325        | 3.614-5.177 | < 0.001         |
| ≥3                         | 3.403      | 2.917-3.971 | < 0.001         | 3.889        | 3.322-4.552 | < 0.001         | 8.889      | 7.086-11.149 | < 0.001         | 6.270        | 4.936-7.964 | < 0.001         |
| <i>P</i> value for trend   |            |             | < 0.001         |              |             | < 0.001         |            |              | < 0.001         |              |             | < 0.001         |

Clustered CVD risk factors included obesity, hypertension, diabetes mellitus, dyslipidemia

For peer review only

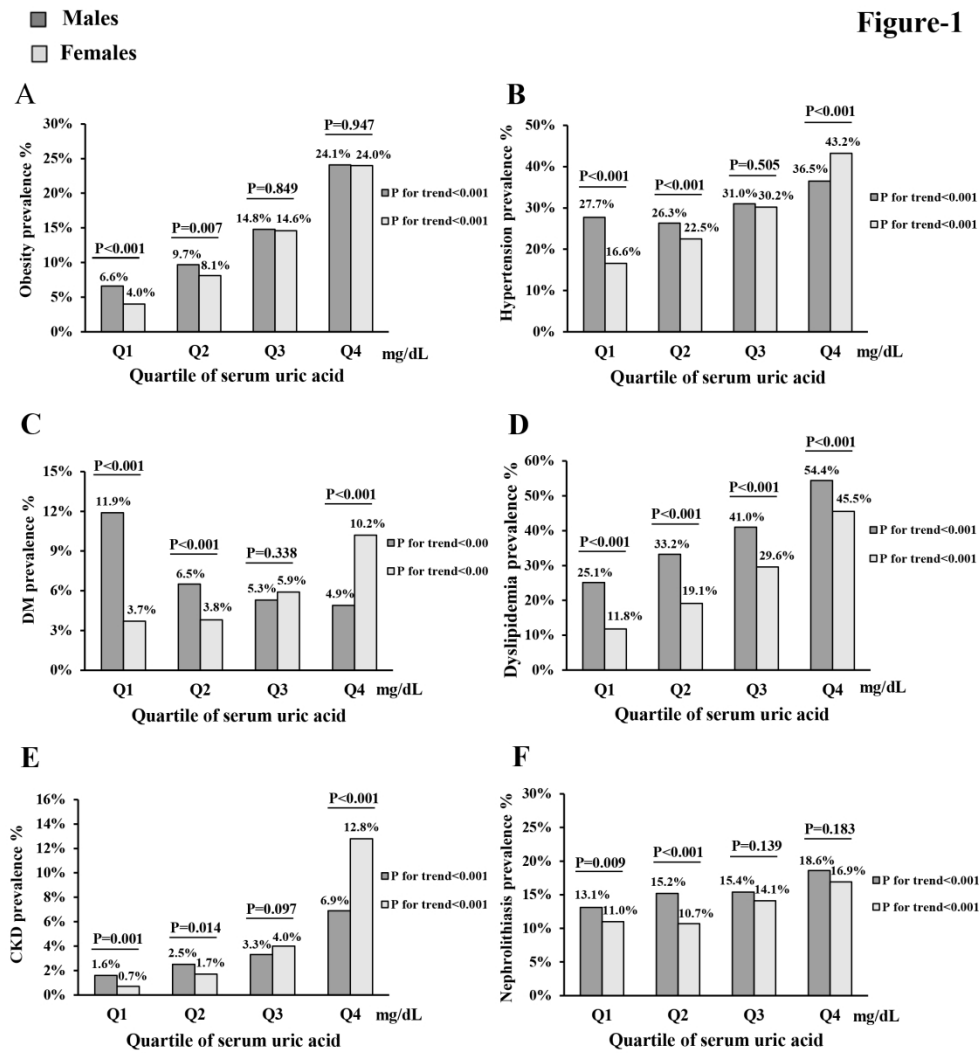

Figure legend

Figure 1. Prevalence of major CVD risk factors, renal diseases in different levels of serum uric acid. Prevalence of obesity(A), hypertension(B), diabetes mellitus(C), dyslipidemia(D), chronic kidney disease (E) and nephrolithiasis(F) in different levels of serum uric acid. The gender-specific quartiles of uric acid (mg/dL), Q1: males (M)  $\leq 4.9$ , females (F)  $\leq 3.9$ ; Q2: M 5.0-5.9, F 4.0-4.9; Q3: M 6.0-6.9, F 5.0-5.9; Q4: M  $\geq 7.0$ , F  $\geq 6.0$ .

STROBE Statement—Checklist of items that should be included in reports of *cross-sectional studies*

|                           | Item No | Recommendation                                                                                                                                                                                                                                                                                                                                                                                                                                                                                                                                                                                                                                                                                                                                                                                                                                                                                                                                                                                                                                                                                                                                                                                                                                                                                                                                                                                                                                                                                                                                                                                                                                                                                                                                                                                                                                                                                                                                                                                                                                                                                                                                                                                                                                                                                                                                                                                                                                                                                                                                                                                                                                                                                                                                                                                                        |
|---------------------------|---------|-----------------------------------------------------------------------------------------------------------------------------------------------------------------------------------------------------------------------------------------------------------------------------------------------------------------------------------------------------------------------------------------------------------------------------------------------------------------------------------------------------------------------------------------------------------------------------------------------------------------------------------------------------------------------------------------------------------------------------------------------------------------------------------------------------------------------------------------------------------------------------------------------------------------------------------------------------------------------------------------------------------------------------------------------------------------------------------------------------------------------------------------------------------------------------------------------------------------------------------------------------------------------------------------------------------------------------------------------------------------------------------------------------------------------------------------------------------------------------------------------------------------------------------------------------------------------------------------------------------------------------------------------------------------------------------------------------------------------------------------------------------------------------------------------------------------------------------------------------------------------------------------------------------------------------------------------------------------------------------------------------------------------------------------------------------------------------------------------------------------------------------------------------------------------------------------------------------------------------------------------------------------------------------------------------------------------------------------------------------------------------------------------------------------------------------------------------------------------------------------------------------------------------------------------------------------------------------------------------------------------------------------------------------------------------------------------------------------------------------------------------------------------------------------------------------------------|
| <b>Title and abstract</b> | 1       | <p>(a) The relationship between serum uric acid and clustering of cardiovascular disease risk factors, renal disorders among Shanghai population: a multi-center and cross-sectional study</p> <p>(b) <b>Objectives</b> To estimate the current prevalence of cardiovascular disease risk factors (CRFs) and renal disorders across serum uric acid (SUA) quartiles, and evaluate the relationships between SUA and CRFs, renal diseases in Shanghai population. <b>Study design</b> Observational, cross-sectional study. <b>Setting</b> Data were obtained from physical checkups of local residents at three hospitals in Shanghai. <b>Participants</b> Residents were invited to take part in physical checkups and provided informed consents. Exclusion criteria were diseases that resemble cancer, hepatic disease and other coexisting illnesses including autoimmune kidney diseases, renal artery stenosis, individuals treated with xanthine oxidase inhibitors and without complete information. There are 26768 individuals in our study. <b>Primary and secondary outcome measures</b> Hyperuricemia was defined as SUA <math>\geq 7</math> mg/dL in males and <math>\geq 6</math> mg/dL in females or taking xanthine oxidase inhibitors. Subjects were divided into gender-specific quartiles. We estimate the prevalence of CRFs and renal disorders across SUA quartiles. The relationships between SUA and CRFs, renal disorders at different gender were evaluated with logistic regression analysis. <b>Results:</b> There was a significant increase in the prevalence of major CRFs and renal diseases across SUA quartiles in separate analysis among men and women (all <math>P</math>-trend<math>&lt;0.001</math>). After multiple adjustment, hyperuricemia positively correlated with obesity (Male OR=3.165, <math>P&lt;0.001</math>; Female OR=3.776, <math>P&lt;0.001</math>), hypertension (Male OR=1.341, <math>P&lt;0.001</math>; Female OR=1.289, <math>P=0.006</math>), dyslipidemia (Male OR=2.490, <math>P&lt;0.001</math>; Female OR=3.614, <math>P&lt;0.001</math>), chronic kidney disease (Male OR=7.081, <math>P&lt;0.001</math>; Female OR=11.571, <math>P&lt;0.001</math>), nephrolithiasis (Male OR=1.469, <math>P&lt;0.001</math>; Female OR=1.242, <math>P=0.041</math>), but negatively correlated with diabetes mellitus (Male OR=0.206, <math>P&lt;0.001</math>; Female OR=0.524, <math>P&lt;0.001</math>). Women had a stronger association between hyperuricemia and clustered CRFs as well as CKD than men. <b>Conclusions:</b> In Shanghai population, concomitant with the elevated level of SUA, the prevalence of CRFs and renal diseases was rising. Hyperuricemia was significantly associated with CRFs and renal disorders, especially in females.</p> |
| <b>Introduction</b>       |         |                                                                                                                                                                                                                                                                                                                                                                                                                                                                                                                                                                                                                                                                                                                                                                                                                                                                                                                                                                                                                                                                                                                                                                                                                                                                                                                                                                                                                                                                                                                                                                                                                                                                                                                                                                                                                                                                                                                                                                                                                                                                                                                                                                                                                                                                                                                                                                                                                                                                                                                                                                                                                                                                                                                                                                                                                       |
| Background/rationale      | 2       | The relationship between hyperuricemia and cardiovascular disease risk factors (CRFs) at different gender of Shanghai population has not been well studied. And the data from multiple clinical centers in China are extremely limited. Whether serum uric acid (SUA) is a cause or an association to renal diseases is a question that still waits for further investigations. Thus, we estimate the current prevalence of CRFs and renal disorders across SUA quartiles, and evaluate the relationships between SUA and CRFs, renal diseases in Shanghai population.                                                                                                                                                                                                                                                                                                                                                                                                                                                                                                                                                                                                                                                                                                                                                                                                                                                                                                                                                                                                                                                                                                                                                                                                                                                                                                                                                                                                                                                                                                                                                                                                                                                                                                                                                                                                                                                                                                                                                                                                                                                                                                                                                                                                                                                |
| Objectives                | 3       | To estimate the current prevalence of cardiovascular disease risk factors (CRFs) and renal disorders across serum uric acid (SUA) quartiles, and evaluate the relationships between SUA and CRFs, renal diseases in Shanghai population.                                                                                                                                                                                                                                                                                                                                                                                                                                                                                                                                                                                                                                                                                                                                                                                                                                                                                                                                                                                                                                                                                                                                                                                                                                                                                                                                                                                                                                                                                                                                                                                                                                                                                                                                                                                                                                                                                                                                                                                                                                                                                                                                                                                                                                                                                                                                                                                                                                                                                                                                                                              |
| <b>Methods</b>            |         |                                                                                                                                                                                                                                                                                                                                                                                                                                                                                                                                                                                                                                                                                                                                                                                                                                                                                                                                                                                                                                                                                                                                                                                                                                                                                                                                                                                                                                                                                                                                                                                                                                                                                                                                                                                                                                                                                                                                                                                                                                                                                                                                                                                                                                                                                                                                                                                                                                                                                                                                                                                                                                                                                                                                                                                                                       |
| Study design              | 4       | Observational, cross-sectional study                                                                                                                                                                                                                                                                                                                                                                                                                                                                                                                                                                                                                                                                                                                                                                                                                                                                                                                                                                                                                                                                                                                                                                                                                                                                                                                                                                                                                                                                                                                                                                                                                                                                                                                                                                                                                                                                                                                                                                                                                                                                                                                                                                                                                                                                                                                                                                                                                                                                                                                                                                                                                                                                                                                                                                                  |
| Setting                   | 5       | Data were obtained from physical checkups of local residents at three hospitals in                                                                                                                                                                                                                                                                                                                                                                                                                                                                                                                                                                                                                                                                                                                                                                                                                                                                                                                                                                                                                                                                                                                                                                                                                                                                                                                                                                                                                                                                                                                                                                                                                                                                                                                                                                                                                                                                                                                                                                                                                                                                                                                                                                                                                                                                                                                                                                                                                                                                                                                                                                                                                                                                                                                                    |

|                                                                 |    |                                                                                                                                                                                                                                                                                                                                                                                                                                                                                                                                                                                                                                                                                                                                                                                                                                                                                                                                                                                                                                                                                                                                                                                                                                                                                                                                                                                                                                                                                                                                                                                                                                                                                                                                                                                                                                                                                                                                                                                                                                                                                                                                                                                                                                                                                                                                                   |
|-----------------------------------------------------------------|----|---------------------------------------------------------------------------------------------------------------------------------------------------------------------------------------------------------------------------------------------------------------------------------------------------------------------------------------------------------------------------------------------------------------------------------------------------------------------------------------------------------------------------------------------------------------------------------------------------------------------------------------------------------------------------------------------------------------------------------------------------------------------------------------------------------------------------------------------------------------------------------------------------------------------------------------------------------------------------------------------------------------------------------------------------------------------------------------------------------------------------------------------------------------------------------------------------------------------------------------------------------------------------------------------------------------------------------------------------------------------------------------------------------------------------------------------------------------------------------------------------------------------------------------------------------------------------------------------------------------------------------------------------------------------------------------------------------------------------------------------------------------------------------------------------------------------------------------------------------------------------------------------------------------------------------------------------------------------------------------------------------------------------------------------------------------------------------------------------------------------------------------------------------------------------------------------------------------------------------------------------------------------------------------------------------------------------------------------------|
| Shanghai during the period from January 2015 and December 2015. |    |                                                                                                                                                                                                                                                                                                                                                                                                                                                                                                                                                                                                                                                                                                                                                                                                                                                                                                                                                                                                                                                                                                                                                                                                                                                                                                                                                                                                                                                                                                                                                                                                                                                                                                                                                                                                                                                                                                                                                                                                                                                                                                                                                                                                                                                                                                                                                   |
| Participants                                                    | 6  | Residents were invited to take part in physical checkups and provided informed consents. Exclusion criteria were diseases that resemble cancer, hepatic disease and other coexisting illnesses including autoimmune kidney diseases, renal artery stenosis, individuals treated with xanthine oxidase inhibitors and without complete information. There are 26768 individuals in our study.                                                                                                                                                                                                                                                                                                                                                                                                                                                                                                                                                                                                                                                                                                                                                                                                                                                                                                                                                                                                                                                                                                                                                                                                                                                                                                                                                                                                                                                                                                                                                                                                                                                                                                                                                                                                                                                                                                                                                      |
| Variables                                                       | 7  | Hyperuricemia was defined as serum uric acid $\geq 7$ mg/dL in males and $\geq 6$ mg/dL in females or current use of xanthine oxidase inhibitors. SUA was determined using the uricase-peroxidase method. Body mass index (BMI) was calculated as weight in kilograms divided by height in squared meters. According to WHO guidelines for the Asian Pacific population, normal weight was defined as $18.5 \leq \text{BMI} < 24.0$ kg/m <sup>2</sup> , overweight was defined as $24.0 \leq \text{BMI} < 28.0$ kg/m <sup>2</sup> , obesity was defined as BMI $\geq 28.0$ kg/m <sup>2</sup> , underweight was defined as BMI $< 18.5$ kg/m <sup>2</sup> . Blood pressure measurements were taken according to the Joint National Committee VII criteria (JNC VII). Normal BP was defined as having SBP $< 120$ mmHg and DBP $< 80$ mmHg. Pre-hypertension was defined as having SBP of 120–139 mmHg and/or DBP of 80–89 mmHg. Grade 1 hypertension was defined as having SBP of 140–159 mmHg and/or DBP of 90–99 mmHg. Grade 2 or grade 3 hypertension was defined as SBP $\geq 160$ mmHg and/or DBP $\geq 100$ mmHg. According to the Chinese adult dyslipidemia prevention guide (2007 edition), individuals with a fasting TC $\geq 6.22$ mmol/L, TG $\geq 2.26$ mmol/L, HDL-C $< 1.04$ mmol/L, and/or LDL-C $> 4.14$ mmol/L, or currently undergoing pharmacologic treatment were defined as the dyslipidemia. T2D was defined based on World Health Organization (WHO) 1999 diagnostic criteria as fasting plasma glucose $\geq 7.0$ mmol/l or 2-h plasma glucose $\geq 11.1$ mmol/l, impaired fasting glucose (IFG) was defined as $6.1 \text{ mmol/l} \leq \text{FPG} < 7.0 \text{ mmol/l}$ , and normal condition was defined as $\text{FPG} < 6.1 \text{ mmol/l}$ . The eGFR was calculated using Modification of Diet in Renal Disease (MDRD) formula: $186 \times [\text{serum creatinine (mg/dl)}]^{-1.154} \times (\text{age})^{-0.203} \times [0.742 \text{ (if female)}]$ . According to the Kidney Disease Outcomes Quality Initiative (KDOQI) clinical practice guideline, estimated glomerular filtration rate (eGFR) $< 60 \text{ mL/min/1.73 m}^2$ , proteinuria and hematuria were defined as markers of CKD. Urine proteinuria were recorded as negative (–), trace, 1+, 2+ and 3+. Albuminuria was defined as $\geq 1+$ . |
| Data sources/<br>measurement                                    | 8* | The permanent residents aged between 16-98 years who participated in the health checkups during the period from January 2015 and December 2015 of three medical centers Shanghai East Hospital Affiliated to Tongji University School of Medicine, Pudong New District Gongli Hospital and Baoshan Branch of Shanghai First People's Hospital were invited in the study. We divided the subjects into gender-specific quartiles [males (M): Q1 $\leq 4.9$ , Q2: 5.0-5.9, Q3: 6.0-6.9, Q4 $\geq 7.0$ mg/dL; females (F): Q1 $\leq 3.9$ , Q2: 4.0-4.9, Q3: 5.0-5.9, Q4 $\geq 6.0$ mg/dL] according to serum uric acid level.                                                                                                                                                                                                                                                                                                                                                                                                                                                                                                                                                                                                                                                                                                                                                                                                                                                                                                                                                                                                                                                                                                                                                                                                                                                                                                                                                                                                                                                                                                                                                                                                                                                                                                                        |
| Bias                                                            | 9  | We conducted a multi-center study with large sample size to reduce selection bias. We set a strict exclusion criteria based on medical histories and laboratory findings to reduce information bias.                                                                                                                                                                                                                                                                                                                                                                                                                                                                                                                                                                                                                                                                                                                                                                                                                                                                                                                                                                                                                                                                                                                                                                                                                                                                                                                                                                                                                                                                                                                                                                                                                                                                                                                                                                                                                                                                                                                                                                                                                                                                                                                                              |
| Study size                                                      | 10 | There are 26768 individuals in our study.                                                                                                                                                                                                                                                                                                                                                                                                                                                                                                                                                                                                                                                                                                                                                                                                                                                                                                                                                                                                                                                                                                                                                                                                                                                                                                                                                                                                                                                                                                                                                                                                                                                                                                                                                                                                                                                                                                                                                                                                                                                                                                                                                                                                                                                                                                         |
| Quantitative variables                                          | 11 | The continuous variables are reported in means $\pm$ SD and categorical variables are presented in percentages. In case of nonparametric data distribution medians with inter quartile range (IQR) are presented. The univariate analysis of variance (ANOVA) was used to measure the data among the groups or a Kruskal-Wallis test in case of nonparametric data distribution. Differences between groups for proportions were                                                                                                                                                                                                                                                                                                                                                                                                                                                                                                                                                                                                                                                                                                                                                                                                                                                                                                                                                                                                                                                                                                                                                                                                                                                                                                                                                                                                                                                                                                                                                                                                                                                                                                                                                                                                                                                                                                                  |



tested with a chi-square test. If the results show differences between the groups, the post-hoc tests would be done. As for the post-hoc test of normally distributed data, we used least significance difference (LSD) test if the variance was homogeneous, and we used Tamhane's T2 test if not. The post-hoc test of non-normally distributed data was compared using Kruskal-Wallis test. As for the post-hoc test of categorical variables, we used chi-square tests.

|                     |    |                                                                                                                                                                                                                                                                                                                                                                                                                                                                                                                                                                                                                                                                                                                                                                                                                                                                                                                                                                                                                                                                                                                                                                                                                                                                                                 |
|---------------------|----|-------------------------------------------------------------------------------------------------------------------------------------------------------------------------------------------------------------------------------------------------------------------------------------------------------------------------------------------------------------------------------------------------------------------------------------------------------------------------------------------------------------------------------------------------------------------------------------------------------------------------------------------------------------------------------------------------------------------------------------------------------------------------------------------------------------------------------------------------------------------------------------------------------------------------------------------------------------------------------------------------------------------------------------------------------------------------------------------------------------------------------------------------------------------------------------------------------------------------------------------------------------------------------------------------|
| Statistical methods | 12 | Correlations were Pearson's or Spearman's depending on the distribution of the data. In the present study, SUA, age, BMI, SBP, DBP, FPG, TC, TG, HDL-C, LDL-C, eGFR were normally distributed. Thus, Pearson's correlation was used among these variables. If Pearson's correlation analysis was statistically significant, multiple linear regression analysis was performed to determine the association of SUA with various independent variables. We analyzed the multiple collinearity by calculating the correlation coefficient matrix, tolerance and variance inflation factor of independent variables. Multivariable logistic regression analysis (unadjusted and full-adjusted) was used to calculate the odds ratio for hyperuricemia according to different status of clinical parameters. Furthermore, multivariable logistic regression analysis (multiple adjusted models) was used to examine the association between related diseases and the SUA categories of Q2 or greater compared to the lowest SUA category. The association between hyperuricemia and clustered CVD risk factors had been calculated. Statistical analyses were performed by IBM SPSS statistics version 20.0 (SPSS, Chicago, IL, USA). Statistical significance was set at <i>P</i> -values of <0.05. |
|---------------------|----|-------------------------------------------------------------------------------------------------------------------------------------------------------------------------------------------------------------------------------------------------------------------------------------------------------------------------------------------------------------------------------------------------------------------------------------------------------------------------------------------------------------------------------------------------------------------------------------------------------------------------------------------------------------------------------------------------------------------------------------------------------------------------------------------------------------------------------------------------------------------------------------------------------------------------------------------------------------------------------------------------------------------------------------------------------------------------------------------------------------------------------------------------------------------------------------------------------------------------------------------------------------------------------------------------|

## Results

|                  |     |                                                                                                                                                                                                                                                                                                                                                                                                                                                                                                                                                                                                                                                                                                                                                                                                                                                                                                                                                                                             |
|------------------|-----|---------------------------------------------------------------------------------------------------------------------------------------------------------------------------------------------------------------------------------------------------------------------------------------------------------------------------------------------------------------------------------------------------------------------------------------------------------------------------------------------------------------------------------------------------------------------------------------------------------------------------------------------------------------------------------------------------------------------------------------------------------------------------------------------------------------------------------------------------------------------------------------------------------------------------------------------------------------------------------------------|
| Participants     | 13* | After excluding subjects with incomplete data, cancer, hepatic disease or other coexisting illnesses including autoimmune kidney diseases, renal artery stenosis and subjects treated with xanthine oxidase inhibitors, 26768 participants were enrolled in our study.                                                                                                                                                                                                                                                                                                                                                                                                                                                                                                                                                                                                                                                                                                                      |
| Descriptive data | 14* | According to our multi-center epidemiologic study of 26768 subjects, the prevalence of hyperuricemia in Shanghai was 17.2% (95%CI 16.8%-17.7%), 22.2% (21.5–22.9%) in men and 10.8% (10.3–11.4%) in women.                                                                                                                                                                                                                                                                                                                                                                                                                                                                                                                                                                                                                                                                                                                                                                                  |
| Outcome data     | 15* | In the male hyperuricemia individuals, the prevalence rates of obesity, hypertension, diabetes mellitus, dyslipidemia, chronic kidney disease and nephrolithiasis were 24.1% (95% CI, 22.6-25.5%), 36.5% (34.9-38.2%), 4.9% (4.2-5.7%), 54.4% (52.7-56.1%), 6.9% (6.1-7.8%) and 18.6% (17.3-19.9%) respectively. In the female hyperuricemia individuals, the prevalence rates of obesity, hypertension, diabetes mellitus, dyslipidemia, chronic kidney disease and nephrolithiasis were 24.0% (21.6-26.3%), 43.2% (40.5-46.0%), 10.2% (8.6-11.9%), 45.5% (42.8-48.3%), 12.8% (11.0-14.7%) and 16.9% (14.8-19.0%) , respectively.                                                                                                                                                                                                                                                                                                                                                          |
| Main results     | 16  | Multivariable logistic regression analysis (multiple adjusted models) was studied and the results were shown in Table 5. The odd ratio for obesity, hypertension, diabetes mellitus, dyslipidemia, chronic kidney disease, nephrolithiasis in the highest SUA quartile was 3.165 (95% CI 2.644-3.790, <i>P</i> <0.001, model 3) , 1.341 (95% CI 1.181-1.524, <i>P</i> <0.001, model 3), 0.206 (95% CI 0.165-0.257, <i>P</i> <0.001, model 3), 2.490 (95% CI 2.213–2.801, <i>P</i> <0.001, model 3), 7.081 (95% CI 4.985-10.058, <i>P</i> <0.001, model 3), 1.469 (95% CI 1.261–1.710, <i>P</i> <0.001, model 3) compared with that in the lowest SUA quartile, respectively, in men. The data in Table 6 were multivariable logistic regression analysis in women and the odd ratio for obesity, hypertension, diabetes mellitus, dyslipidemia, chronic kidney disease, nephrolithiasis in the highest SUA quartile was 3.776 (95% CI 2.969-4.802, <i>P</i> <0.001, model 3), 1.289 (95% CI |

1.076-1.545,  $P = 0.006$ , model 3), 0.524 (95% CI 0.384-0.715,  $P < 0.001$ , model 3), 3.614 (95% CI 3.058-4.272,  $P < 0.001$ , model 3), 11.571 (95% CI 7.267-18.423,  $P < 0.001$ , model 3), 1.242 (95% CI 1.009-1.530,  $P = 0.041$ , model 3) compared with that in the lowest SUA quartile, respectively.

|                |    |                                                                                                                                                                                                                                                                                                                                                                                                                                                                                                                                                                                                                                                                            |
|----------------|----|----------------------------------------------------------------------------------------------------------------------------------------------------------------------------------------------------------------------------------------------------------------------------------------------------------------------------------------------------------------------------------------------------------------------------------------------------------------------------------------------------------------------------------------------------------------------------------------------------------------------------------------------------------------------------|
| Other analyses | 17 | Multivariable logistic regression was analyzed for hyperuricemia and clustered CVD risk factors, the results were shown in Table 7. After adjustment for age, compared with the group of zero CVD risk factor reference group, the odd ratio for group of $\geq 3$ CVD risk factors was 3.889 (95% CI 3.322-4.552, $P < 0.001$ ), 6.270 (95% CI 4.936-7.964, $P < 0.001$ ) in men and women, respectively. The individuals with more CVD risk factors were associated with the higher ORs of hyperuricemia both in men and women ( $P$ for trend $< 0.001$ ). Furthermore, females had a stronger association of hyperuricemia with clustered CVD risk factors than males. |
|----------------|----|----------------------------------------------------------------------------------------------------------------------------------------------------------------------------------------------------------------------------------------------------------------------------------------------------------------------------------------------------------------------------------------------------------------------------------------------------------------------------------------------------------------------------------------------------------------------------------------------------------------------------------------------------------------------------|

## Discussion

|                  |    |                                                                                                                                                                                                                                                                                                                                                                                                                                                                 |
|------------------|----|-----------------------------------------------------------------------------------------------------------------------------------------------------------------------------------------------------------------------------------------------------------------------------------------------------------------------------------------------------------------------------------------------------------------------------------------------------------------|
| Key results      | 18 | In summary, our data demonstrated that the increasing prevalent rate of CRFs and renal disorders were significantly correlated with the elevated level of serum uric acid. Hyperuricemia was remarkably linked with CVD-related risk factors and kidney diseases. Furthermore, a close correlation between hyperuricemia and clustered CVD risk factors, CKD was observed in females than in males.                                                             |
| Limitations      | 19 | This study has some limitations that need to be mentioned. First, it was a cross-section study and the results could not establish causative relationships between hyperuricemia and CRFs clustering and renal diseases. Second, the data were from three medical centers' databases that lacked details in waist circumference, HOMA-IR, smoking, drinking, lifestyles, diet and pharmacotherapy, which might affect the deviations of some clinical outcomes. |
| Interpretation   | 20 | It was a cross-section study and the results could not establish causative relationships between hyperuricemia and CRFs clustering and renal diseases. Future follow-up studies are required for more accurate evaluation of these relationships.                                                                                                                                                                                                               |
| Generalisability | 21 | In Shanghai population, concomitant with the elevated level of serum uric acid, the prevalence of CRFs and renal diseases was rising. Hyperuricemia was significantly associated with CVD risk factors and renal disorders. Therefore, target inhibition of SUA level may have potential to become an effective therapy in alleviating risks of CVDs and renal disorders, especially in females.                                                                |

## Other information

|         |    |                                                                                                                                                                                                                                                                                                                                                                                                  |
|---------|----|--------------------------------------------------------------------------------------------------------------------------------------------------------------------------------------------------------------------------------------------------------------------------------------------------------------------------------------------------------------------------------------------------|
| Funding | 22 | This study was also supported by the National Nature Science Foundation of China grants (81670690, 81470991 and 81200492 to N.L., 81670623, 81470920 and 81270778 to S.Z.), US National Institutes of Health (2R01DK08506505A1 to S.Z.), Shanghai Health Bureau grant (20134464 to X.P.) and the Key Discipline Construction Project of Pudong Health Bureau of Shanghai (PWZxk2017-05 to N.L.). |
|---------|----|--------------------------------------------------------------------------------------------------------------------------------------------------------------------------------------------------------------------------------------------------------------------------------------------------------------------------------------------------------------------------------------------------|

\*Give information separately for exposed and unexposed groups.

**Note:** An Explanation and Elaboration article discusses each checklist item and gives methodological background and published examples of transparent reporting. The STROBE checklist is best used in conjunction with this article (freely available on the Web sites of PLoS Medicine at <http://www.plosmedicine.org/>, Annals of Internal Medicine at <http://www.annals.org/>, and Epidemiology at <http://www.epidem.com/>). Information on the STROBE Initiative is available at [www.strobe-statement.org](http://www.strobe-statement.org).
